# Supplementary material for: Serine Biosynthesis with One Carbon Catabolism and the Glycine Cleavage System Represents a Novel Pathway for ATP Generation
Source: PLoS One. 2011 Nov 2;6(11):e25881. doi: 10.1371/journal.pone.0025881 (PMC3206798; doi:10.1371/journal.pone.0025881)
Supplement: Table S1 — List of biochemical reactions and auxiliary reactions in the large-scale metabolic model. (XLS) [file pone.0025881.s002.xls]

## Sheet: Sheet2
1	D-Glucose exchange	<==> glc-D[c]	180.2
2	L-Alanine exchange	<==> ala-L[c]	89.1
3	L-Arginine exchange	<==> arg-L[c]	174.2
4	L-Asparagine exchange	<==> asn-L[c]	132.1
5	L-Aspartate exchange	<==> asp-L[c]	133.1
6	L-Cysteine exchange	<==> cys-L[c]	121.1
7	L-Glutamate exchange	<==> glu-L[c]	147.1
8	L-Glutamine exchange	<==> gln-L[c]	146.1
9	Glycine exchange	<==> gly[c]	75
10	Ornithine exchange	<==> orn[c]	132.2
11	L-Proline exchange	<==> pro-L[c]	115.1
12	L-Serine exchange	<==> ser-L[c]	105.1
13	L-Tyrosine exchange	<==> tyr-L[c]	181.2
14	L-Histidine exchange	<==> his-L[c]	155.1
15	L-Isoleucine exchange	<==> ile-L[c]	131.2
16	L-Leucine exchange	<==> leu-L[c]	131.2
17	L-Lysine exchange	<==> lys-L[c]	146.2
18	L-Methionine exchange	<==> met-L[c]	149.2
19	L-Phenylalanine exchange	<==> phe-L[c]	165.2
20	L-Threonine exchange	<==> thr-L[c]	119.1
21	L-Tryptophan exchange	<==> trp-L[c]	204.2
22	L-Valine exchange	<==> val-L[c]	117.1
23	Choline exchange	<==> chol[c]	139.6
24	Cholesterol exchange	<==> chsterol[c]	386.7
25	Hexadecanoate (n-C16:0) exchange	<==> hdca[c]	256.4

## Sheet: Sheet1
Label	Name	Reaction	Pathway	Compartment	EC	Reversibility		Import cost (molecular weight, g/mol)
Auxiliary reactions, exchange fluxes (v_min=0, v_max=infinity)
EX_glc(e)	D-Glucose exchange	<==> glc-D[c]		Extra-organism		Reversible		180.2
EX_ala-L(e)	L-Alanine exchange	<==> ala-L[c]		Extra-organism		Reversible		89.1
EX_arg-L(e)	L-Arginine exchange	<==> arg-L[c]		Extra-organism		Reversible		174.2
EX_asn-L(e)	L-Asparagine exchange	<==> asn-L[c]		Extra-organism		Reversible		132.1
EX_asp-L(e)	L-Aspartate exchange	<==> asp-L[c]		Extra-organism		Reversible		133.1
EX_cys-L(e)	L-Cysteine exchange	<==> cys-L[c]		Extra-organism		Reversible		121.1
EX_glu-L(e)	L-Glutamate exchange	<==> glu-L[c]		Extra-organism		Reversible		147.1
EX_gln-L(e)	L-Glutamine exchange	<==> gln-L[c]		Extra-organism		Reversible		146.1
EX_gly(e)	Glycine exchange	<==> gly[c]		Extra-organism		Reversible		75
EX_orn(e)	Ornithine exchange	<==> orn[c]		Extra-organism		Reversible		132.2
EX_pro-L(e)	L-Proline exchange	<==> pro-L[c]		Extra-organism		Reversible		115.1
EX_ser-L(e)	L-Serine exchange	<==> ser-L[c]		Extra-organism		Reversible		105.1
EX_tyr-L(e)	L-Tyrosine exchange	<==> tyr-L[c]		Extra-organism		Reversible		181.2
EX_his-L(e)	L-Histidine exchange	<==> his-L[c]		Extra-organism		Reversible		155.1
EX_ile-L(e)	L-Isoleucine exchange	<==> ile-L[c]		Extra-organism		Reversible		131.2
EX_leu-L(e)	L-Leucine exchange	<==> leu-L[c]		Extra-organism		Reversible		131.2
EX_lys-L(e)	L-Lysine exchange	<==> lys-L[c]		Extra-organism		Reversible		146.2
EX_met-L(e)	L-Methionine exchange	<==> met-L[c]		Extra-organism		Reversible		149.2
EX_phe-L(e)	L-Phenylalanine exchange	<==> phe-L[c]		Extra-organism		Reversible		165.2
EX_thr-L(e)	L-Threonine exchange	<==> thr-L[c]		Extra-organism		Reversible		119.1
EX_trp-L(e)	L-Tryptophan exchange	<==> trp-L[c]		Extra-organism		Reversible		204.2
EX_val-L(e)	L-Valine exchange	<==> val-L[c]		Extra-organism		Reversible		117.1
EX_chol(e)	Choline exchange	<==> chol[c]		Extra-organism		Reversible		139.6
EX_chsterol(e)	Cholesterol exchange	<==> chsterol[c]		Extra-organism		Reversible		386.7
EX_hdca(e)	Hexadecanoate (n-C16:0) exchange	<==> hdca[c]		Extra-organism		Reversible		256.4
EX_h2o(e)	H2O exchange	<==> h2o[c]		Extra-organism		Reversible		0
EX_pi(e)	Phosphate exchange	<==> pi[c]		Extra-organism		Reversible		0
EX_h(e)	H+ exchange	<==> h[c]		Extra-organism		Reversible		0
EX_o2(e)	O2 exchange	<==> o2[c]		Extra-organism		Reversible		0
EX_co2(e)	CO2 exchange	<==> co2[c]		Extra-organism		Reversible		0
EX_k(e)	K+ exchange	<==> k[c]		Extra-organism		Reversible		0
EX_na1(e)	Sodium exchange	<==> na1[c]		Extra-organism		Reversible		0
EX_ca2(e)	Calcium exchange	<==> ca2[c]		Extra-organism		Reversible		0
EX_fe2(e)	Fe2+ exchange	<==> fe2[c]		Extra-organism		Reversible		0
EX_fe3(e)	Fe3+ exchange	<==> fe3[c]		Extra-organism		Reversible		0
EX_nh4(e)	Ammonia exchange	<==> nh4[c]		Extra-organism		Reversible		0
EX_urea(e)	Urea exchange	<==> urea[c]		Extra-organism		Reversible		0
EX_hco3(e)	Bicarbonate exchange	<==> hco3[c]		Extra-organism		Reversible		0
EX_so4(e)	Sulfate exchange	<==> so4[c]		Extra-organism		Reversible		0
EX_for(e)	Formate exchange	--> for[c]		Extra-organism		Reversible
EX_dhf(e)	7,8-Dihydrofolate exchange	--> dhf[c]		Extra-organism		Reversible
EX_lac-L(e)	L-Lactate exchange	lac-L[c] -->		Extra-organism		Reversible
Auxiliary reactions, biomass synthesis (v_min=0, v_max=infinity)
ATP maintenance	ATP maintenance	[c] : atp --> adp
Protein degradation	Protein degradation	[c] : proteins -->
Glycogen	Glycogen	[c] : (0.28) udpg --> glycogen	Synthesis of biomass components (mmol/g DW)
Lipids synthesis	Lipids synthesis	[c] : (0.0182) chsterol + (0.0695) pchol_hs + (0.0263) pe_hs + (0.0095) pail_hs + (0.0026) ps_hs + (0.0013) pglyc_hs + (0.0028) pgp_hs + (0.0084) sphmyln_hs --> lipids	Synthesis of biomass components (mmol/g DW)
Protein sythesis	Protein sythesis	[c] : (0.600) ala-L +(0.377) arg-L + (0.359) asp-L + (0.288) asn-L + (0.145) cys-L + (0.322) gln-L + (0.386) glu-L + (0.538) gly + (0.143) his-L + (0.324) ile-L + (0.564) leu-L + (0.570) lys-L + (0.138) met-L + (0.219) phe-L + (0.313) pro-L + (0.430) ser-L + (0.386) thr-L + (0.044) trp-L + (0.182) tyr-L + (0.416) val-L + (29.04) atp --> (0.018) proteins + (29.04) adp	Synthesis of biomass components (mmol/g DW)
DNA synthesis	DNA synthesis	[c] : (0.0148) damp + (0.0099) dcmp + (0.0099) dgmp + (0.0148) dtmp + (0.07) atp --> dna + (0.07) adp	Synthesis of biomass components (mmol/g DW)
RNA synthesis	RNA synthesis	[c] : (0.033) amp + (0.551) cmp +(0.0624) gmp + (0.0330) ump + (0.07) atp --> rna + (0.07) adp	Synthesis of biomass components (mmol/g DW)
Biomass synthesis	Biomass synthesis	[c] : glycogen + lipids + (0.018) proteins + rna + dna -->	Auxiliary reaction to model cell proliferation
Annotated reactions, always active, (v_min=0, v_max=infinity)
ENO	enolase	[c] : 2pg <==> h2o + pep	Glycolysis/Gluconeogenesis	Cytosol	4.2.1.11	Reversible
FBA	fructose-bisphosphate aldolase	[c] : fdp <==> dhap + g3p	Glycolysis/Gluconeogenesis	Cytosol	4.1.2.13	Reversible
HEX1	hexokinase (D-glucose:ATP)	[c] : atp + glc-D --> adp + g6p + h	Glycolysis/Gluconeogenesis	Cytosol	2.7.1.1	Irreversible
FBP	fructose-bisphosphatase	[c] : fdp + h2o --> f6p + pi	Glycolysis/Gluconeogenesis	Cytosol	3.1.3.11	Irreversible
GAPD	glyceraldehyde-3-phosphate dehydrogenase	[c] : g3p + nad + pi <==> 13dpg + h + nadh	Glycolysis/Gluconeogenesis	Cytosol	1.2.1.12	Reversible
PYK	pyruvate kinase	[c] : adp + h + pep --> atp + pyr	Glycolysis/Gluconeogenesis	Cytosol	2.7.1.40	Irreversible
PFK	phosphofructokinase	[c] : atp + f6p --> adp + fdp + h	Glycolysis/Gluconeogenesis	Cytosol	2.7.1.11	Irreversible
MGSA	methylglyoxal synthase	[c] : dhap --> mthgxl + pi	Pyruvate Metabolism	Cytosol	4.2.3.3	Irreversible
PGI	glucose-6-phosphate isomerase	[c] : g6p <==> f6p	Glycolysis/Gluconeogenesis	Cytosol	5.3.1.9	Reversible
PGM	phosphoglycerate mutase	[c] : 2pg <==> 3pg	Glycolysis/Gluconeogenesis	Cytosol	5.4.2.1	Reversible
PGK	phosphoglycerate kinase	[c] : 3pg + atp <==> 13dpg + adp	Glycolysis/Gluconeogenesis	Cytosol	2.7.2.3	Reversible
TPI	triose-phosphate isomerase	[c] : dhap <==> g3p	Glycolysis/Gluconeogenesis	Cytosol	5.3.1.1	Reversible
GND	phosphogluconate dehydrogenase	[c] : 6pgc + nadp --> co2 + nadph + ru5p-D	Pentose Phosphate Pathway	Cytosol	1.1.1.44	Irreversible
PGL	6-phosphogluconolactonase	[c] : 6pgl + h2o --> 6pgc + h	Pentose Phosphate Pathway	Cytosol	3.1.1.31	Irreversible
RPI	ribose-5-phosphate isomerase	[c] : r5p <==> ru5p-D	Pentose Phosphate Pathway	Cytosol	5.3.1.6	Reversible
RPE	ribulose 5-phosphate 3-epimerase	[c] : ru5p-D <==> xu5p-D	Pentose Phosphate Pathway	Cytosol	5.1.3.1	Reversible
TALA	transaldolase	[c] : g3p + s7p <==> e4p + f6p	Pentose Phosphate Pathway	Cytosol	2.2.1.2	Reversible
TKT1	transketolase	[c] : r5p + xu5p-D <==> g3p + s7p	Pentose Phosphate Pathway	Cytosol	2.2.1.1	Reversible
TKT2	transketolase	[c] : e4p + xu5p-D <==> f6p + g3p	Pentose Phosphate Pathway	Cytosol	2.2.1.1	Reversible
ACONT	aconitase	[c] : cit <==> icit	Citric Acid Cycle	Cytosol	4.2.1.3	Reversible
ACS	acetyl-CoA synthetase	[c] : ac + atp + coa --> accoa + amp + ppi	Glycolysis/Gluconeogenesis	Cytosol	6.2.1.1	Irreversible
FDH	formate dehydrogenase	[c] : for + nad --> co2 + nadh	Fatty Acid Metabolism	Cytosol	1.2.1.2	Irreversible
LDH_D	D-lactate dehydrogenase	[c] : lac-D + nad <==> h + nadh + pyr	Pyruvate Metabolism	Cytosol	1.1.1.28	Reversible
LDH_L	L-lactate dehydrogenase	[c] : lac-L + nad <==> h + nadh + pyr	Glycolysis/Gluconeogenesis	Cytosol	1.1.1.27	Reversible
PPA	inorganic diphosphatase	[c] : h2o + ppi --> h + (2) pi	Oxidative Phosphorylation	Cytosol	3.6.1.1	Irreversible
ME2	malic enzyme (NADP)	[c] : mal-L + nadp --> co2 + nadph + pyr	Pyruvate Metabolism	Cytosol	1.1.1.40	Irreversible
TRDR	thioredoxin reductase (NADPH)	[c] : h + nadph + trdox --> nadp + trdrd	Nucleotides	Cytosol	1.8.1.9	Irreversible
GALK	galactokinase	[c] : atp + gal --> adp + gal1p + h	Galactose metabolism	Cytosol	2.7.1.6	Irreversible
GALT	galactose-1-phosphate uridylyltransferase	[c] : gal1p + h + utp <==> ppi + udpgal	Galactose metabolism	Cytosol	2.7.7.10	Reversible
UDPG4E	UDPglucose 4-epimerase	[c] : udpg <==> udpgal	Galactose metabolism	Cytosol	5.1.3.2	Reversible
GALU	UTP-glucose-1-phosphate uridylyltransferase	[c] : g1p + h + utp <==> ppi + udpg	Galactose metabolism	Cytosol	2.7.7.9	Reversible
PGMT	phosphoglucomutase	[c] : g1p <==> g6p	Glycolysis/Gluconeogenesis	Cytosol	5.4.2.2	Reversible
PMANM	phosphomannomutase	[c] : man1p <==> man6p	Fructose and Mannose Metabolism	Cytosol	5.4.2.8	Reversible
MAN6PI	mannose-6-phosphate isomerase	[c] : man6p <==> f6p	Fructose and Mannose Metabolism	Cytosol	5.3.1.8	Reversible
G6PDA	glucosamine-6-phosphate deaminase	[c] : gam6p + h2o --> f6p + nh4	Aminosugar Metabolism	Cytosol	3.5.99.6	Irreversible
ALDD2x	aldehyde dehydrogenase (acetaldehyde, NAD)	[c] : acald + h2o + nad --> ac + (2) h + nadh	Glycolysis/Gluconeogenesis	Cytosol	1.2.1.3	Irreversible
ALDD2y	aldehyde dehydrogenase (acetaldehyde, NADP)	[c] : acald + h2o + nadp --> ac + (2) h + nadph	Glycolysis/Gluconeogenesis	Cytosol	1.2.1.4	Irreversible
XYLK	xylulokinase	[c] : atp + xylu-D --> adp + h + xu5p-D	Pentose and Glucuronate Interconversions	Cytosol	2.7.1.17	Irreversible
RBK	ribokinase	[c] : atp + rib-D --> adp + h + r5p	Pentose Phosphate Pathway	Cytosol	2.7.1.15	Irreversible
GLYK	glycerol kinase	[c] : atp + glyc --> adp + glyc3p + h	Glycerophospholipid Metabolism	Cytosol	2.7.1.30	Irreversible
G3PD1	glycerol-3-phosphate dehydrogenase (NAD)	[c] : glyc3p + nad <==> dhap + h + nadh	Glycerophospholipid Metabolism	Cytosol	1.1.1.94	Reversible
PPM	phosphopentomutase	[c] : r1p <==> r5p	Pentose Phosphate Pathway	Cytosol	5.4.2.7	Reversible
DRPA	deoxyribose-phosphate aldolase	[c] : 2dr5p --> acald + g3p	Pentose Phosphate Pathway	Cytosol	4.1.2.4	Irreversible
ASNS1	asparagine synthase (glutamine-hydrolysing)	[c] : asp-L + atp + gln-L + h2o --> amp + asn-L + glu-L + h + ppi	Alanine and Aspartate Metabolism	Cytosol	6.3.5.4	Irreversible
ASPTA	aspartate transaminase	[c] : akg + asp-L <==> glu-L + oaa	Alanine and Aspartate Metabolism	Cytosol	2.6.1.1	Reversible
ALAR	alanine racemase	[c] : ala-L <==> ala-D	Alanine and Aspartate Metabolism	Cytosol	5.1.1.1	Reversible
ALATA_L	L-alanine transaminase	[c] : akg + ala-L <==> glu-L + pyr	Glutamate metabolism	Cytosol	2.6.1.2	Reversible
MTRI	5-methylthioribose-1-phosphate isomerase	[c] : 5mdr1p <==> 5mdru1p	Arginine and Proline Metabolism	Cytosol	5.3.1.23	Reversible
ADMDC	adenosylmethionine decarboxylase	[c] : amet + h --> ametam + co2	Arginine and Proline Metabolism	Cytosol	4.1.1.50	Irreversible
ARGSL	argininosuccinate lyase	[c] : argsuc <==> arg-L + fum	Alanine and Aspartate Metabolism	Cytosol	4.3.2.1	Reversible
ARGSS	argininosuccinate synthase	[c] : asp-L + atp + citr-L --> amp + argsuc + h + ppi	Alanine and Aspartate Metabolism	Cytosol	6.3.4.5	Irreversible
CBPS	carbamoyl-phosphate synthase (glutamine-hydrolysing)	[c] : (2) atp + gln-L + h2o + hco3 --> (2) adp + cbp + glu-L + (2) h + pi	Pyrimidine Biosynthesis	Cytosol	6.3.5.5	Irreversible
SPMS	spermidine synthase	[c] : ametam + ptrc --> 5mta + h + spmd	Urea cycle/amino group metabolism	Cytosol	2.5.1.16	Irreversible
ILETA	isoleucine transaminase	[c] : akg + ile-L <==> 3mop + glu-L	Valine, Leucine, and Isoleucine Metabolism	Cytosol	2.6.1.42	Reversible
VALTA	valine transaminase	[c] : akg + val-L <==> 3mob + glu-L	Valine, Leucine, and Isoleucine Metabolism	Cytosol	2.6.1.42	Reversible
THRD_L	L-threonine deaminase	[c] : thr-L --> 2obut + nh4	Glycine, Serine, and Threonine Metabolism	Cytosol	4.3.1.19	Irreversible
TYRTA	tyrosine transaminase	[c] : akg + tyr-L <==> 34hpp + glu-L	Tyrosine metabolism	Cytosol	2.6.1.5	Reversible
PHETA1	phenylalanine transaminase	[c] : akg + phe-L <==> glu-L + phpyr	Phenylalanine metabolism	Cytosol	2.6.1.58	Reversible
PRPPS	phosphoribosylpyrophosphate synthetase	[c] : atp + r5p <==> amp + h + prpp	Pentose Phosphate Pathway	Cytosol	2.7.6.1	Reversible
PGCD	phosphoglycerate dehydrogenase	[c] : 3pg + nad --> 3php + h + nadh	Glycine, Serine, and Threonine Metabolism	Cytosol	1.1.1.95	Irreversible
PSP_L	phosphoserine phosphatase (L-serine)	[c] : h2o + pser-L --> pi + ser-L	Glycine, Serine, and Threonine Metabolism	Cytosol	3.1.3.3	Irreversible
SADT	sulfate adenylyltransferase	[c] : atp + h + so4 --> aps + ppi	Nucleotides	Cytosol	2.7.7.4	Irreversible
ADSK	adenylyl-sulfate kinase	[c] : aps + atp --> adp + h + paps	Nucleotides	Cytosol	2.7.1.25	Irreversible
BPNT	3',5'-bisphosphate nucleotidase	[c] : h2o + pap --> amp + pi	Nucleotides	Cytosol	3.1.3.7	Irreversible
THRS	threonine synthase	[c] : h2o + phom --> pi + thr-L	Glycine, Serine, and Threonine Metabolism	Cytosol	4.2.3.1	Irreversible
AHC	adenosylhomocysteinase	[c] : ahcys + h2o <==> adn + hcys-L	Methionine Metabolism	Cytosol	3.3.1.1	Reversible
METAT	methionine adenosyltransferase	[c] : atp + h2o + met-L --> amet + pi + ppi	Methionine Metabolism	Cytosol	2.5.1.6	Irreversible
ARGN	arginase	[c] : arg-L + h2o --> orn + urea	Urea cycle/amino group metabolism	Cytosol	3.5.3.1	Irreversible
HISD	histidase	[c] : his-L --> nh4 + urcan	Histidine Metabolism	Cytosol	4.3.1.3	Irreversible
URCN	urocanase	[c] : h2o + urcan --> 4izp	Histidine Metabolism	Cytosol	4.2.1.49	Irreversible
ADSL1	adenylosuccinate lyase	[c] : dcamp --> amp + fum	Nucleotides	Cytosol	4.3.2.2	Irreversible
ADSL2	adenylosuccinate lyase	[c] : 25aics --> aicar + fum	IMP Biosynthesis	Cytosol	4.3.2.2	Irreversible
AICART	phosphoribosylaminoimidazolecarboxamide formyltransferase	[c] : 10fthf + aicar <==> fprica + thf	IMP Biosynthesis	Cytosol	2.1.2.3	Reversible
IMPC	IMP cyclohydrolase	[c] : h2o + imp <==> fprica	IMP Biosynthesis	Cytosol	3.5.4.10	Reversible
IMPD	IMP dehydrogenase	[c] : h2o + imp + nad --> h + nadh + xmp	Nucleotides	Cytosol	1.1.1.205	Irreversible
CTPS2	CTP synthase (glutamine)	[c] : atp + gln-L + h2o + utp --> adp + ctp + glu-L + (2) h + pi	Pyrimidine Biosynthesis	Cytosol	6.3.4.2	Irreversible
DHORTS	dihydroorotase	[c] : dhor-S + h2o <==> cbasp + h	Pyrimidine Biosynthesis	Cytosol	3.5.2.3	Reversible
OMPDC	orotidine-5'-phosphate decarboxylase	[c] : h + orot5p --> co2 + ump	Pyrimidine Biosynthesis	Cytosol	4.1.1.23	Irreversible
ORPT	orotate phosphoribosyltransferase	[c] : orot5p + ppi <==> orot + prpp	Pyrimidine Biosynthesis	Cytosol	2.4.2.10	Reversible
NTD1	5'-nucleotidase (dUMP)	[c] : dump + h2o --> duri + pi	Pyrimidine Catabolism	Cytosol	3.1.3.5	Irreversible
NTD2	5'-nucleotidase (UMP)	[c] : h2o + ump --> pi + uri	Pyrimidine Catabolism	Cytosol	3.1.3.5	Irreversible
NTD3	5'-nucleotidase (dCMP)	[c] : dcmp + h2o --> dcyt + pi	Pyrimidine Catabolism	Cytosol	3.1.3.5	Irreversible
NTD4	5'-nucleotidase (CMP)	[c] : cmp + h2o --> cytd + pi	Pyrimidine Catabolism	Cytosol	3.1.3.5	Irreversible
NTD5	5'-nucleotidase (dTMP)	[c] : dtmp + h2o --> pi + thymd	Pyrimidine Catabolism	Cytosol	3.1.3.5	Irreversible
NTD6	5'-nucleotidase (dAMP)	[c] : damp + h2o --> dad-2 + pi	Nucleotides	Cytosol	3.1.3.5	Irreversible
NTD7	5'-nucleotidase (AMP)	[c] : amp + h2o --> adn + pi	Nucleotides	Cytosol	3.1.3.5	Irreversible
NTD8	5'-nucleotidase (dGMP)	[c] : dgmp + h2o --> dgsn + pi	Nucleotides	Cytosol	3.1.3.5	Irreversible
NTD9	5'-nucleotidase (GMP)	[c] : gmp + h2o --> gsn + pi	Nucleotides	Cytosol	3.1.3.5	Irreversible
NTD10	5'-nucleotidase (XMP)	[c] : h2o + xmp --> pi + xtsn	Nucleotides	Cytosol	3.1.3.5	Irreversible
NTD11	5'-nucleotidase (IMP)	[c] : h2o + imp --> ins + pi	Purine Catabolism	Cytosol	3.1.3.5	Irreversible
ADPT	adenine phosphoribosyltransferase	[c] : ade + prpp --> amp + ppi	Salvage Pathway	Cytosol	2.4.2.7	Irreversible
ADNK1	adenosine kinase	[c] : adn + atp --> adp + amp + h	Nucleotides	Cytosol	2.7.1.20	Irreversible
ADK1	adenylate kinase	[c] : amp + atp <==> (2) adp	Nucleotides	Cytosol	2.7.4.3	Reversible
CYTK1	cytidylate kinase (CMP)	[c] : atp + cmp <==> adp + cdp	Nucleotides	Cytosol	2.7.4.14	Reversible
CYTK2	cytidylate kinase (dCMP)	[c] : atp + dcmp <==> adp + dcdp	Nucleotides	Cytosol	2.7.4.14	Reversible
UMPK	UMP kinase	[c] : atp + ump <==> adp + udp	Nucleotides	Cytosol	2.7.4.14	Reversible
GK1	guanylate kinase (GMP:ATP)	[c] : atp + gmp <==> adp + gdp	Nucleotides	Cytosol	2.7.4.8	Reversible
DGK1	deoxyguanylate kinase (dGMP:ATP)	[c] : atp + dgmp <==> adp + dgdp	Nucleotides	Cytosol	2.7.4.8	Reversible
DTMPK	dTMP kinase	[c] : atp + dtmp <==> adp + dtdp	Nucleotides	Cytosol	2.7.4.9	Reversible
NDPK1	nucleoside-diphosphate kinase (ATP:GDP)	[c] : atp + gdp <==> adp + gtp	Nucleotides	Cytosol	2.7.4.6	Reversible
NDPK2	nucleoside-diphosphate kinase (ATP:UDP)	[c] : atp + udp <==> adp + utp	Nucleotides	Cytosol	2.7.4.6	Reversible
NDPK3	nucleoside-diphosphate kinase (ATP:CDP)	[c] : atp + cdp <==> adp + ctp	Nucleotides	Cytosol	2.7.4.6	Reversible
NDPK4	nucleoside-diphosphate kinase (ATP:dTDP)	[c] : atp + dtdp <==> adp + dttp	Nucleotides	Cytosol	2.7.4.6	Reversible
NDPK5	nucleoside-diphosphate kinase (ATP:dGDP)	[c] : atp + dgdp <==> adp + dgtp	Nucleotides	Cytosol	2.7.4.6	Reversible
NDPK6	nucleoside-diphosphate kinase (ATP:dUDP)	[c] : atp + dudp <==> adp + dutp	Nucleotides	Cytosol	2.7.4.6	Reversible
NDPK7	nucleoside-diphosphate kinase (ATP:dCDP)	[c] : atp + dcdp <==> adp + dctp	Nucleotides	Cytosol	2.7.4.6	Reversible
NDPK8	nucleoside-diphosphate kinase (ATP:dADP)	[c] : atp + dadp <==> adp + datp	Nucleotides	Cytosol	2.7.4.6	Reversible
PUNP1	purine-nucleoside phosphorylase (Adenosine)	[c] : adn + pi <==> ade + r1p	Nucleotides	Cytosol	2.4.2.1	Reversible
PUNP2	purine-nucleoside phosphorylase (Deoxyadenosine)	[c] : dad-2 + pi <==> 2dr1p + ade	Purine Catabolism	Cytosol	2.4.2.1	Reversible
PUNP3	purine-nucleoside phosphorylase (Guanosine)	[c] : gsn + pi <==> gua + r1p	Purine Catabolism	Cytosol	2.4.2.1	Reversible
PUNP4	purine-nucleoside phosphorylase (Deoxyguanosine)	[c] : dgsn + pi <==> 2dr1p + gua	Purine Catabolism	Cytosol	2.4.2.1	Reversible
PUNP5	purine-nucleoside phosphorylase (Inosine)	[c] : ins + pi <==> hxan + r1p	Purine Catabolism	Cytosol	2.4.2.1	Reversible
PUNP6	purine-nucleoside phosphorylase (Deoxyinosine)	[c] : din + pi <==> 2dr1p + hxan	Purine Catabolism	Cytosol	2.4.2.1	Reversible
PUNP7	purine-nucleoside phosphorylase (Xanthosine)	[c] : pi + xtsn <==> r1p + xan	Nucleotides	Cytosol	2.4.2.1	Reversible
RNDR1	ribonucleoside-diphosphate reductase (ADP)	[c] : adp + trdrd --> dadp + h2o + trdox	Nucleotides	Cytosol	1.17.4.1	Irreversible
RNDR2	ribonucleoside-diphosphate reductase (GDP)	[c] : gdp + trdrd --> dgdp + h2o + trdox	Nucleotides	Cytosol	1.17.4.1	Irreversible
RNDR3	ribonucleoside-diphosphate reductase (CDP)	[c] : cdp + trdrd --> dcdp + h2o + trdox	Nucleotides	Cytosol	1.17.4.1	Irreversible
RNDR4	ribonucleoside-diphosphate reductase (UDP)	[c] : trdrd + udp --> dudp + h2o + trdox	Nucleotides	Cytosol	1.17.4.1	Irreversible
TMDS	thymidylate synthase	[c] : dump + mlthf --> dhf + dtmp	Nucleotides	Cytosol	2.1.1.45	Irreversible
TMDK1	thymidine kinase (ATP:thymidine)	[c] : atp + thymd --> adp + dtmp + h	Nucleotides	Cytosol	2.7.1.21	Irreversible
DURIK1	deoxyuridine kinase (ATP:Deoxyuridine)	[c] : atp + duri --> adp + dump + h	Nucleotides	Cytosol		Irreversible
TMDPP	thymidine phosphorylase	[c] : pi + thymd <==> 2dr1p + thym	Pyrimidine Catabolism	Cytosol	2.4.2.4	Reversible
URIK1	uridine kinase (ATP:Uridine)	[c] : atp + uri --> adp + h + ump	Pyrimidine Biosynthesis	Cytosol	2.7.1.48	Irreversible
CYTDK1	cytidine kinase (ATP)	[c] : atp + cytd --> adp + cmp + h	Nucleotides	Cytosol		Irreversible
HXPRT	hypoxanthine phosphoribosyltransferase (Hypoxanthine)	[c] : hxan + prpp --> imp + ppi	Salvage Pathway	Cytosol	2.4.2.8	Irreversible
DMATT	dimethylallyltranstransferase	[c] : dmpp + ipdp --> grdp + ppi	Cholesterol Metabolism	Cytosol	2.5.1.1	Irreversible
GRTT	geranyltranstransferase	[c] : grdp + ipdp --> frdp + ppi	Cholesterol Metabolism	Cytosol	2.5.1.10	Irreversible
FRTT	farnesyltranstransferase	[c] : frdp + ipdp --> ggdp + ppi	Cholesterol Metabolism	Cytosol	2.5.1.29	Irreversible
RBFK	riboflavin kinase	[c] : atp + ribflv --> adp + fmn + h	Riboflavin Metabolism	Cytosol	2.7.1.26	Irreversible
ACP1(FMN)	acid phosphatase (FMN)	[c] : fmn + h2o --> pi + ribflv	Riboflavin Metabolism	Cytosol	3.1.3.2	Irreversible
DNADDP	Deaminido NAD diphosphatase	[c] : dnad + h2o --> amp + (2) h + nicrnt	NAD Metabolism	Cytosol	3.6.1.9	Irreversible
DHFR	dihydrofolate reductase	[c] : dhf + h + nadph <==> nadp + thf	Folate Metabolism	Cytosol	1.5.1.3	Reversible
LEUTA	leucine transaminase	[c] : akg + leu-L <==> 4mop + glu-L	Valine, Leucine, and Isoleucine Metabolism	Cytosol	2.6.1.6	Reversible
PNTK	pantothenate kinase	[c] : atp + pnto-R --> 4ppan + adp + h	CoA Biosynthesis	Cytosol	2.7.1.33	Irreversible
PPCDC	phosphopantothenoylcysteine decarboxylase	[c] : 4ppcys + h --> co2 + pan4p	CoA Biosynthesis	Cytosol	4.1.1.36	Irreversible
PTPAT	pantetheine-phosphate adenylyltransferase	[c] : atp + h + pan4p <==> dpcoa + ppi	CoA Biosynthesis	Cytosol	2.7.7.3	Reversible
DPCOAK	dephospho-CoA kinase	[c] : atp + dpcoa --> adp + coa + h	CoA Biosynthesis	Cytosol	2.7.1.24	Irreversible
DHPM1	dihydropyrimidinase (5,6-dihydrouracil)	[c] : 56dura + h2o --> cala + h	Pyrimidine Catabolism	Cytosol	3.5.2.2	Irreversible
DHPM2	dihydropyrimidinase (dihydrothymine)	[c] : 56dthm + h2o --> 3uib + h	Pyrimidine Catabolism	Cytosol	3.5.2.2	Irreversible
NADPN	NADP nucleosidase	[c] : h2o + nadp --> adprbp + h + ncam	NAD Metabolism	Cytosol	3.2.2.6	Irreversible
NADN	NAD nucleosidase	[c] : h2o + nad --> adprib + h + ncam	NAD Metabolism	Cytosol	3.2.2.5	Irreversible
NNAT	nicotinate-nucleotide adenylyltransferase	[c] : atp + h + nicrnt --> dnad + ppi	NAD Metabolism	Cytosol	2.7.7.18	Irreversible
NADK	NAD kinase	[c] : atp + nad --> adp + h + nadp	NAD Metabolism	Cytosol	2.7.1.23	Irreversible
NADS2	NAD synthase (glutamine-hydrolysing)	[c] : atp + dnad + gln-L + h2o --> amp + glu-L + h + nad + ppi	NAD Metabolism	Cytosol	6.3.5.1	Irreversible
RBK_D	D-ribulokinase	[c] : atp + rbl-D --> adp + h + ru5p-D	Pentose and Glucuronate Interconversions	Cytosol	2.7.1.47	Irreversible
FADDP	FAD diphosphatase	[c] : fad + h2o --> amp + fmn + (2) h	Riboflavin Metabolism	Cytosol	3.6.1.9	Irreversible
FMNAT	FMN adenylyltransferase	[c] : atp + fmn + h --> fad + ppi	Riboflavin Metabolism	Cytosol	2.7.7.2	Irreversible
NMNS	NMN synthetase	[c] : h + ncam + prpp --> nmn + ppi	NAD Metabolism	Cytosol	2.4.2.12	Irreversible
RNMK	ribosylnicotinamide kinase	[c] : atp + rnam --> adp + h + nmn	NAD Metabolism	Cytosol	2.7.1.22	Irreversible
DADNK	deoxyadenosine kinase	[c] : atp + dad-2 --> adp + damp + h	Nucleotides	Cytosol	2.7.1.76	Irreversible
GUAPRT	guanine phosphoribosyltransferase	[c] : gua + prpp --> gmp + ppi	Salvage Pathway	Cytosol	2.4.2.8	Irreversible
ACCOAC	acetyl-CoA carboxylase	[c] : accoa + atp + hco3 --> adp + h + malcoa + pi	Fatty Acid Metabolism	Cytosol	6.4.1.2	Irreversible
ACACT1	acetyl-CoA C-acetyltransferase	[c] : (2) accoa --> aacoa + coa	Cholesterol Metabolism	Cytosol	2.3.1.9	Irreversible
HMBS	hydroxymethylbilane synthase	[c] : h2o + (4) ppbng --> hmbil + (4) nh4	Heme Biosynthesis	Cytosol	4.3.1.8	Irreversible
UPP3S	uroporphyrinogen-III synthase	[c] : hmbil --> h2o + uppg3	Heme Biosynthesis	Cytosol	4.2.1.75	Irreversible
UPPDC1	uroporphyrinogen decarboxylase (uroporphyrinogen III)	[c] : (4) h + uppg3 --> (4) co2 + cpppg3	Heme Biosynthesis	Cytosol	4.1.1.37	Irreversible
PDHm	pyruvate dehydrogenase	[m] : coa + nad + pyr --> accoa + co2 + nadh	Glycolysis/Gluconeogenesis	Mitochondria	1.2.4.1	Irreversible
CSm	citrate synthase	[m] : accoa + h2o + oaa --> cit + coa + h	Citric Acid Cycle	Mitochondria		Irreversible
NNDPR	nicotinate-nucleotide diphosphorylase (carboxylating)	[c] : (2) h + prpp + quln --> co2 + nicrnt + ppi	NAD Metabolism	Cytosol	2.4.2.19	Irreversible
ASP1DC	aspartate 1-decarboxylase	[c] : asp-L + h --> ala-B + co2	beta-Alanine metabolism	Cytosol	4.1.1.11	Irreversible
ALCD1	alcohol dehydrogenase (methanol)	[c] : meoh + nad <==> fald + h + nadh	Miscellaneous	Cytosol		Reversible
ADPRDP	ADPribose diphosphatase	[c] : adprib + h2o --> amp + (2) h + r5p	Nucleotides	Cytosol	3.6.1.13	Irreversible
ACONTm	Aconitate hydratase	[m] : cit <==> icit	Citric Acid Cycle	Mitochondria	4.2.1.3	Reversible
ICDHxm	Isocitrate dehydrogenase (NAD+)	[m] : icit + nad --> akg + co2 + nadh	Citric Acid Cycle	Mitochondria	1.1.1.41	Irreversible
ICDHyp	Isocitrate dehydrogenase (NADP+)	[x] : icit + nadp --> akg + co2 + nadph	Citric Acid Cycle	Peroxisome	1.1.1.42	Irreversible
SUCOAS1m	Succinate--CoA ligase (GDP-forming)	[m] : coa + gtp + succ <==> gdp + pi + succoa	Citric Acid Cycle	Mitochondria	6.2.1.4	Reversible
ME2m	malic enzyme (NADP), mitochondrial	[m] : mal-L + nadp --> co2 + nadph + pyr	Pyruvate Metabolism	Mitochondria	1.1.1.40	Irreversible
MDH	malate dehydrogenase	[c] : mal-L + nad <==> h + nadh + oaa	Citric Acid Cycle	Cytosol	1.1.1.37	Reversible
FUM	fumarase	[c] : fum + h2o <==> mal-L	Citric Acid Cycle	Cytosol	4.2.1.2	Reversible
MDHm	malate dehydrogenase, mitochondrial	[m] : mal-L + nad <==> h + nadh + oaa	Citric Acid Cycle	Mitochondria	1.1.1.37	Reversible
FUMm	fumarase, mitochondrial	[m] : fum + h2o <==> mal-L	Citric Acid Cycle	Mitochondria	4.2.1.2	Reversible
HEX4	hexokinase (D-mannose:ATP)	[c] : atp + man --> adp + h + man6p	Fructose and Mannose Metabolism	Cytosol	2.7.1.7	Irreversible
HEX7	hexokinase (D-fructose:ATP)	[c] : atp + fru --> adp + f6p + h	Fructose and Mannose Metabolism	Cytosol	2.7.1.1	Irreversible
HEX10	hexokinase (D-glucosamine:ATP)	[c] : atp + gam --> adp + gam6p + h	Aminosugar Metabolism	Cytosol	2.7.1.1	Irreversible
MALT	alpha-glucosidase	[c] : h2o + malt --> (2) glc-D	Starch and Sucrose Metabolism	Cytosol	3.2.1.20	Irreversible
TREH	alpha,alpha-trehalase	[c] : h2o + tre --> (2) glc-D	Starch and Sucrose Metabolism	Cytosol	3.2.1.28	Irreversible
PFK26	6-phosphofructo-2-kinase	[c] : atp + f6p --> adp + f26bp + h	Fructose and Mannose Metabolism	Cytosol	2.7.1.105	Irreversible
ACSm	acetyl-CoA synthetase	[m] : ac + atp + coa --> accoa + amp + ppi	Glycolysis/Gluconeogenesis	Mitochondria	6.2.1.1	Irreversible
GLYOX	hydroxyacylglutathione hydrolase	[c] : h2o + lgt-S --> gthrd + h + lac-D	Pyruvate Metabolism	Cytosol	3.1.2.6	Irreversible
GLYOXm	hydroxyacylglutathione hydrolase, mitochondrial	[m] : h2o + lgt-S --> gthrd + h + lac-D	Pyruvate Metabolism	Mitochondria	3.1.2.6	Irreversible
LGTHL	lactoylglutathione lyase	[c] : gthrd + mthgxl --> lgt-S	Pyruvate Metabolism	Cytosol	4.4.1.5	Irreversible
PPAm	inorganic diphosphatase	[m] : h2o + ppi --> h + (2) pi	Oxidative Phosphorylation	Mitochondria	3.6.1.1	Irreversible
UAGDP	UDP-N-acetylglucosamine diphosphorylase	[c] : acgam1p + h + utp --> ppi + uacgam	Aminosugar Metabolism	Cytosol	2.7.7.23	Irreversible
FBP26	Fructose-2,6-bisphosphate 2-phosphatase	[c] : f26bp + h2o --> f6p + pi	Fructose and Mannose Metabolism	Cytosol	3.1.3.46	Irreversible
UNK2	2-keto-4-methylthiobutyrate transamination	[c] : 2kmb + gln-L + h --> glu-L + met-L	Arginine and Proline Metabolism	Cytosol		Irreversible
NDP6	nucleoside-diphosphatase (dCDP)	[c] : dcdp + h2o --> dcmp + h + pi	Nucleotides	Cytosol	3.6.1.6	Irreversible
NDP8	nucleoside-diphosphatase (dUDP)	[c] : dudp + h2o --> dump + h + pi	Nucleotides	Cytosol	3.6.1.6	Irreversible
CO2tm	CO2 transport (diffusion), mitochondrial	co2[c] <==> co2[m]	Transport, Mitochondrial	Cytosol, Mitochondria		Reversible
PIt2m	phosphate transporter, mitochondrial	h[c] + pi[c] <==> h[m] + pi[m]	Transport, Mitochondrial	Cytosol, Mitochondria		Reversible
PYRt2m	pyruvate mitochondrial transport via proton symport	h[c] + pyr[c] <==> h[m] + pyr[m]	Transport, Mitochondrial	Cytosol, Mitochondria		Reversible
H2Otm	H2O transport, mitochondrial	h2o[c] <==> h2o[m]	Transport, Mitochondrial	Cytosol, Mitochondria		Reversible
CITtbm	citrate transport, mitochondrial	cit[c] + pep[m] <==> cit[m] + pep[c]	Transport, Mitochondrial	Cytosol, Mitochondria		Reversible
PSERT	phosphoserine transaminase	[c] : 3php + glu-L --> akg + pser-L	Glycine, Serine, and Threonine Metabolism	Cytosol	2.6.1.52	Irreversible
SUCOASm	Succinate--CoA ligase (ADP-forming)	[m] : atp + coa + succ <==> adp + pi + succoa	Citric Acid Cycle	Mitochondria	6.2.1.5	Reversible
MALtm	malate transport, mitochondrial	mal-L[c] + pi[m] <==> mal-L[m] + pi[c]	Transport, Mitochondrial	Cytosol, Mitochondria		Reversible
HCO3Em	HCO3 equilibration reaction	[m] : co2 + h2o <==> h + hco3	Urea cycle/amino group metabolism	Mitochondria		Reversible
DPGase	Diphosphoglycerate phosphatase	[c] : 23dpg + h2o --> 3pg + pi	Glycolysis/Gluconeogenesis	Cytosol	3.1.3.13	Irreversible
O2tm	O2 transport (diffusion)	o2[c] <==> o2[m]	Transport, Mitochondrial	Cytosol, Mitochondria		Reversible
CITtam	citrate transport, mitochondrial	cit[c] + mal-L[m] <==> cit[m] + mal-L[c]	Transport, Mitochondrial	Cytosol, Mitochondria		Reversible
H2Otn	H2O transport, nuclear	h2o[n] <==> h2o[c]	Transport, Nuclear	Cytosol, Nucleus		Reversible
H2CO3D	carboxylic acid dissociation	[c] : co2 + h2o <==> h2co3	Miscellaneous	Cytosol	4.2.1.1	Reversible
UGLT	UDPglucose--hexose-1-phosphate uridylyltransferase	[c] : gal1p + udpg <==> g1p + udpgal	Galactose metabolism	Cytosol	2.7.7.12	Reversible
SUCD1m	succinate dehydrogenase	[m] : fad + succ <==> fadh2 + fum	Citric Acid Cycle	Mitochondria	1.3.99.1	Reversible
G6PDH2r	glucose 6-phosphate dehydrogenase	[c] : g6p + nadp <==> 6pgl + h + nadph	Pentose Phosphate Pathway	Cytosol	1.1.1.49	Reversible
ME1m	malic enzyme (NAD), mitochondrial	[m] : mal-L + nad --> co2 + nadh + pyr	Pyruvate Metabolism	Mitochondria	1.1.1.38	Irreversible
LCADi	lactaldehyde dehydrogenase	[c] : h2o + lald-L + nad --> (2) h + lac-L + nadh	Pyruvate Metabolism	Cytosol	1.2.1.21	Irreversible
ALCD2if	alcohol dehydrogenase, forward rxn (ethanol -> acetaldehyde)	[c] : etoh + nad --> acald + h + nadh	Glycolysis/Gluconeogenesis	Cytosol	1.1.1.1	Irreversible
ORNDC	Ornithine Decarboxylase	[c] : h + orn --> co2 + ptrc	Urea cycle/amino group metabolism	Cytosol	4.1.1.17	Irreversible
ABUTD	Aminobutyraldehyde dehydrogenase	[c] : 4abutn + h2o + nad --> 4abut + (2) h + nadh	beta-Alanine metabolism	Cytosol	1.2.1.19	Irreversible
GLUDC	Glutamate Decarboxylase	[c] : glu-L + h --> 4abut + co2	Glutamate metabolism	Cytosol	4.1.1.15	Irreversible
L-LACtm	L-lactate transport, mitochondrial	h[c] + lac-L[c] <==> h[m] + lac-L[m]	Transport, Mitochondrial	Cytosol, Mitochondria		Reversible
GMPS2	GMP synthase	[c] : atp + gln-L + h2o + xmp --> amp + glu-L + gmp + (2) h + ppi	Nucleotides	Cytosol	6.3.5.2	Irreversible
D-LACtm	D-lactate transport, mitochondrial	h[c] + lac-D[c] <==> h[m] + lac-D[m]	Transport, Mitochondrial	Cytosol, Mitochondria		Reversible
ADK3	adentylate kinase (GTP)	[c] : amp + gtp <==> adp + gdp	Nucleotides	Cytosol		Reversible
PYNP2r	pyrimidine-nucleoside phosphorylase (uracil)	[c] : pi + uri <==> r1p + ura	Pyrimidine Catabolism	Cytosol	2.4.2.2	Reversible
DURIPP	deoxyuridine phosphorylase	[c] : duri + pi <==> 2dr1p + ura	Nucleotides	Cytosol		Reversible
ALDD2xm	aldehyde dehydrogenase (acetylaldehyde, NAD), mitochondrial	[m] : acald + h2o + nad --> ac + (2) h + nadh	Glycolysis/Gluconeogenesis	Mitochondria	1.2.1.3	Irreversible
GLXtp	glyoxylate transport, peroxisomal	glx[c] <==> glx[x]	Transport, Peroxisomal	Cytosol, Peroxisome		Reversible
ACCOAtn	acetyl-CoA transport, nuclear	accoa[c] <==> accoa[n]	Transport, Nuclear	Cytosol, Nucleus		Reversible
COAtn	coenzyme A transport, nuclear	coa[c] <==> coa[n]	Transport, Nuclear	Cytosol, Nucleus		Reversible
ADK1m	adenylate kinase, mitochondrial	[m] : amp + atp <==> (2) adp	Nucleotides	Mitochondria	2.7.4.3	Reversible
ADK3m	adentylate kinase (GTP)	[m] : amp + gtp <==> adp + gdp	Nucleotides	Mitochondria		Reversible
AIRCr	phosphoribosylaminoimidazole carboxylase	[c] : air + co2 <==> 5aizc + h	IMP Biosynthesis	Cytosol	4.1.1.21	Reversible
TRDRm	thioredoxin reductase (NADPH)	[m] : h + nadph + trdox --> nadp + trdrd	Nucleotides	Mitochondria	1.8.1.9	Irreversible
NDPK9	nucleoside-diphosphate kinase (ATP:IDP)	[c] : atp + idp <==> adp + itp	Nucleotides	Cytosol	2.7.4.6	Reversible
UMPKn	UMP kinase, nuclear	[n] : atp + ump <==> adp + udp	Nucleotides	Nucleus		Reversible
ACGAMPM	phosphoacetylglucosamine mutase	[c] : acgam6p <==> acgam1p	Aminosugar Metabolism	Cytosol	5.4.2.3	Reversible
ASPTAm	aspartate transaminase	[m] : akg + asp-L <==> glu-L + oaa	Alanine and Aspartate Metabolism	Mitochondria	2.6.1.1	Reversible
P450SCC1m	cholesterol monooxygenase	[m] : chsterol + h + nadph + o2 <==> 20ahchsterol + h2o + nadp	Cholesterol Metabolism	Mitochondria		Reversible
GHMT2rm	glycine hydroxymethyltransferase, reversible, mitochondrial	[m] : ser-L + thf <==> gly + h2o + mlthf	Glycine, Serine, and Threonine Metabolism	Mitochondria	2.1.2.1	Reversible
GHMT2r	glycine hydroxymethyltransferase, reversible	[c] : ser-L + thf <==> gly + h2o + mlthf	Glycine, Serine, and Threonine Metabolism	Cytosol	2.1.2.1	Reversible
CYSTS	cystathionine beta-synthase	[c] : hcys-L + ser-L --> cyst-L + h2o	Methionine Metabolism	Cytosol	4.2.1.22	Irreversible
DCT	Dopachrome tautomerase	[c] : L-dpchrm <==> 56dihindlcrbxlt	Tyrosine metabolism	Cytosol	5.3.3.12	Reversible
CYSTGL	cystathionine g-lyase	[c] : cyst-L + h2o --> 2obut + cys-L + nh4	Cysteine Metabolism	Cytosol	4.4.1.1	Irreversible
LEUTAm	leucine transaminase, mitochondrial	[m] : akg + leu-L <==> 4mop + glu-L	Valine, Leucine, and Isoleucine Metabolism	Mitochondria	2.6.1.6	Reversible
ILETAm	isoleucine transaminase, mitochondrial	[m] : akg + ile-L <==> 3mop + glu-L	Valine, Leucine, and Isoleucine Metabolism	Mitochondria	2.6.1.42	Reversible
AGPRim	N-acetyl-g-glutamyl-phosphate reductase, irreversible, mitochondrial	[m] : acg5p + h + nadph --> acg5sa + nadp + pi	Urea cycle/amino group metabolism	Mitochondria	1.2.1.38	Irreversible
SPRMS	spermine synthase	[c] : ametam + spmd --> 5mta + h + sprm	Urea cycle/amino group metabolism	Cytosol	2.5.1.22	Irreversible
TRPO2	L-Tryptophan:oxygen 2,3-oxidoreductase (decyclizing)	[c] : o2 + trp-L --> Lfmkynr	Tryptophan metabolism	Cytosol	1.13.11.11	Irreversible
PCLAD	picolinic acid decarboxylase	[c] : cmusa + h --> am6sa + co2	Tryptophan metabolism	Cytosol	4.1.1.45	Irreversible
AM6SAD	aminomuconate-semialdehyde dehydrogenase	[c] : am6sa + h2o + nad --> amuco + (2) h + nadh	Tryptophan metabolism	Cytosol	1.2.1.32	Irreversible
TYRTAm	tyrosine transaminase, mitochondrial	[m] : akg + tyr-L <==> 34hpp + glu-L	Tyrosine metabolism	Mitochondria	2.6.1.5	Reversible
GTHP	glutathione peroxidase	[c] : (2) gthrd + h2o2 <==> gthox + (2) h2o	Glutathione Metabolism	Cytosol	1.11.1.9	Reversible
GTHO	glutathione oxidoreductase	[c] : gthox + h + nadph --> (2) gthrd + nadp	Glutamate metabolism	Cytosol	1.8.1.7	Irreversible
APRTO2	N-acetylputrescine: oxygen oxireductase (deaminating)	[c] : aprut + h2o + o2 --> h2o2 + n4abutn + nh4	Arginine and Proline Metabolism	Cytosol	1.4.3.4	Irreversible
NABTNO	N4-Acetylaminobutanal:NAD+ oxidoreductase	[c] : h2o + n4abutn + nad --> 4aabutn + (2) h + nadh	Arginine and Proline Metabolism	Cytosol	1.2.1.3	Irreversible
ACACT1r	acetyl-CoA C-acetyltransferase	[c] : (2) accoa <==> aacoa + coa	Tryptophan metabolism	Cytosol	2.3.1.9	Reversible
THFtm	5,6,7,8-Tetrahydrofolate transport, diffusion, mitochondrial	thf[c] <==> thf[m]	Transport, Mitochondrial	Cytosol, Mitochondria		Reversible
PROtm	L-proline transport, mitochondrial	pro-L[c] <==> pro-L[m]	Transport, Mitochondrial	Cytosol, Mitochondria		Reversible
GLUt2m	L-glutamate reversible transport via proton symport, mitochondrial	glu-L[c] + h[c] <==> glu-L[m] + h[m]	Transport, Mitochondrial	Cytosol, Mitochondria		Reversible
ACRNtm	O-acetylcarnintine transport into mitochondria via diffusion	acrn[c] --> acrn[m]	Transport, Mitochondrial	Cytosol, Mitochondria		Irreversible
CRNtim	L-carnitine transport out of mitochondria via diffusion	crn[m] --> crn[c]	Transport, Mitochondrial	Cytosol, Mitochondria		Irreversible
CPPPGO	coproporphyrinogen oxidase (O2 required)	[c] : cpppg3 + (2) h + o2 --> (2) co2 + (2) h2o + pppg9	Heme Biosynthesis	Cytosol	1.3.3.3	Irreversible
EHGLAT	L-erythro-4-Hydroxyglutamate:2-oxoglutarate aminotransferase	[c] : akg + e4hglu --> 4h2oglt + glu-L	Arginine and Proline Metabolism	Cytosol	2.6.1.1	Irreversible
4HGLSDm	L-4-hydroxyglutamate semialdehyde dehydrogenase, mitochondrial	[m] : 4hglusa + h2o + nad <==> e4hglu + (2) h + nadh	Arginine and Proline Metabolism	Mitochondria	1.5.1.12	Reversible
EHGLATm	L-erythro-4-Hydroxyglutamate:2-oxoglutarate aminotransferase, mitochondrial	[m] : akg + e4hglu --> 4h2oglt + glu-L	Arginine and Proline Metabolism	Mitochondria	2.6.1.1	Irreversible
CO2tn	CO2 nuclear transport via diffusion	co2[n] <==> co2[c]	Transport, Nuclear	Cytosol, Nucleus		Reversible
H2O2tp	hydrogen peroxide peroxisomal transport via diffusion	h2o2[c] <==> h2o2[x]	Transport, Peroxisomal	Cytosol, Peroxisome		Reversible
COAtp	coenzyme A transport, peroxisomal	coa[c] <==> coa[x]	Transport, Peroxisomal	Cytosol, Peroxisome		Reversible
4ABUTtm	4-aminobutanoate mitochondrial transport via diffusion	4abut[c] <==> 4abut[m]	Transport, Mitochondrial	Cytosol, Mitochondria		Reversible
PYDXNK	pyridoxine kinase	[c] : atp + pydxn --> adp + h + pdx5p	Vitamin B6 Metabolism	Cytosol	2.7.1.35	Irreversible
PYDAMK	pyridoxamine kinase	[c] : atp + pydam --> adp + h + pyam5p	Vitamin B6 Metabolism	Cytosol	2.7.1.35	Irreversible
PYDXK	pyridoxal kinase	[c] : atp + pydx --> adp + h + pydx5p	Vitamin B6 Metabolism	Cytosol	2.7.1.35	Irreversible
PDX5PO	pyridoxine 5'-phosphate oxidase	[c] : o2 + pdx5p <==> h2o2 + pydx5p	Vitamin B6 Metabolism	Cytosol	1.4.3.5	Reversible
HYPOE	hypothetical enyme	[c] : h2o + pyam5p --> pi + pydam	Vitamin B6 Metabolism	Cytosol		Irreversible
NNATm	nicotinate-nucleotide adenylyltransferase, mitochondrial	[m] : atp + h + nicrnt --> dnad + ppi	NAD Metabolism	Mitochondria	2.7.7.18	Irreversible
NMNATm	nicotinamide-nucleotide adenylyltransferase, mitochondrial	[m] : atp + h + nmn --> nad + ppi	NAD Metabolism	Mitochondria	2.7.7.1	Irreversible
ALASm	5-aminolevulinate synthase	[m] : gly + h + succoa --> 5aop + co2 + coa	Glycine, Serine, and Threonine Metabolism	Mitochondria	2.3.1.37	Irreversible
DHFtm	dihydrofolate reversible mitochondrial transport	dhf[c] <==> dhf[m]	Transport, Mitochondrial	Cytosol, Mitochondria		Reversible
5AOPtm	5-Aminolevulinate mitochondrial transport	5aop[c] <==> 5aop[m]	Heme Biosynthesis	Cytosol, Mitochondria		Reversible
PPPG9tm	protoporphyrinogen IX mitochondrial transport	pppg9[c] <==> pppg9[m]	Heme Biosynthesis	Cytosol, Mitochondria		Reversible
FCLTm	Ferrochelatase, mitochondrial	[m] : fe2 + ppp9 --> (2) h + pheme	Heme Biosynthesis	Mitochondria	4.99.1.1	Irreversible
PYDXPP	Pyridoxal 5-phosphate phosphatase	[c] : h2o + pydx5p --> pi + pydx	Vitamin B6 Metabolism	Cytosol		Irreversible
PDXPP	Pyridoxine 5-phosphate phosphatase	[c] : h2o + pdx5p --> pi + pydxn	Vitamin B6 Metabolism	Cytosol		Irreversible
MDRPD	5-Methylthio-5-deoxy-D-ribulose 1-phosphate dehydratase	[c] : 5mdru1p --> dkmpp + h2o	Arginine and Proline Metabolism	Cytosol		Irreversible
DKMPPD	2,3-diketo-5-methylthio-1-phosphopentane degradation reaction	[c] : dkmpp + h2o + o2 --> 2kmb + for + (2) h + pi	Arginine and Proline Metabolism	Cytosol		Irreversible
FACOAL161	fatty-acid--CoA ligase (hexadecenoate)	[c] : atp + coa + hdcea <==> amp + hdcoa + ppi	Fatty acid activation	Cytosol	6.2.1.3	Reversible
ACOAO7p	acyl-CoA oxidase (hexadecanoyl-CoA), peroxisomal	[x] : o2 + pmtcoa --> h2o2 + hdd2coa	Fatty Acid Metabolism	Peroxisome	1.3.3.6	Irreversible
ACACT8p	acetyl-CoA acyltransferase (hexadecanoyl-CoA), peroxisomal	[x] : 3ohodcoa + coa --> accoa + pmtcoa	Fatty Acid Metabolism	Peroxisome	2.3.1.16	Irreversible
ACACT7p	acetyl-CoA acyltransferase (tetradecanoyl-CoA), peroxisomal	[x] : 3ohdcoa + coa --> accoa + tdcoa	Fatty Acid Metabolism	Peroxisome	2.3.1.16	Irreversible
ACACT6p	acetyl-CoA C-acetyltransferase (dodecanoyl), peroxisomal	[x] : 3otdcoa + coa --> accoa + ddcacoa	Fatty Acid Metabolism	Peroxisome	2.3.1.16	Irreversible
ACACT5p	acetyl-CoA C-acyltransferase (decanoyl-CoA), peroxisomal	[x] : 3oddcoa + coa --> accoa + dcacoa	Fatty Acid Metabolism	Peroxisome	2.3.1.16	Irreversible
ACACT4p	acetyl-CoA C-acetyltransferase (octanoyl-CoA), peroxisomal	[x] : 3odcoa + coa --> accoa + occoa	Fatty Acid Metabolism	Peroxisome	2.3.1.16	Irreversible
SERPT	serine C-palmitoyltransferase	[c] : h + pmtcoa + ser-L --> 3dsphgn + co2 + coa	Sphingolipid Metabolism	Cytosol	2.3.1.50	Irreversible
3DSPHR	3-Dehydrosphinganine reductase	[c] : 3dsphgn + h + nadph --> nadp + sphgn	Sphingolipid Metabolism	Cytosol	1.1.1.102	Irreversible
FAS100COA	fatty acyl-CoA synthase (n-C10:0CoA)	[c] : (3) h + malcoa + (2) nadph + occoa --> co2 + coa + dcacoa + h2o + (2) nadp	Fatty acid elongation	Cytosol	2.3.1.86	Irreversible
FAS80COA_L	fatty acyl-CoA synthase (n-C8:0CoA), lumped reaction	[c] : accoa + (9) h + (3) malcoa + (6) nadph --> (3) co2 + (3) coa + (3) h2o + (6) nadp + occoa	Fatty acid elongation	Cytosol	2.3.1.86	Irreversible
FAS120COA	fatty-acyl-CoA synthase (n-C12:0CoA)	[c] : dcacoa + (3) h + malcoa + (2) nadph --> co2 + coa + ddcacoa + h2o + (2) nadp	Fatty acid elongation	Cytosol	2.3.1.86	Irreversible
FAS140COA	fatty-acyl-CoA synthase (n-C14:0CoA)	[c] : ddcacoa + (3) h + malcoa + (2) nadph --> co2 + coa + h2o + (2) nadp + tdcoa	Fatty acid elongation	Cytosol	2.3.1.86	Irreversible
FAS160COA	fatty-acyl-CoA synthase (n-C16:0CoA)	[c] : (3) h + malcoa + (2) nadph + tdcoa --> co2 + coa + h2o + (2) nadp + pmtcoa	Fatty acid elongation	Cytosol	2.3.1.86	Irreversible
FAS180COA	fatty-acyl-CoA synthase (n-C18:0CoA)	[c] : (3) h + malcoa + (2) nadph + pmtcoa --> co2 + coa + h2o + (2) nadp + stcoa	Fatty acid elongation	Cytosol	2.3.1.86	Irreversible
GCALDD	Glycolaldehyde dehydrogenase	[c] : gcald + h2o + nad --> glyclt + (2) h + nadh	Glyoxylate and Dicarboxylate Metabolism	Cytosol	1.2.1.21	Irreversible
SQLEr	Squalene epoxidase, endoplasmic reticular (NADP)	[r] : h + nadph + o2 + sql --> Ssq23epx + h2o + nadp	Cholesterol Metabolism	Endoplasmic Reticulum	1.14.99.7	Irreversible
GLYC3Ptm	glycerol-3-phosphate shuttle	glyc3p[c] --> glyc3p[m]	Transport, Mitochondrial	Cytosol, Mitochondria		Irreversible
HMGCOAtm	Hydroxymethylglutaryl-CoA reversible mitochondrial transport	hmgcoa[c] <==> hmgcoa[m]	Transport, Mitochondrial	Cytosol, Mitochondria		Reversible
DRBK	Deoxyribokinase	[c] : atp + drib --> 2dr5p + adp + h	Pentose Phosphate Pathway	Cytosol	2.7.1.15	Irreversible
SBTD_D2	D-sorbitol dehydrogenase (D-fructose producing)	[c] : nad + sbt-D --> fru + h + nadh	Fructose and Mannose Metabolism	Cytosol	1.1.1.14	Irreversible
ARABR	arabinose reductase	[c] : arab-L + h + nadph --> abt + nadp	Pentose and Glucuronate Interconversions	Cytosol	1.1.1.21	Irreversible
ACACT9p	acetyl-CoA acyltransferase (tetracosanoyl-CoA), peroxisomal	[x] : 3ohxccoa + coa --> accoa + ttccoa	Fatty Acid Metabolism	Peroxisome	2.3.1.16	Irreversible
ACt2m	acetate mitochondrial transport via proton symport	ac[c] + h[c] <==> ac[m] + h[m]	Transport, Mitochondrial	Cytosol, Mitochondria		Reversible
H2Otp	H2O transport, peroxisomal	h2o[c] <==> h2o[x]	Transport, Peroxisomal	Cytosol, Peroxisome		Reversible
CO2tp	CO2 peroxisomal transport	co2[c] <==> co2[x]	Transport, Peroxisomal	Cytosol, Peroxisome		Reversible
CO2tg	CO2 Golgi transport	co2[c] <==> co2[g]	Transport, Golgi Apparatus	Cytosol, Golgi Apparatus		Reversible
O2ter	O2 transport, endoplasmic reticulum	o2[c] <==> o2[r]	Transport, Endoplasmic Reticular	Cytosol, Endoplasmic Reticulum		Reversible
H2Oter	H2O endoplasmic reticulum transport	h2o[c] <==> h2o[r]	Transport, Endoplasmic Reticular	Cytosol, Endoplasmic Reticulum		Reversible
CITL	Citrate lyase	[c] : cit --> ac + oaa	Citric Acid Cycle	Cytosol	4.1.3.6	Irreversible
GMAND	GDP-D-mannose dehydratase	[c] : gdpmann --> gdpddman + h2o	Fructose and Mannose Metabolism	Cytosol	4.2.1.47	Irreversible
MMCD	Methylmalonyl-CoA decarboxylase	[c] : h + mmcoa-S --> co2 + ppcoa	Valine, Leucine, and Isoleucine Metabolism	Cytosol	4.1.1.41	Irreversible
CO2ter	CO2 endoplasmic reticular transport via diffusion	co2[c] <==> co2[r]	Transport, Endoplasmic Reticular	Cytosol, Endoplasmic Reticulum		Reversible
MCITS	2-methylcitrate synthase	[c] : h2o + oaa + ppcoa --> 2mcit + coa + h	Propanoate Metabolism	Cytosol	4.1.3.31	Irreversible
G6Pter	glucose 6-phosphate endoplasmic reticular transport via diffusion	g6p[c] <==> g6p[r]	Transport, Endoplasmic Reticular	Cytosol, Endoplasmic Reticulum		Reversible
AHCYStn	S-adenosyl-L-homocysteine nuclear transport	ahcys[c] <==> ahcys[n]	Transport, Nuclear	Cytosol, Nucleus		Reversible
AMETtn	S-adenosyl-L-methionine nuclear transport	amet[c] <==> amet[n]	Transport, Nuclear	Cytosol, Nucleus		Reversible
DUMPtn	dUMP nuclear transport	dump[c] <==> dump[n]	Transport, Nuclear	Cytosol, Nucleus		Reversible
PYRt2p	pyruvate peroxisomal transport via proton symport	h[c] + pyr[c] <==> h[x] + pyr[x]	D-alanine metabolism	Cytosol, Peroxisome		Reversible
NH4tp	ammonia peroxisomal transport	nh4[c] <==> nh4[x]	Transport, Peroxisomal	Cytosol, Peroxisome		Reversible
GCCcm	glycine-cleavage complex (lipoylprotein), mitochondrial	[m] : dhlpro + nad <==> h + lpro + nadh	Glycine, Serine, and Threonine Metabolism	Mitochondria	1.8.1.4	Reversible
GCC2cm	glycine-cleavage complex (lipoamide), mitochondrial	[m] : dhlam + nad <==> h + lpam + nadh	Glycine, Serine, and Threonine Metabolism	Mitochondria	1.8.1.4	Reversible
UDPGD	UDPglucose 6-dehydrogenase	[c] : h2o + (2) nad + udpg --> (3) h + (2) nadh + udpglcur	Starch and Sucrose Metabolism	Cytosol	1.1.1.22	Irreversible
PGLYCP	Phosphoglycolate phosphatase	[c] : 2pglyc + h2o --> glyclt + pi	Glyoxylate and Dicarboxylate Metabolism	Cytosol	3.1.3.18	Irreversible
GLYCLTDy	Glycolate dehydrogenase (NADP)	[c] : glx + h + nadph --> glyclt + nadp	Glyoxylate and Dicarboxylate Metabolism	Cytosol	1.1.1.26	Irreversible
HPYRRy	Hydroxypyruvate reductase (NADPH)	[c] : h + hpyr + nadph --> glyc-R + nadp	Glyoxylate and Dicarboxylate Metabolism	Cytosol		Irreversible
TDPGDH	dTDPglucose 4,6-dehydratase	[c] : dtdpglu --> dtdp4d6dg + h2o	Nucleotide Sugar Metabolism	Cytosol	4.2.1.46	Irreversible
G1PTT	glucose-1-phosphate thymidylyltransferase	[c] : dttp + g1p + h --> dtdpglu + ppi	Nucleotide Sugar Metabolism	Cytosol	2.7.7.24	Irreversible
TDPDRE	dTDP-4-dehydrorhamnose 3,5-epimerase	[c] : dtdp4d6dg --> dtdp4d6dm	Nucleotide Sugar Metabolism	Cytosol	5.1.3.13	Irreversible
TDPDRR	dTDP-4-dehydrorhamnose reductase	[c] : dtdp4d6dm + h + nadph --> dtdprmn + nadp	Nucleotide Sugar Metabolism	Cytosol	1.1.1.133	Irreversible
GPDDA1	Glycerophosphodiester phosphodiesterase (Glycerophosphocholine)	[c] : g3pc + h2o --> chol + glyc3p + h	Glycerophospholipid Metabolism	Cytosol	3.1.4.46	Irreversible
MAN1PT2	mannose-1-phosphate guanylyltransferase (GDP)	[c] : gdp + h + man1p --> gdpmann + pi	Fructose and Mannose Metabolism	Cytosol	2.7.7.22	Irreversible
ADNCYC	adenylate cyclase	[c] : atp --> camp + ppi	Nucleotides	Cytosol	4.6.1.1	Irreversible
MI1PP	myo-inositol 1-phosphatase	[c] : h2o + mi1p-D --> inost + pi	Inositol Phosphate Metabolism	Cytosol	3.1.3.25	Irreversible
PDE1	3',5'-cyclic-nucleotide phosphodiesterase	[c] : camp + h2o --> amp + h	Nucleotides	Cytosol	3.1.4.17	Irreversible
MI1PS	myo-Inositol-1-phosphate synthase	[c] : g6p --> mi1p-D	Inositol Phosphate Metabolism	Cytosol	5.5.1.4	Irreversible
ACCOAL	acetate-CoA ligase (ADP-forming)	[c] : atp + coa + ppa --> adp + pi + ppcoa	Propanoate Metabolism	Cytosol	6.2.1.13	Irreversible
AMCOXO	2-aminomuconate reductase	[c] : amuco + h + h2o + nadph --> 2oxoadp + nadp + nh4	Tryptophan metabolism	Cytosol		Irreversible
PDE4	3',5'-cyclic-nucleotide phosphodiesterase	[c] : 35cgmp + h2o --> gmp + h	Nucleotides	Cytosol	3.1.4.17	Irreversible
HKYNH	3-Hydroxy-L-kynurenine hydrolase	[c] : h2o + hLkynr --> 3hanthrn + ala-L	Tryptophan metabolism	Cytosol	3.7.1.3	Irreversible
3HAO	3-hydroxyanthranilate 3,4-dioxygenase	[c] : 3hanthrn + o2 --> cmusa + h	Tryptophan metabolism	Cytosol	1.13.11.6	Irreversible
MACACI	maleylacetoacetate isomerase	[c] : 4mlacac --> 4fumacac	Tyrosine metabolism	Cytosol	5.2.1.2	Irreversible
FUMAC	fumarylacetoacetase	[c] : 4fumacac + h2o --> acac + fum + h	Tyrosine metabolism	Cytosol	3.7.1.2	Irreversible
HGNTOR	Homogentisate:oxygen 1,2-oxidoreductase (decyclizing)	[c] : hgentis + o2 --> 4mlacac + h	Tyrosine metabolism	Cytosol	1.13.11.5	Irreversible
BETALDHx	betaine-aldehyde dehydrogenase	[c] : betald + h2o + nad --> glyb + (2) h + nadh	Glycine, Serine, and Threonine Metabolism	Cytosol	1.2.1.8	Irreversible
KYN	kynureninase	[c] : Lkynr + h2o --> ala-L + anth + h	Tryptophan metabolism	Cytosol	3.7.1.3	Irreversible
FKYNH	N-Formyl-L-kynurenine amidohydrolase	[c] : Lfmkynr + h2o --> Lkynr + for + h	Tryptophan metabolism	Cytosol	3.5.1.9	Irreversible
FALDH	formaldehyde dehydrogenase	[c] : fald + gthrd + nad <==> Sfglutth + h + nadh	Tyrosine metabolism	Cytosol	1.2.1.1	Reversible
SFGTH	S-Formylglutathione hydralase	[c] : Sfglutth + h2o <==> for + gthrd + h	Tyrosine metabolism	Cytosol	3.1.2.12	Reversible
CHLPCTD	choline phosphate cytididyltransferase	[c] : cholp + ctp + h --> cdpchol + ppi	Glycerophospholipid Metabolism	Cytosol	2.7.7.15	Irreversible
CHOLK	Choline kinase	[c] : atp + chol --> adp + cholp + h	Glycerophospholipid Metabolism	Cytosol	2.7.1.32	Irreversible
ETHAK	Ethanolamine kinase	[c] : atp + etha --> adp + ethamp + h	Glycerophospholipid Metabolism	Cytosol	2.7.1.82	Irreversible
PETHCT	phosphoethanolamine cytidyltransferase	[c] : ctp + ethamp + h --> cdpea + ppi	Glycerophospholipid Metabolism	Cytosol	2.7.7.14	Irreversible
34HPPOR	4-Hydroxyphenylpyruvate:oxygen oxidoreductase	[c] : 34hpp + o2 --> co2 + hgentis	Tyrosine metabolism	Cytosol	1.13.11.27	Irreversible
ALDD20x	aldehyde dehydrogenase (indole-3-acetaldehyde, NAD)	[c] : h2o + id3acald + nad --> (2) h + ind3ac + nadh	Tryptophan metabolism	Cytosol		Irreversible
ALDD20xm	aldehyde dehydrogenase (indole-3-acetaldehyde, NAD), mitochondrial	[m] : h2o + id3acald + nad --> (2) h + ind3ac + nadh	Tryptophan metabolism	Mitochondria		Irreversible
SLCBK1	sphingolipid long chain base kinase (sphinganine)	[c] : atp + sphgn --> adp + h + sph1p	Sphingolipid Metabolism	Cytosol		Irreversible
MLTG1	Maltodextrin glucosidase (maltotriose)	[c] : h2o + malttr --> glc-D + malt	Starch and Sucrose Metabolism	Cytosol		Irreversible
SPODM	superoxide dismutase	[c] : (2) h + (2) o2s --> h2o2 + o2	ROS Detoxification	Cytosol	1.15.1.1	Irreversible
PEAMNO	Phenethylamine oxidase	[c] : h2o + o2 + peamn --> h2o2 + nh4 + pacald	Phenylalanine metabolism	Cytosol	1.4.3.6	Irreversible
ALDD19x	aldehyde dehydrogenase (phenylacetaldehyde, NAD)	[c] : h2o + nad + pacald --> (2) h + nadh + pac	Phenylalanine metabolism	Cytosol	1.2.1.39	Irreversible
PACCOAL	phenylacetate-CoA ligase	[c] : atp + coa + pac --> amp + phaccoa + ppi	Phenylalanine metabolism	Cytosol	6.2.1.30	Irreversible
FBA2	D-Fructose 1-phosphate D-glyceraldehyde-3-phosphate-lyase	[c] : f1p <==> dhap + glyald	Fructose and Mannose Metabolism	Cytosol	4.1.2.13	Reversible
SELNPS	Selenophosphate synthase	[c] : atp + h2o + seln --> amp + pi + selnp	Selenoamino acid metabolism	Cytosol	2.7.9.3	Irreversible
AMANK	N-acetyl-D-mannosamine kinase	[c] : acmana + atp --> acmanap + adp + h	Aminosugar Metabolism	Cytosol	2.7.1.60	Irreversible
ATPtm	ADP/ATP transporter, mitochondrial	adp[c] + atp[m] --> adp[m] + atp[c]	Transport, Mitochondrial	Cytosol, Mitochondria		Irreversible
CRNCARtp	carnitine-acetylcarnitine carrier, peroxisomal	acrn[x] + crn[c] --> acrn[c] + crn[x]	Transport, Peroxisomal	Cytosol, Peroxisome		Irreversible
ORNt3m	ornithine mitochondrial transport via proton antiport	h[c] + orn[m] <==> h[m] + orn[c]	Transport, Mitochondrial	Cytosol, Mitochondria		Reversible
CATp	catalase A, peroxisomal	[x] : (2) h2o2 --> (2) h2o + o2	Miscellaneous	Peroxisome	1.11.1.6	Irreversible
ITCOALm	Itaconate--CoA ligase (ADP-forming), mitochondrial	[m] : atp + coa + itacon <==> adp + itaccoa + pi	C5-Branched dibasic acid metabolism	Mitochondria	6.2.1.5	Reversible
ICDHy	isocitrate dehydrogenase (NADP)	[c] : icit + nadp --> akg + co2 + nadph	Citric Acid Cycle	Cytosol	1.1.1.42	Irreversible
DPGM	Diphosphoglyceromutase	[c] : 13dpg <==> 23dpg + h	Glycolysis/Gluconeogenesis	Cytosol		Reversible
PEPCK	Phosphoenolpyruvate carboxykinase (GTP)	[c] : gtp + oaa --> co2 + gdp + pep	Glycolysis/Gluconeogenesis	Cytosol	4.1.1.32	Irreversible
ACACT1rm	acetyl-CoA C-acetyltransferase, mitochondrial	[m] : (2) accoa <==> aacoa + coa	Tryptophan metabolism	Mitochondria	2.3.1.9	Reversible
ACOATA	Acetyl-CoA ACP transacylase	[c] : ACP + accoa <==> acACP + coa	Fatty Acid Metabolism	Cytosol	2.3.1.38	Reversible
FA120ACPH	fatty-acyl-ACP hydrolase	[c] : ddcaACP + h2o <==> ACP + ddca + h	Fatty Acid Metabolism	Cytosol	3.1.2.14	Reversible
FA140ACPH	fatty-acyl-ACP hydrolase	[c] : h2o + myrsACP <==> ACP + h + ttdca	Fatty Acid Metabolism	Cytosol	3.1.2.14	Reversible
FA141ACPH	fatty-acyl-ACP hydrolase	[c] : h2o + tdeACP <==> ACP + h + ttdcea	Fatty Acid Metabolism	Cytosol	3.1.2.14	Reversible
FA160ACPH	fatty-acyl-ACP hydrolase	[c] : h2o + palmACP <==> ACP + h + hdca	Fatty Acid Metabolism	Cytosol	3.1.2.14	Reversible
FA180ACPH	fatty-acyl-ACP hydrolase	[c] : h2o + ocdcaACP <==> ACP + h + ocdca	Fatty Acid Metabolism	Cytosol	3.1.2.14	Reversible
FA161ACPH	fatty-acyl-ACP hydrolase	[c] : h2o + hdeACP <==> ACP + h + hdcea	Fatty Acid Metabolism	Cytosol	3.1.2.14	Reversible
FA181ACPH	fatty-acyl-ACP hydrolase	[c] : h2o + octeACP <==> ACP + h + ocdcea	Fatty Acid Metabolism	Cytosol	3.1.2.14	Reversible
FA182ACPH	fatty-acyl-ACP hydrolase	[c] : h2o + ocdcyaACP <==> ACP + h + ocdcya	Fatty Acid Metabolism	Cytosol	3.1.2.14	Reversible
PPPGOm	protoporphyrinogen oxidase, mitochondrial	[m] : (3) o2 + (2) pppg9 --> (6) h2o + (2) ppp9	Heme Biosynthesis	Mitochondria	1.3.3.4	Irreversible
MCOATA	Malonyl-CoA-ACP transacylase	[c] : ACP + malcoa <==> coa + malACP	Fatty Acid Metabolism	Cytosol	2.3.1.39	Reversible
MCOATAm	Malonyl-CoA-ACP transacylase, mitochondrial	[m] : ACP + malcoa <==> coa + malACP	Fatty Acid Metabolism	Mitochondria	2.3.1.39	Reversible
TMDPPK	thiamine-diphosphate kinase	[c] : atp + thmpp --> adp + thmtp	Thiamine Metabolism	Cytosol	2.7.4.15	Irreversible
SBTR	D-sorbitol reductase	[c] : glc-D + h + nadph --> nadp + sbt-D	Fructose and Mannose Metabolism	Cytosol	1.1.1.21	Irreversible
LNS14DM	cytochrome P450 lanosterol 14-alpha-demethylase (NADP)	[c] : (2) h + lanost + (3) nadph + (3) o2 --> 44mctr + for + (4) h2o + (3) nadp	Cholesterol Metabolism	Cytosol	1.14.14.1	Irreversible
GUAD	guanine deaminase	[c] : gua + h + h2o --> nh4 + xan	Purine Catabolism	Cytosol	3.5.4.3	Irreversible
P5CDm	1-pyrroline-5-carboxylate dehydrogenase, mitochondrial	[m] : 1pyr5c + (2) h2o + nad --> glu-L + h + nadh	Glutamate metabolism	Mitochondria	1.5.1.12	Irreversible
ACGSm	N-acteylglutamate synthase, mitochondrial	[m] : accoa + glu-L --> acglu + coa + h	Urea cycle/amino group metabolism	Mitochondria	2.3.1.1	Irreversible
ACODA	acetylornithine deacetylase	[c] : acorn + h2o --> ac + orn	Urea cycle/amino group metabolism	Cytosol	3.5.1.16	Irreversible
ADA	Adenosine deaminase	[c] : adn + h + h2o --> ins + nh4	Purine Catabolism	Cytosol	3.5.4.4	Irreversible
DADA	Deoxyadenosine deaminase	[c] : dad-2 + h + h2o --> din + nh4	Nucleotides	Cytosol		Irreversible
ADSS	adenylosuccinate synthase	[c] : asp-L + gtp + imp --> dcamp + gdp + (2) h + pi	Nucleotides	Cytosol	6.3.4.4	Irreversible
AGDC	N-acetylglucosamine-6-phosphate deacetylase	[c] : acgam6p + h2o --> ac + gam6p	Aminosugar Metabolism	Cytosol	3.5.1.25	Irreversible
CSND	Cytosine deaminase	[c] : csn + h + h2o --> nh4 + ura	Pyrimidine Catabolism	Cytosol	3.5.4.1	Irreversible
CYTD	cytidine deaminase	[c] : cytd + h + h2o --> nh4 + uri	Pyrimidine Catabolism	Cytosol	3.5.4.5	Irreversible
DCYTD	deoxycytidine deaminase	[c] : dcyt + h + h2o --> duri + nh4	Pyrimidine Catabolism	Cytosol	3.5.4.14	Irreversible
GF6PTA	glutamine-fructose-6-phosphate transaminase	[c] : f6p + gln-L --> gam6p + glu-L	Aminosugar Metabolism	Cytosol	2.6.1.16	Irreversible
GLNS	glutamine synthetase	[c] : atp + glu-L + nh4 --> adp + gln-L + h + pi	Glutamate metabolism	Cytosol	6.3.1.2	Irreversible
GLUCYS	gamma-glutamylcysteine synthetase	[c] : atp + cys-L + glu-L --> adp + glucys + h + pi	Glutathione Metabolism	Cytosol	6.3.2.2	Irreversible
GLUPRT	glutamine phosphoribosyldiphosphate amidotransferase	[c] : gln-L + h2o + prpp --> glu-L + ppi + pram	IMP Biosynthesis	Cytosol	2.4.2.14	Irreversible
GMPR	GMP reductase	[c] : gmp + (2) h + nadph --> imp + nadp + nh4	Nucleotides	Cytosol	1.7.1.7	Irreversible
GTHS	glutathione synthetase	[c] : atp + glucys + gly --> adp + gthrd + h + pi	Glutathione Metabolism	Cytosol	6.3.2.3	Irreversible
PPBNGS	porphobilinogen synthase	[c] : (2) 5aop --> h + (2) h2o + ppbng	Heme Biosynthesis	Cytosol	4.2.1.24	Irreversible
PRAGSr	phosphoribosylglycinamide synthase	[c] : atp + gly + pram <==> adp + gar + h + pi	IMP Biosynthesis	Cytosol	6.3.4.13	Reversible
PRFGS	phosphoribosylformylglycinamidine synthase	[c] : atp + fgam + gln-L + h2o --> adp + fpram + glu-L + h + pi	IMP Biosynthesis	Cytosol	6.3.5.3	Irreversible
KYN3OX	kynurenine 3-monooxygenase	[c] : Lkynr + h + nadph + o2 --> h2o + hLkynr + nadp	Tryptophan metabolism	Cytosol	1.14.13.9	Irreversible
PHCDm	L-1-pyrroline-3-hydroxy-5-carboxylate dehydrogenase	[m] : 1p3h5c + (2) h2o + nad --> e4hglu + h + nadh	Arginine and Proline Metabolism	Mitochondria	1.5.1.12	Irreversible
P5CR	pyrroline-5-carboxylate reductase	[c] : 1pyr5c + (2) h + nadph --> nadp + pro-L	Urea cycle/amino group metabolism	Cytosol	1.5.1.2	Irreversible
G5SADs	L-glutamate 5-semialdehyde dehydratase (spontaneous)	[c] : glu5sa --> 1pyr5c + h + h2o	Urea cycle/amino group metabolism	Cytosol		Irreversible
GARFT	phosphoribosylglycinamide formyltransferase	[c] : 10fthf + gar <==> fgam + h + thf	IMP Biosynthesis	Cytosol	2.1.2.2	Reversible
PRAIS	phosphoribosylaminoimidazole synthase	[c] : atp + fpram --> adp + air + (2) h + pi	IMP Biosynthesis	Cytosol	6.3.3.1	Irreversible
PRASCS	phosphoribosylaminoimidazolesuccinocarboxamide synthase	[c] : 5aizc + asp-L + atp <==> 25aics + adp + h + pi	IMP Biosynthesis	Cytosol	6.3.2.6	Reversible
PROD2	Proline dehydrogenase	[c] : fad + pro-L --> 1pyr5c + fadh2 + h	Arginine and Proline Metabolism	Cytosol	1.5.99.8	Irreversible
UNK3	2-keto-4-methylthiobutyrate transamination	[c] : 2kmb + glu-L --> akg + met-L	Arginine and Proline Metabolism	Cytosol		Irreversible
HPROxm	L-hydroxyproline dehydrogenase (NAD), mitochondrial	[m] : 4hpro-LT + nad --> 1p3h5c + (2) h + nadh	Arginine and Proline Metabolism	Mitochondria	1.5.1.12	Irreversible
PHCHGSm	L-1-Pyrroline-3-hydroxy-5-carboxylate spontaneous conversion to L-4-Hydroxyglutamate semialdehyde, mitochondrial	[m] : 1p3h5c + h + h2o <==> 4hglusa	Arginine and Proline Metabolism	Mitochondria		Reversible
AMPDA	Adenosine monophosphate deaminase	[c] : amp + h + h2o --> imp + nh4	Nucleotides	Cytosol		Irreversible
DCMPDA	dCMP deaminase	[c] : dcmp + h + h2o <==> dump + nh4	Pyrimidine Catabolism	Cytosol	3.5.4.12	Reversible
CTPS1	CTP synthase (NH3)	[c] : atp + nh4 + utp --> adp + ctp + (2) h + pi	Nucleotides	Cytosol	6.3.4.2	Irreversible
G5SADrm	L-glutamate 5-semialdehyde dehydratase, reversible, mitochondrial	[m] : glu5sa <==> 1pyr5c + h + h2o	Arginine and Proline Metabolism	Mitochondria		Reversible
PRO1x	proline oxidase (L-proline, NAD)	[c] : nad + pro-L --> 1pyr5c + (2) h + nadh	Arginine and Proline Metabolism	Cytosol	1.5.1.2	Irreversible
PRO1xm	proline oxidase (NAD), mitochondrial	[m] : nad + pro-L --> 1pyr5c + (2) h + nadh	Arginine and Proline Metabolism	Mitochondria		Irreversible
THMP	thiamin phosphatase	[c] : h2o + thmmp --> pi + thm	Thiamine Metabolism	Cytosol		Irreversible
TMDPK	thiamine diphosphokinase	[c] : atp + thm --> amp + h + thmpp	Thiamine Metabolism	Cytosol	2.7.6.2	Irreversible
FTHFCL	5-formethyltetrahydrofolate cyclo-ligase	[c] : 5fthf + atp --> adp + methf + pi	Folate Metabolism	Cytosol	6.3.3.2	Irreversible
10FTHFtm	10-Formyltetrahydrofolate mitochondrial transport via diffusion	10fthf[c] <==> 10fthf[m]	Transport, Mitochondrial	Cytosol, Mitochondria		Reversible
GCC2am	glycine-cleavage complex (lipoamide), mitochondrial	[m] : gly + h + lpam <==> alpam + co2	Glycine, Serine, and Threonine Metabolism	Mitochondria	1.4.4.2	Reversible
GCC2bim	glycine-cleavage system (lipoamide) irreversible, mitochondrial	[m] : alpam + thf --> dhlam + mlthf + nh4	Glycine, Serine, and Threonine Metabolism	Mitochondria	2.1.2.10	Irreversible
GCCam	glycine-cleavage complex (lipoylprotein), mitochondrial	[m] : gly + h + lpro <==> alpro + co2	Glycine, Serine, and Threonine Metabolism	Mitochondria	1.4.4.2	Reversible
GCCbim	glycine-cleavage complex (lipoylprotein) irreversible, mitochondrial	[m] : alpro + thf --> dhlpro + mlthf + nh4	Glycine, Serine, and Threonine Metabolism	Mitochondria	2.1.2.10	Irreversible
VALTAm	valine transaminase, mitochondiral	[m] : akg + val-L <==> 3mob + glu-L	Valine, Leucine, and Isoleucine Metabolism	Mitochondria	2.6.1.42	Reversible
FTHFLm	formate-tetrahydrofolate ligase, mitochondrial	[m] : atp + for + thf <==> 10fthf + adp + pi	Folate Metabolism	Mitochondria	6.3.4.3	Reversible
FTHFL	formate-tetrahydrofolate ligase	[c] : atp + for + thf <==> 10fthf + adp + pi	Folate Metabolism	Cytosol	6.3.4.3	Reversible
CSNATr	carnitine O-acetyltransferase	[c] : accoa + crn <==> acrn + coa	Carnitine shuttle	Cytosol	2.3.1.7	Reversible
CSNATp	carnitine O-acetyltransferase, reverse direction, peroxisomal	[x] : accoa + crn <==> acrn + coa	Fatty Acid Metabolism	Peroxisome	2.3.1.7	Reversible
AKGDm	2-oxoglutarate dehydrogenase	[m] : akg + coa + nad --> co2 + nadh + succoa	Citric Acid Cycle	Mitochondria	1.2.4.2	Irreversible
COAtm	CoA transporter	coa[c] <==> coa[m]	Transport, Mitochondrial	Cytosol, Mitochondria		Reversible
C160CPT1	carnitine O-palmitoyltransferase	[c] : crn + pmtcoa --> coa + pmtcrn	Carnitine shuttle	Cytosol	2.3.1.21	Irreversible
C180CPT1	carnitine O-stearoyl transferase	[c] : crn + stcoa --> coa + stcrn	Carnitine shuttle	Cytosol	2.3.1.21	Irreversible
C160CPT2	C160 transport into the mitochondria	[m] : coa + pmtcrn --> crn + pmtcoa	Carnitine shuttle	Mitochondria		Irreversible
C181CPT1	carnitine octadecenoyl transferase	[c] : crn + odecoa --> coa + odecrn	Carnitine shuttle	Cytosol	2.3.1.21	Irreversible
C180CPT2	carnitine O-stearoyl transferase	[m] : coa + stcrn --> crn + stcoa	Carnitine shuttle	Mitochondria		Irreversible
C181CRNt	C181 transport into the mitochondria	odecrn[c] --> odecrn[m]	Carnitine shuttle	Cytosol, Mitochondria		Irreversible
C180CRNt	C180 transport into the mitochondria	stcrn[c] --> stcrn[m]	Carnitine shuttle	Cytosol, Mitochondria		Irreversible
C160CRNt	C160 transport into the mitochondria	pmtcrn[c] --> pmtcrn[m]	Carnitine shuttle	Cytosol, Mitochondria		Irreversible
C181CPT2	carnitine octadecenoyl transferase	[m] : coa + odecrn --> crn + odecoa	Carnitine shuttle	Mitochondria		Irreversible
C204CPT1	carnitine C20:4 transferase	[c] : arachdcoa + crn --> arachdcrn + coa	Carnitine shuttle	Cytosol	2.3.1.21	Irreversible
C204CRNt	arachidonic acid transport into the mitochondria	arachdcrn[c] --> arachdcrn[m]	Carnitine shuttle	Cytosol, Mitochondria		Irreversible
C204CPT2	arachidonic acid transport into the mitochondria	[m] : arachdcrn + coa --> arachdcoa + crn	Carnitine shuttle	Mitochondria		Irreversible
C226CPT1	carnitine C22:6 transferase	[c] : c226coa + crn --> c226crn + coa	Carnitine shuttle	Cytosol	2.3.1.21	Irreversible
C226CRNt	C226 transport into the mitochondria	c226crn[c] --> c226crn[m]	Carnitine shuttle	Cytosol, Mitochondria		Irreversible
C226CPT2	C226 transport into the mitochondria	[m] : c226crn + coa --> c226coa + crn	Carnitine shuttle	Mitochondria		Irreversible
FAOXC160	Beta oxidation of long chain fatty acid	[m] : (7) coa + (7) fad + (7) h2o + (7) nad + pmtcoa --> (8) accoa + (7) fadh2 + (7) h + (7) nadh	Fatty acid oxidation	Mitochondria	1.3.99.3	Irreversible
FAOXC180	Beta oxidation of long chain fatty acid	[m] : coa + fad + h2o + nad + stcoa --> accoa + fadh2 + h + nadh + pmtcoa	Fatty acid oxidation	Mitochondria	1.3.99.3	Irreversible
FAOXC204	Beta oxidation of long chain fatty acid	[m] : arachdcoa + (9) coa + (5) fad + (9) h2o + (9) nad --> (10) accoa + (5) fadh2 + (9) h + (9) nadh	Fatty acid oxidation	Mitochondria	1.3.99.3	Irreversible
FAOXC226	Beta oxidation of long chain fatty acid	[m] : c226coa + (10) coa + (4) fad + (10) h2o + (10) nad --> (11) accoa + (4) fadh2 + (10) h + (10) nadh	Fatty acid oxidation	Mitochondria	1.3.99.3	Irreversible
NADH2-u10m	NADH dehydrogenase, mitochondrial	(5) h[m] + nadh[m] + q10[m] --> (4) h[c] + nad[m] + q10h2[m]	Oxidative Phosphorylation	Cytosol, Mitochondria	1.6.99.3	Irreversible
AKGMALtm	alpha-ketoglutarate/malate transporter	akg[m] + mal-L[c] <==> akg[c] + mal-L[m]	Transport, Mitochondrial	Cytosol, Mitochondria		Reversible
FACOAL160i	C160 fatty acid activation	[c] : atp + coa + hdca --> amp + pmtcoa + ppi	Fatty acid activation	Cytosol	6.2.1.3	Irreversible
FACOAL180i	C180 fatty acid activation	[c] : atp + coa + ocdca --> amp + ppi + stcoa	Fatty acid activation	Cytosol	6.2.1.3	Irreversible
FACOAL181i	C181 fatty acid activation	[c] : atp + coa + ocdcea --> amp + odecoa + ppi	Fatty acid activation	Cytosol	6.2.1.3	Irreversible
FACOAL204i	arachidonic acid activation	[c] : arachd + atp + coa --> amp + arachdcoa + ppi	Fatty acid activation	Cytosol	6.2.1.3	Irreversible
FACOAL226i	C226 fatty acid activation	[c] : atp + coa + crvnc --> amp + c226coa + ppi	Fatty acid activation	Cytosol	6.2.1.3	Irreversible
CATm	catalase	[m] : (2) h2o2 --> (2) h2o + o2	ROS Detoxification	Mitochondria	1.11.1.6	Irreversible
LDH_Lm	L-lactate dehydrogenase	[m] : lac-L + nad <==> h + nadh + pyr	Pyruvate Metabolism	Mitochondria	1.1.1.27	Reversible
H2CO3Dm	carboxylic acid dissociation	[m] : co2 + h2o <==> h2co3	Miscellaneous	Mitochondria	4.2.1.1	Reversible
PEPCKm	Phosphoenolpyruvate carboxykinase (GTP)	[m] : gtp + oaa --> co2 + gdp + pep	Glycolysis/Gluconeogenesis	Mitochondria	4.1.1.32	Irreversible
GLYKm	glycerol kinase	[m] : atp + glyc --> adp + glyc3p + h	Glycerophospholipid Metabolism	Mitochondria	2.7.1.30	Irreversible
HMGLm	hydroxymethylglutaryl-CoA lyase	[m] : hmgcoa --> acac + accoa	Cholesterol Metabolism	Mitochondria	4.1.3.4	Irreversible
PPCOACm	Propionyl-CoA carboxylase, mitochondrial	[m] : atp + hco3 + ppcoa --> adp + h + mmcoa-S + pi	Valine, Leucine, and Isoleucine Metabolism	Mitochondria	6.4.1.3	Irreversible
MMSAD1m	methylmalonate-semialdehyde dehydrogenase	[m] : 2mop + coa + nad --> co2 + nadh + ppcoa	Valine, Leucine, and Isoleucine Metabolism	Mitochondria	1.2.1.27	Irreversible
CK	ATP Creatine kinase	[m] : atp + creat <==> adp + pcreat	Urea cycle/amino group metabolism	Mitochondria	2.7.3.2	Reversible
TMDK1m	thymidine kinase (ATP:thymidine)	[m] : atp + thymd --> adp + dtmp + h	Nucleotides	Mitochondria	2.7.1.21	Irreversible
CYOR-u10m	ubiquinol-6 cytochrome c reductase, Complex III	(2) ficytC[m] + (2) h[m] + q10h2[m] --> (2) focytC[m] + (4) h[c] + q10[m]	Oxidative Phosphorylation	Cytosol, Mitochondria	1.10.2.2	Irreversible
ATPS4m	ATP synthase (four protons for one ATP)	adp[m] + (4) h[c] + pi[m] --> atp[m] + (3) h[m] + h2o[m]	Oxidative Phosphorylation	Cytosol, Mitochondria	3.6.3.14	Irreversible
DGNSKm	deoxyguanosine kinase	[m] : atp + dgsn --> adp + dgmp + h	Nucleotides	Mitochondria	2.7.1.113	Irreversible
DUTPDPm	dUTP diphosphatase	[m] : dutp + h2o --> dump + h + ppi	Nucleotides	Mitochondria	3.6.1.23	Irreversible
GTHRDt	Glutathione transport into mitochondria	atp[c] + gthrd[c] + h2o[c] <==> adp[c] + gthrd[m] + h[c] + pi[c]	Glutathione Metabolism	Cytosol, Mitochondria		Reversible
GTHOm	glutathione oxidoreductase	[m] : gthox + h + nadph --> (2) gthrd + nadp	Glutamate metabolism	Mitochondria	1.8.1.7	Irreversible
GTHPm	glutathione peroxidase, mitochondria	[m] : (2) gthrd + h2o2 <==> gthox + (2) h2o	Glutathione Metabolism	Mitochondria	1.11.1.9	Reversible
SPODMm	superoxide dismutase	[m] : (2) h + (2) o2s --> h2o2 + o2	ROS Detoxification	Mitochondria	1.15.1.1	Irreversible
CYOOm3	cytochrome c oxidase, mitochondrial Complex IV	(4) focytC[m] + (7.92) h[m] + o2[m] --> (4) ficytC[m] + (4) h[c] + (1.96) h2o[m] + (0.02) o2s[m]	Oxidative Phosphorylation	Cytosol, Mitochondria	1.9.3.1	Irreversible
OCOAT1m	3-oxoacid CoA-transferase	[m] : acac + succoa <==> aacoa + succ	Valine, Leucine, and Isoleucine Metabolism	Mitochondria	2.8.3.5	Reversible
OCBTm	ornithine carbamoyltransferase, irreversible	[m] : cbp + orn --> citr-L + h + pi	Urea cycle/amino group metabolism	Mitochondria	2.1.3.3	Irreversible
THYMDtm	thymd transport	thymd[c] <==> thymd[m]	Transport, Mitochondrial	Cytosol, Mitochondria		Reversible
GLYCtm	glycerol transport	glyc[c] <==> glyc[m]	Transport, Mitochondrial	Cytosol, Mitochondria		Reversible
FE2tm	iron (II) transport	fe2[c] + h[c] --> fe2[m] + h[m]	Transport, Mitochondrial	Cytosol, Mitochondria		Irreversible
GLYtm	glycine passive transport to mitochondria	gly[c] <==> gly[m]	Transport, Mitochondrial	Cytosol, Mitochondria		Reversible
PCm	pyruvate carboxylase	[m] : atp + hco3 + pyr --> adp + h + oaa + pi	Pyruvate Metabolism	Mitochondria	6.4.1.1	Irreversible
ORNt4m	ornithine mitochondrial transport exchange with citruline	citr-L[c] + h[c] + orn[m] <==> citr-L[m] + h[m] + orn[c]	Transport, Mitochondrial	Cytosol, Mitochondria		Reversible
CITRtm	citrulline mitochondrial transport via proton antiport	citr-L[m] <==> citr-L[c]	Transport, Mitochondrial	Cytosol, Mitochondria		Reversible
ARGtm	arginine mitochondrial transport via ornithine carrier	arg-L[c] + h[m] <==> arg-L[m] + h[c]	Transport, Mitochondrial	Cytosol, Mitochondria		Reversible
LYStm	Lysine mitochondrial transport via ornithine carrier	h[m] + lys-L[c] <==> h[c] + lys-L[m]	Transport, Mitochondrial	Cytosol, Mitochondria		Reversible
ASPGLUm	aspartate-glutamate mitochondrial shuttle	asp-L[m] + glu-L[c] + h[c] <==> asp-L[c] + glu-L[m] + h[m]	Transport, Mitochondrial	Cytosol, Mitochondria		Reversible
SUCCt2m	succinate transport, mitochondrial	pi[m] + succ[c] <==> pi[c] + succ[m]	Transport, Mitochondrial	Cytosol, Mitochondria		Reversible
THD1m	NAD(P) transhydrogenase	h[c] + nadh[m] + nadp[m] <==> h[m] + nad[m] + nadph[m]	NAD Metabolism	Cytosol, Mitochondria	1.6.1.1	Reversible
Htm	Uncoupling protein	h[c] --> h[m]	Transport, Mitochondrial	Cytosol, Mitochondria		Irreversible
BDHm	(R)-3-Hydroxybutanoate:NAD+ oxidoreductase	[m] : bhb + nad <==> acac + h + nadh	Butanoate Metabolism	Mitochondria	1.1.1.30	Reversible
BHBtm	(R)-3-Hydroxybutanoate mitochondrial transport via H+ symport	bhb[c] + h[c] <==> bhb[m] + h[m]	Transport, Mitochondrial	Cytosol, Mitochondria		Reversible
ACACt2m	Acetoacetate mitochondrial transport via H+ symport	acac[c] + h[c] <==> acac[m] + h[m]	Transport, Mitochondrial	Cytosol, Mitochondria		Reversible
ACALDtm	acetaldehyde mitochondrial diffusion	acald[m] <==> acald[c]	Transport, Mitochondrial	Cytosol, Mitochondria		Reversible
SBPP1er	sphingoid base-phosphate phosphatase (sphinganine 1-phosphatase), endoplasmic reticulum	[r] : h2o + sph1p --> pi + sphgn	Sphingolipid Metabolism	Endoplasmic Reticulum		Irreversible
BILIRED	Nad(p)h biliverdin reductase	[c] : biliverd + h + nadph --> bilirub + nadp	Heme Degradation	Cytosol	1.3.1.24	Irreversible
GFUCS	GDP-L-fucose synthase	[c] : gdpddman + h + nadph --> gdpfuc + nadp	Fructose and Mannose Metabolism	Cytosol	1.1.1.271	Irreversible
BACCL	biotin-[acetyl-CoA-carboxylase] ligase	[c] : atp + btn + h --> btamp + ppi	Biotin Metabolism	Cytosol	6.3.4.15	Irreversible
CYSO	cysteine oxidase	[c] : cys-L + o2 --> 3sala + (2) h	Taurine and hypotaurine metabolism	Cytosol	1.13.11.20	Irreversible
G6PPer	glucose-6-phosphate phosphatase, edoplasmic reticular	[r] : g6p + h2o --> glc-D + pi	Glycolysis/Gluconeogenesis	Endoplasmic Reticulum	3.1.3.9	Irreversible
FT	farnesyltranstransferase (trans,trans,cis-geranylgeranyl diphosphate-generating)	[c] : frdp + ipdp --> ppi + ttc-ggdp	N-Glycan Biosynthesis	Cytosol		Irreversible
GLYCK2	glycerate kinase	[c] : atp + glyc-R --> 2pg + adp + h	Glyoxylate and Dicarboxylate Metabolism	Cytosol	2.7.1.31	Irreversible
NNATr	nicotinate-nucleotide adenylyltransferase	[c] : atp + h + nicrnt <==> dnad + ppi	NAD Metabolism	Cytosol	2.7.7.18	Reversible
ITCOAL1m	Itaconate--CoA ligase (GDP-forming), mitochondrial	[m] : coa + gtp + itacon <==> gdp + itaccoa + pi	C5-Branched dibasic acid metabolism	Mitochondria	6.2.1.4	Reversible
H2CO3D2	carboxylic acid dissociation	[c] : h + hco3 <==> h2co3	Miscellaneous	Cytosol		Reversible
KAS8	b-ketoacyl synthetase (palmitate, n-C16:0)	[c] : accoa + (20) h + (7) malcoa + (14) nadph --> (7) co2 + (8) coa + (6) h2o + hdca + (14) nadp	Fatty acid elongation	Cytosol	2.3.1.41	Irreversible
HMGCOASi	Hydroxymethylglutaryl CoA synthase (ir)	[c] : aacoa + accoa + h2o --> coa + h + hmgcoa	Cholesterol Metabolism	Cytosol	4.1.3.5	Irreversible
ADKd	adenylate kinase (d form)	[c] : damp + datp <==> (2) dadp	Nucleotides	Cytosol	2.7.4.3	Reversible
ALKP	alkaline phosphatase	[c] : dhap + h2o --> dha + pi	Glycerophospholipid Metabolism	Cytosol	3.1.3.1	Irreversible
MTAP	5'-methylthioadenosine phosphorylase	[c] : 5mta + pi --> 5mdr1p + ade	Arginine and Proline Metabolism	Cytosol	2.4.2.28	Irreversible
ACYP	acylphosphatase	[c] : 13dpg + h2o --> 3pg + h + pi	Glycolysis/Gluconeogenesis	Cytosol	3.6.1.7	Irreversible
P5CRx	pyrroline-5-carboxylate reductase	[c] : 1pyr5c + (2) h + nadh --> nad + pro-L	Urea cycle/amino group metabolism	Cytosol	1.5.1.2	Irreversible
DOLK_L	Dolichol kinase, human (liver)	[c] : ctp + (0.1) dolichol_L --> cdp + (0.1) dolp_L + h	N-Glycan Biosynthesis	Cytosol	2.7.1.108	Irreversible
DOLICHOL_Lter	dolichol diffusion, human (liver)	(0.1) dolichol_L[r] <==> (0.1) dolichol_L[c]	N-Glycan Biosynthesis	Cytosol, Endoplasmic Reticulum		Reversible
DOLICHOL_Uter	dolichol diffusion, human (uterus)	(0.1) dolichol_U[r] <==> (0.1) dolichol_U[c]	N-Glycan Biosynthesis	Cytosol, Endoplasmic Reticulum		Reversible
DOLK_U	Dolichol kinase, human (uterus)	[c] : ctp + (0.1) dolichol_U --> cdp + (0.1) dolp_U + h	N-Glycan Biosynthesis	Cytosol	2.7.1.108	Irreversible
DOLPH_Ler	Dolichol-phosphate phosphohydrolase, human (liver)	[r] : (0.1) dolp_L + h2o --> (0.1) dolichol_L + pi	N-Glycan Biosynthesis	Endoplasmic Reticulum	3.1.3.51	Irreversible
DOLPH_Uer	Dolichol-phosphate phosphohydrolase, human (uterus)	[r] : (0.1) dolp_U + h2o --> (0.1) dolichol_U + pi	N-Glycan Biosynthesis	Endoplasmic Reticulum	3.1.3.51	Irreversible
DOLDPP_Ler	Dolichyl-diphosphate phosphohydrolase, human (liver)	[r] : (0.1) doldp_L + h2o --> (0.1) dolp_L + h + pi	N-Glycan Biosynthesis	Endoplasmic Reticulum	3.6.1.43	Irreversible
DOLDPP_Uer	Dolichyl-diphosphate phosphohydrolase, human (uterus)	[r] : (0.1) doldp_U + h2o --> (0.1) dolp_U + h + pi	N-Glycan Biosynthesis	Endoplasmic Reticulum	3.6.1.43	Irreversible
DOLGPP_Ler	Dolichyl-beta-D-glucosyl-phosphate dolichylphosphohydrolase (liver)	[r] : (0.1) dolglcp_L + h2o --> (0.1) dolp_L + glc-D + h	N-Glycan Biosynthesis	Endoplasmic Reticulum	3.1.4.48	Irreversible
DOLGPP_Uer	Dolichyl-beta-D-glucosyl-phosphate dolichylphosphohydrolase (uterus)	[r] : (0.1) dolglcp_U + h2o --> (0.1) dolp_U + glc-D + h	N-Glycan Biosynthesis	Endoplasmic Reticulum	3.1.4.48	Irreversible
UDPDOLPT_L	UDPglucose:dolichyl-phosphate beta-D-glucosyltransferase (liver)	[c] : (0.1) dolp_L + udpg --> (0.1) dolglcp_L + udp	N-Glycan Biosynthesis	Cytosol	2.4.1.117	Irreversible
UDPDOLPT_U	UDPglucose:dolichyl-phosphate beta-D-glucosyltransferase (uterus)	[c] : (0.1) dolp_U + udpg --> (0.1) dolglcp_U + udp	N-Glycan Biosynthesis	Cytosol	2.4.1.117	Irreversible
DOLP_Lter	dolichol phosphate flippase (liver)	(0.1) dolp_L[r] --> (0.1) dolp_L[c]	N-Glycan Biosynthesis	Cytosol, Endoplasmic Reticulum		Irreversible
DOLP_Uter	dolichol phosphate flippase (uterus)	(0.1) dolp_U[r] --> (0.1) dolp_U[c]	N-Glycan Biosynthesis	Cytosol, Endoplasmic Reticulum		Irreversible
DOLPMT_L	Dolichyl-phosphate D-mannosyltransferase (liver)	[c] : (0.1) dolp_L + gdpmann --> (0.1) dolmanp_L + gdp	N-Glycan Biosynthesis	Cytosol	2.4.1.83	Irreversible
DOLPMT_U	Dolichyl-phosphate D-mannosyltransferase (uterus)	[c] : (0.1) dolp_U + gdpmann --> (0.1) dolmanp_U + gdp	N-Glycan Biosynthesis	Cytosol	2.4.1.83	Irreversible
GLCNACPT_L	UDP-GlcNAc:dolichol-phosphate GlcNAc phosphotransferase (liver)	[c] : (0.1) dolp_L + uacgam --> (0.1) naglc2p_L + ump	N-Glycan Biosynthesis	Cytosol	2.7.8.15	Irreversible
GLCNACPT_U	UDP-GlcNAc:dolichol-phosphate GlcNAc phosphotransferase (uterus)	[c] : (0.1) dolp_U + uacgam --> (0.1) naglc2p_U + ump	N-Glycan Biosynthesis	Cytosol	2.7.8.15	Irreversible
GLCNACT_L	UDP-GlcNAc:N-acetyl-D-glucosaminyl diphosphodolichol N-acetyl-D-glucosaminyltransferase (liver)	[c] : (0.1) naglc2p_L + uacgam --> (0.1) chito2pdol_L + h + udp	N-Glycan Biosynthesis	Cytosol	2.4.1.141	Irreversible
GLCNACT_U	UDP-GlcNAc:N-acetyl-D-glucosaminyl diphosphodolichol N-acetyl-D-glucosaminyltransferase (uterus)	[c] : (0.1) naglc2p_U + uacgam --> (0.1) chito2pdol_U + h + udp	N-Glycan Biosynthesis	Cytosol	2.4.1.141	Irreversible
BDMT_L	GDPmannose:chitobiosyldiphosphodolichol beta-D-mannosyltransferase (liver)	[c] : (0.1) chito2pdol_L + gdpmann --> gdp + h + (0.1) mpdol_L	N-Glycan Biosynthesis	Cytosol	2.4.1.142	Irreversible
BDMT_U	GDPmannose:chitobiosyldiphosphodolichol beta-D-mannosyltransferase (uterus)	[c] : (0.1) chito2pdol_U + gdpmann --> gdp + h + (0.1) mpdol_U	N-Glycan Biosynthesis	Cytosol	2.4.1.142	Irreversible
G12MT1_L	Glycolipid 1,2-alpha-D-mannosyltransferase (liver)	[c] : gdpmann + (0.1) m2mpdol_L --> gdp + h + (0.1) m3mpdol_L	N-Glycan Biosynthesis	Cytosol	2.4.1.131	Irreversible
G12MT1_U	Glycolipid 1,2-alpha-D-mannosyltransferase (uterus)	[c] : gdpmann + (0.1) m2mpdol_U --> gdp + h + (0.1) m3mpdol_U	N-Glycan Biosynthesis	Cytosol	2.4.1.131	Irreversible
G12MT2_L	Glycolipid 1,2-alpha-D-mannosyltransferase (liver)	[c] : gdpmann + (0.1) m3mpdol_L --> gdp + h + (0.1) m4mpdol_L	N-Glycan Biosynthesis	Cytosol	2.4.1.131	Irreversible
G12MT2_U	Glycolipid 1,2-alpha-D-mannosyltransferase (uterus)	[c] : gdpmann + (0.1) m3mpdol_U --> gdp + h + (0.1) m4mpdol_U	N-Glycan Biosynthesis	Cytosol	2.4.1.131	Irreversible
G13MT_L	Glycolipid 1,3-alpha-D-mannosyltransferase (liver)	[c] : gdpmann + (0.1) mpdol_L --> gdp + h + (0.1) m1mpdol_L	N-Glycan Biosynthesis	Cytosol	2.4.1.132	Irreversible
G13MT_U	Glycolipid 1,3-alpha-D-mannosyltransferase (uterus)	[c] : gdpmann + (0.1) mpdol_U --> gdp + h + (0.1) m1mpdol_U	N-Glycan Biosynthesis	Cytosol	2.4.1.132	Irreversible
G16MT_L	Glycolipid 1,6-alpha-D-mannosyltransferase (liver)	[c] : gdpmann + (0.1) m1mpdol_L --> gdp + h + (0.1) m2mpdol_L	N-Glycan Biosynthesis	Cytosol		Irreversible
G16MT_U	Glycolipid 1,6-alpha-D-mannosyltransferase (uterus)	[c] : gdpmann + (0.1) m1mpdol_U --> gdp + h + (0.1) m2mpdol_U	N-Glycan Biosynthesis	Cytosol		Irreversible
DOLMANP_Lter	dolichol-phosphate mannose flippase (liver)	(0.1) dolmanp_L[c] --> (0.1) dolmanp_L[r]	N-Glycan Biosynthesis	Cytosol, Endoplasmic Reticulum		Irreversible
DOLMANP_Uter	dolichol-phosphate mannose flippase (uterus)	(0.1) dolmanp_U[c] --> (0.1) dolmanp_U[r]	N-Glycan Biosynthesis	Cytosol, Endoplasmic Reticulum		Irreversible
DOLGLCP_Lter	Dolichyl beta-D-glucosyl phosphate flippase (liver)	(0.1) dolglcp_L[c] --> (0.1) dolglcp_L[r]	N-Glycan Biosynthesis	Cytosol, Endoplasmic Reticulum		Irreversible
DOLGLCP_Uter	Dolichyl beta-D-glucosyl phosphate flippase (uterus)	(0.1) dolglcp_U[c] --> (0.1) dolglcp_U[r]	N-Glycan Biosynthesis	Cytosol, Endoplasmic Reticulum		Irreversible
HISDC	histidine decarboxylase	[c] : h + his-L --> co2 + hista	Histidine Metabolism	Cytosol	4.1.1.22	Irreversible
GGT_L	geranylgeranyltransferase (liver)	[c] : (17.6) ipdp + ttc-ggdp --> (0.1) dedoldp_L + (17.6) ppi	N-Glycan Biosynthesis	Cytosol		Irreversible
PNTEH	Hydrolase Class ( RXN R02973)	[c] : h2o + ptth --> cysam + pnto-R	CoA Catabolism	Cytosol		Irreversible
DEDOLP1_L	dehydrodolichol diphosphate phosphatase (liver)	[c] : (0.1) dedoldp_L + h2o --> (0.1) dedolp_L + h + pi	N-Glycan Biosynthesis	Cytosol		Irreversible
DEDOLP2_L	dehydrodolichol phosphate phosphatase (liver)	[c] : (0.1) dedolp_L + h2o --> (0.1) dedol_L + pi	N-Glycan Biosynthesis	Cytosol		Irreversible
DEDOLR_L	dehydrodolichol reductase (liver)	[c] : (0.1) dedol_L + h + nadph --> (0.1) dolichol_L + nadp	N-Glycan Biosynthesis	Cytosol		Irreversible
GGT_U	geranylgeranyltransferase (uterus)	[c] : (16.5) ipdp + ttc-ggdp --> (0.1) dedoldp_U + (16.5) ppi	N-Glycan Biosynthesis	Cytosol		Irreversible
DEDOLP1_U	dehydrodolichol diphosphate phosphatase (uterus)	[c] : (0.1) dedoldp_U + h2o --> (0.1) dedolp_U + h + pi	N-Glycan Biosynthesis	Cytosol		Irreversible
DEDOLP2_U	dehydrodolichol phosphate phosphatase (uterus)	[c] : (0.1) dedolp_U + h2o --> (0.1) dedol_U + pi	N-Glycan Biosynthesis	Cytosol		Irreversible
DEDOLR_U	dehydrodolichol reductase (uterus)	[c] : (0.1) dedol_U + h + nadph --> (0.1) dolichol_U + nadp	N-Glycan Biosynthesis	Cytosol		Irreversible
DOLASNT_Ler	Dolichyl-diphosphooligosaccharide:protein-L-asparagine oligopolysaccharidotransferase (liver)	[r] : Asn-X-Ser/Thr + (0.1) g3m8mpdol_L --> (0.1) doldp_L + g3m8masn + h	N-Glycan Biosynthesis	Endoplasmic Reticulum	2.4.1.119	Irreversible
DOLASNT_Uer	Dolichyl-diphosphooligosaccharide:protein-L-asparagine oligopolysaccharidotransferase (uterus)	[r] : Asn-X-Ser/Thr + (0.1) g3m8mpdol_U --> (0.1) doldp_U + g3m8masn + h	N-Glycan Biosynthesis	Endoplasmic Reticulum	2.4.1.119	Irreversible
MG1er	mannosyl-oligosaccharide glucosidase, endoplasmic reticulum	[r] : g3m8masn + h2o --> g2m8masn + glc-D	N-Glycan Biosynthesis	Endoplasmic Reticulum	3.2.1.106	Irreversible
MG2er	mannosyl-oligosaccharide glucosidase, endoplasmic reticulum	[r] : g2m8masn + h2o --> g1m8masn + glc-D	N-Glycan Biosynthesis	Endoplasmic Reticulum		Irreversible
MG3er	mannosyl-oligosaccharide glucosidase, endoplasmic reticulum	[r] : g1m8masn + h2o --> glc-D + m8masn	N-Glycan Biosynthesis	Endoplasmic Reticulum		Irreversible
DOLPMT4_Uer	dolichyl-phosphate-mannose-glycolipid alpha-mannosyltransferase (uterus)	[r] : (0.1) dolmanp_U + (0.1) m7mpdol_U --> (0.1) dolp_U + h + (0.1) m8mpdol_U	N-Glycan Biosynthesis	Endoplasmic Reticulum	2.4.1.130	Irreversible
DOLPMT4_Ler	dolichyl-phosphate-mannose-glycolipid alpha-mannosyltransferase (liver)	[r] : (0.1) dolmanp_L + (0.1) m7mpdol_L --> (0.1) dolp_L + h + (0.1) m8mpdol_L	N-Glycan Biosynthesis	Endoplasmic Reticulum	2.4.1.130	Irreversible
DOLPMT3_Uer	dolichyl-phosphate-mannose-glycolipid alpha-mannosyltransferase (uterus)	[r] : (0.1) dolmanp_U + (0.1) m6mpdol_U --> (0.1) dolp_U + h + (0.1) m7mpdol_U	N-Glycan Biosynthesis	Endoplasmic Reticulum	2.4.1.130	Irreversible
DOLPMT3_Ler	dolichyl-phosphate-mannose-glycolipid alpha-mannosyltransferase (liver)	[r] : (0.1) dolmanp_L + (0.1) m6mpdol_L --> (0.1) dolp_L + h + (0.1) m7mpdol_L	N-Glycan Biosynthesis	Endoplasmic Reticulum	2.4.1.130	Irreversible
DOLPMT2_Uer	dolichyl-phosphate-mannose-glycolipid alpha-mannosyltransferase (uterus)	[r] : (0.1) dolmanp_U + (0.1) m5mpdol_U --> (0.1) dolp_U + h + (0.1) m6mpdol_U	N-Glycan Biosynthesis	Endoplasmic Reticulum	2.4.1.130	Irreversible
DOLPMT2_Ler	dolichyl-phosphate-mannose-glycolipid alpha-mannosyltransferase (liver)	[r] : (0.1) dolmanp_L + (0.1) m5mpdol_L --> (0.1) dolp_L + h + (0.1) m6mpdol_L	N-Glycan Biosynthesis	Endoplasmic Reticulum	2.4.1.130	Irreversible
DOLPMT1_Uer	dolichyl-phosphate-mannose-glycolipid alpha-mannosyltransferase (uterus)	[r] : (0.1) dolmanp_U + (0.1) m4mpdol_U --> (0.1) dolp_U + h + (0.1) m5mpdol_U	N-Glycan Biosynthesis	Endoplasmic Reticulum	2.4.1.130	Irreversible
DOLPMT1_Ler	dolichyl-phosphate-mannose-glycolipid alpha-mannosyltransferase (liver)	[r] : (0.1) dolmanp_L + (0.1) m4mpdol_L --> (0.1) dolp_L + h + (0.1) m5mpdol_L	N-Glycan Biosynthesis	Endoplasmic Reticulum	2.4.1.130	Irreversible
DOLPGT3_Uer	dolichyl-phosphate-glucose-glycolipid alpha-glucosyltransferase (uterus)	[r] : (0.1) dolglcp_U + (0.1) g2m8mpdol_U --> (0.1) dolp_U + (0.1) g3m8mpdol_U + h	N-Glycan Biosynthesis	Endoplasmic Reticulum		Irreversible
DOLPGT3_Ler	dolichyl-phosphate-glucose-glycolipid alpha-glucosyltransferase (liver)	[r] : (0.1) dolglcp_L + (0.1) g2m8mpdol_L --> (0.1) dolp_L + (0.1) g3m8mpdol_L + h	N-Glycan Biosynthesis	Endoplasmic Reticulum		Irreversible
DOLPGT2_Uer	dolichyl-phosphate-glucose-glycolipid alpha-glucosyltransferase (uterus)	[r] : (0.1) dolglcp_U + (0.1) g1m8mpdol_U --> (0.1) dolp_U + (0.1) g2m8mpdol_U + h	N-Glycan Biosynthesis	Endoplasmic Reticulum		Irreversible
DOLPGT2_Ler	dolichyl-phosphate-glucose-glycolipid alpha-glucosyltransferase (liver)	[r] : (0.1) dolglcp_L + (0.1) g1m8mpdol_L --> (0.1) dolp_L + (0.1) g2m8mpdol_L + h	N-Glycan Biosynthesis	Endoplasmic Reticulum		Irreversible
DOLPGT1_Uer	dolichyl-phosphate-glucose-glycolipid alpha-glucosyltransferase (uterus)	[r] : (0.1) dolglcp_U + (0.1) m8mpdol_U --> (0.1) dolp_U + (0.1) g1m8mpdol_U + h	N-Glycan Biosynthesis	Endoplasmic Reticulum		Irreversible
DOLPGT1_Ler	dolichyl-phosphate-glucose-glycolipid alpha-glucosyltransferase (liver)	[r] : (0.1) dolglcp_L + (0.1) m8mpdol_L --> (0.1) dolp_L + (0.1) g1m8mpdol_L + h	N-Glycan Biosynthesis	Endoplasmic Reticulum		Irreversible
MM8Ber	mannosyl-oligosaccharide 1,2-alpha-mannosidase, endoplasmic reticulum	[r] : h2o + m8masn --> m7masnB + man	N-Glycan Biosynthesis	Endoplasmic Reticulum	3.2.1.113	Irreversible
MM8Ag	mannosyl-oligosaccharide 1,2-alpha-mannosidase, Golgi apparatus	[g] : h2o + m8masn --> m7masnA + man	N-Glycan Biosynthesis	Golgi Apparatus	3.2.1.113	Irreversible
MM8Cg	mannosyl-oligosaccharide 1,2-alpha-mannosidase, Golgi apparatus	[g] : h2o + m8masn --> m7masnC + man	N-Glycan Biosynthesis	Golgi Apparatus	3.2.1.113	Irreversible
MM7B1g	mannosyl-oligosaccharide 1,2-alpha-mannosidase, Golgi apparatus	[g] : h2o + m7masnB --> m6masnB1 + man	N-Glycan Biosynthesis	Golgi Apparatus	3.2.1.113	Irreversible
MM7B2g	mannosyl-oligosaccharide 1,2-alpha-mannosidase, Golgi apparatus	[g] : h2o + m7masnB --> m6masnB2 + man	N-Glycan Biosynthesis	Golgi Apparatus	3.2.1.113	Irreversible
MM6B1ag	mannosyl-oligosaccharide 1,2-alpha-mannosidase, Golgi apparatus	[g] : h2o + m6masnB1 --> m5masnB1 + man	N-Glycan Biosynthesis	Golgi Apparatus	3.2.1.113	Irreversible
MM6B1bg	mannosyl-oligosaccharide 1,2-alpha-mannosidase, Golgi apparatus	[g] : h2o + m6masnB2 --> m5masnB1 + man	N-Glycan Biosynthesis	Golgi Apparatus	3.2.1.113	Irreversible
MM6B2g	mannosyl-oligosaccharide 1,2-alpha-mannosidase, Golgi apparatus	[g] : h2o + m6masnB2 --> m5masnB2 + man	N-Glycan Biosynthesis	Golgi Apparatus	3.2.1.113	Irreversible
MM5bg	mannosyl-oligosaccharide 1,2-alpha-mannosidase, Golgi apparatus	[g] : h2o + m5masnB1 --> m4masn + man	N-Glycan Biosynthesis	Golgi Apparatus	3.2.1.113	Irreversible
MM5cg	mannosyl-oligosaccharide 1,2-alpha-mannosidase, Golgi apparatus	[g] : h2o + m5masnB2 --> m4masn + man	N-Glycan Biosynthesis	Golgi Apparatus	3.2.1.113	Irreversible
MM7Cbg	mannosyl-oligosaccharide 1,2-alpha-mannosidase, Golgi apparatus	[g] : h2o + m7masnC --> m6masnC + man	N-Glycan Biosynthesis	Golgi Apparatus	3.2.1.113	Irreversible
MM7Cag	mannosyl-oligosaccharide 1,2-alpha-mannosidase, Golgi apparatus	[g] : h2o + m7masnA --> m6masnC + man	N-Glycan Biosynthesis	Golgi Apparatus	3.2.1.113	Irreversible
MM7Ag	mannosyl-oligosaccharide 1,2-alpha-mannosidase, Golgi apparatus	[g] : h2o + m7masnA --> m6masnA + man	N-Glycan Biosynthesis	Golgi Apparatus	3.2.1.113	Irreversible
MM6ag	mannosyl-oligosaccharide 1,2-alpha-mannosidase, Golgi apparatus	[g] : h2o + m6masnA --> m5masnC + man	N-Glycan Biosynthesis	Golgi Apparatus	3.2.1.113	Irreversible
MM6bg	mannosyl-oligosaccharide 1,2-alpha-mannosidase, Golgi apparatus	[g] : h2o + m6masnC --> m5masnC + man	N-Glycan Biosynthesis	Golgi Apparatus	3.2.1.113	Irreversible
MM5ag	mannosyl-oligosaccharide 1,2-alpha-mannosidase, Golgi apparatus	[g] : h2o + m5masnC --> m4masn + man	N-Glycan Biosynthesis	Golgi Apparatus	3.2.1.113	Irreversible
M13N2Tg	alpha-1,3-mannosyl-glycoprotein 2-beta-N-acetylglucosaminyltransferase	[g] : m4masn + uacgam --> h + nm4masn + udp	N-Glycan Biosynthesis	Golgi Apparatus	2.4.1.101	Irreversible
M7MASNBterg	m7masnB transport from endoplasmic reticulum to Golgi apparatus	m7masnB[r] --> m7masnB[g]	N-Glycan Biosynthesis	Endoplasmic Reticulum, Golgi Apparatus		Irreversible
G1M8MASNterg	g1m8masn transport from endoplasmic reticulum to Golgi apparatus	g1m8masn[r] --> g1m8masn[g]	N-Glycan Biosynthesis	Endoplasmic Reticulum, Golgi Apparatus		Irreversible
M1316Mg	mannosyl-oligosaccharide 1,3-1,6-alpha-mannosidase	[g] : (2) h2o + nm4masn --> (2) man + nm2masn	N-Glycan Biosynthesis	Golgi Apparatus	3.2.1.114	Irreversible
M16NTg	alpha-1,6-mannosyl-glycoprotein 2-beta-N-acetylglucosaminyltransferase	[g] : nm2masn + uacgam --> h + n2m2masn + udp	N-Glycan Biosynthesis	Golgi Apparatus	2.4.1.143	Irreversible
F6Tg	glycoprotein 6-alpha-L-fucosyltransferase	[g] : gdpfuc + n2m2masn --> fn2m2masn + gdp + h	N-Glycan Biosynthesis	Golgi Apparatus	2.4.1.68	Irreversible
G14Tg	beta-N-acetylglucosaminylglycopeptide beta-1,4-galactosyltransferase	[g] : fn2m2masn + (2) udpgal --> (2) h + l2fn2m2masn + (2) udp	N-Glycan Biosynthesis	Golgi Apparatus	2.4.1.38	Irreversible
S26Tg	beta-galactoside alpha-2,6-sialyltransferase	[g] : (2) cmpacna + l2fn2m2masn --> (2) cmp + (2) h + s2l2fn2m2masn	N-Glycan Biosynthesis	Golgi Apparatus	2.4.99.1	Irreversible
M14NTg	beta-1,4-mannosyl-glycoprotein 4-beta-N-acetylglucosaminyltransferase	[g] : n2m2masn + uacgam --> h + n2m2nmasn + udp	N-Glycan Biosynthesis	Golgi Apparatus	2.4.1.144	Irreversible
M13N4Tg	alpha-1,3-mannosyl-glycoprotein 4-beta-N-acetylglucosaminyltransferase	[g] : n2m2masn + uacgam --> h + n3m2masn + udp	N-Glycan Biosynthesis	Golgi Apparatus	2.4.1.145	Irreversible
M16N6Tg	alpha-1,6-mannosyl-glycoprotein 6-beta-N-acetylglucosaminyltransferase	[g] : n3m2masn + uacgam --> h + n4m2masn + udp	N-Glycan Biosynthesis	Golgi Apparatus	2.4.1.155	Irreversible
M16N4Tg	alpha-1,6-mannosyl-glycoprotein 4-beta-N-acetylglucosaminyltransferase	[g] : n4m2masn + uacgam --> h + n5m2masn + udp	N-Glycan Biosynthesis	Golgi Apparatus	2.4.1.201	Irreversible
GTPCI	GTP cyclohydrolase I	[c] : gtp + h2o --> ahdt + for + h	Tetrahydrobiopterin	Cytosol	3.5.4.16	Irreversible
PTHPS	6-pyruvoyltetrahydropterin synthase	[c] : ahdt --> 6pthp + pppi	Tetrahydrobiopterin	Cytosol	4.2.3.12	Irreversible
METS	methionine synthase	[c] : 5mthf + hcys-L --> h + met-L + thf	Methionine Metabolism	Cytosol	2.1.1.13	Irreversible
MTHFC	methenyltetrahydrofolate cyclohydrolase	[c] : h2o + methf <==> 10fthf + h	Folate Metabolism	Cytosol	3.5.4.9	Reversible
MTHFCm	methenyltetrahydrifikate cyclohydrolase, mitochondrial	[m] : h2o + methf <==> 10fthf + h	Folate Metabolism	Mitochondria	3.5.4.9	Reversible
MTHFD	methylenetetrahydrofolate dehydrogenase (NADP)	[c] : mlthf + nadp <==> methf + nadph	Folate Metabolism	Cytosol	1.5.1.5	Reversible
MTHFDm	methylenetetrahydrofolate dehydrogenase (NADP), mitochondrial	[m] : mlthf + nadp <==> methf + nadph	Folate Metabolism	Mitochondria	1.5.1.5	Reversible
MTHFR3	5,10-methylenetetrahydrofolatereductase (NADPH)	[c] : (2) h + mlthf + nadph --> 5mthf + nadp	Folate Metabolism	Cytosol	1.5.1.20	Irreversible
IZPN	imidazolonepropionase	[c] : 4izp + h2o --> forglu + h	Histidine Metabolism	Cytosol	3.5.2.7	Irreversible
ACS2	acetyl-CoA synthase (propionate)	[c] : atp + coa + ppa --> amp + ppcoa + ppi	Propanoate Metabolism	Cytosol	6.2.1.1	Irreversible
M4MPDOL_Lter	m4mpdol flippase	m4mpdol_L[c] --> m4mpdol_L[r]	N-Glycan Biosynthesis	Cytosol, Endoplasmic Reticulum		Irreversible
M4MPDOL_Uter	m4mpdol flippase	m4mpdol_U[c] --> m4mpdol_U[r]	N-Glycan Biosynthesis	Cytosol, Endoplasmic Reticulum		Irreversible
M8MASNterg	m8masn transport from ER to Golgi apparatus	m8masn[r] --> m8masn[g]	N-Glycan Biosynthesis	Endoplasmic Reticulum, Golgi Apparatus		Irreversible
G2M8MASNterg	g2m8masn transport from endoplasmic reticulum to Golgi apparatus	g2m8masn[r] --> g2m8masn[g]	N-Glycan Biosynthesis	Endoplasmic Reticulum, Golgi Apparatus		Irreversible
G3M8MASNterg	g3m8masn transport from endoplasmic reticulum to Golgi apparatus	g3m8masn[r] --> g3m8masn[g]	N-Glycan Biosynthesis	Endoplasmic Reticulum, Golgi Apparatus		Irreversible
ENMAN3g	Endomannosidase (glc3man-producing), Golgi apparatus	[g] : g3m8masn + h2o --> glc3man + m7masnA	N-Glycan Biosynthesis	Golgi Apparatus		Irreversible
ENMAN2g	Endomannosidase (glc2man-producing), Golgi apparatus	[g] : g2m8masn + h2o --> glc2man + m7masnA	N-Glycan Biosynthesis	Golgi Apparatus		Irreversible
ENMAN1g	Endomannosidase (glc1man-producing), Golgi apparatus	[g] : g1m8masn + h2o --> glc1man + m7masnA	N-Glycan Biosynthesis	Golgi Apparatus		Irreversible
MAN1_7Ber	mannosidase I, endoplasmic reticulum (g1m7masnB-producing)	[r] : g1m8masn + h2o --> g1m7masnB + man	N-Glycan Biosynthesis	Endoplasmic Reticulum		Irreversible
MAN2_7Cer	mannosidase II, endoplasmic reticulum (g1m7masnC-producing)	[r] : g1m8masn + h2o --> g1m7masnC + man	N-Glycan Biosynthesis	Endoplasmic Reticulum		Irreversible
MAN1_6B1er	mannosidase I, endoplasmic reticulum (g1m6masnB1-producing)	[r] : g1m7masnC + h2o --> g1m6masnB1 + man	N-Glycan Biosynthesis	Endoplasmic Reticulum		Irreversible
MAN2_6B1er	mannosidase II, endoplasmic reticulum (g1m6masnB1-producing)	[r] : g1m7masnB + h2o --> g1m6masnB1 + man	N-Glycan Biosynthesis	Endoplasmic Reticulum		Irreversible
G1M7MASNCterg	g1m7masnC endoplasmic reticulum to Golgi transport	g1m7masnC[r] --> g1m7masnC[g]	N-Glycan Biosynthesis	Endoplasmic Reticulum, Golgi Apparatus		Irreversible
G1M7MASNBterg	g1m7masnC endoplasmic reticulum to Golgi transport	g1m7masnB[r] --> g1m7masnB[g]	N-Glycan Biosynthesis	Endoplasmic Reticulum, Golgi Apparatus		Irreversible
ENMAN4g	Endomannosidase (m6masnC-producing), Golgi apparatus	[g] : g1m7masnC + h2o --> glc1man + m6masnC	N-Glycan Biosynthesis	Golgi Apparatus		Irreversible
ENMAN5g	Endomannosidase (m6masnB2-producing), Golgi apparatus	[g] : g1m7masnB + h2o --> glc1man + m6masnB2	N-Glycan Biosynthesis	Golgi Apparatus		Irreversible
ENMAN6g	Endomannosidase (m5masnB1-producing), Golgi apparatus	[g] : g1m6masnB1 + h2o --> glc1man + m5masnB1	N-Glycan Biosynthesis	Golgi Apparatus		Irreversible
FACOAL80i	fatty-acid--CoA ligase (octanoate)	[c] : atp + coa + octa --> amp + occoa + ppi	Fatty acid activation	Cytosol	6.2.1.2	Irreversible
FACOAL140i	fatty-acid--CoA ligase (tetradecanoate)	[c] : atp + coa + ttdca --> amp + ppi + tdcoa	Fatty acid activation	Cytosol	6.2.1.3	Irreversible
G1M6MASNB1terg	g1m6masnB1 endoplasmic reticulum to Golgi transport	g1m6masnB1[r] --> g1m6masnB1[g]	N-Glycan Biosynthesis	Endoplasmic Reticulum, Golgi Apparatus		Irreversible
FAOXC80	Beta oxidation of med/long chain fatty acid	[m] : (3) coa + (3) fad + (3) h2o + (3) nad + occoa --> (4) accoa + (3) fadh2 + (3) h + (3) nadh	Fatty acid oxidation	Mitochondria	1.3.99.3	Irreversible
OCCOAtm	Octanoyl-CoA transport, diffusion	occoa[c] --> occoa[m]	Transport, Mitochondrial	Cytosol, Mitochondria		Irreversible
FUMtm	fumarate transport, mitochondrial	fum[c] + pi[m] <==> fum[m] + pi[c]	Transport, Mitochondrial	Cytosol, Mitochondria		Reversible
MMEm	methylmalonyl-CoA epimerase/racemase	[m] : mmcoa-R <==> mmcoa-S	Valine, Leucine, and Isoleucine Metabolism	Mitochondria	5.1.99.1	Reversible
ACCOACm	Acetyl-Coa carboxylase, beta isoform	[m] : accoa + atp + hco3 --> adp + h + malcoa + pi	Fatty Acid Metabolism	Mitochondria	6.4.1.2	Irreversible
MCDm	Malonyl-CoA Decarboxylase, mitochondrial	[m] : h + malcoa --> accoa + co2	Fatty Acid Metabolism	Mitochondria	4.1.1.9	Irreversible
CSNATm	carnitine O-aceyltransferase, mitochondrial	[m] : acrn + coa <==> accoa + crn	Fatty Acid Metabolism	Mitochondria	2.3.1.7	Reversible
ACCOALm	acetate-CoA ligase (AMP-forming)	[m] : atp + coa + ppa --> amp + ppcoa + ppi	Propanoate Metabolism	Mitochondria	6.2.1.17	Irreversible
PPAtm	Propionate transport, diffusion	ppa[c] --> ppa[m]	Transport, Mitochondrial	Cytosol, Mitochondria		Irreversible
CSNAT2m	carnitine O-aceyltransferase, mitochondrial	[m] : coa + pcrn <==> crn + ppcoa	Carnitine shuttle	Mitochondria	2.3.1.7	Reversible
ENGASE	endo-beta-N-acetylglucosaminidase	[c] : h2o + s2l2n2m2m --> acgam + s2l2n2m2mn	N-Glycan Degradation	Cytosol	3.2.1.96	Irreversible
SIAASE	sialidase	[c] : (2) h2o + s2l2n2m2mn --> (2) acnam + l2n2m2mn	N-Glycan Degradation	Cytosol	3.2.1.18	Irreversible
A_MANASE	alpha-mannosidase	[c] : (2) h2o + m2mn --> (2) man + mn	N-Glycan Degradation	Cytosol	3.2.1.24	Irreversible
ENGASE2	endo-beta-N-acetylglucosaminidase	[c] : h2o + n2m2nm --> acgam + n2m2nmn	N-Glycan Degradation	Cytosol	3.2.1.96	Irreversible
PHEMEtm	Heme transport to cytosol	pheme[m] <==> pheme[c]	Transport, Mitochondrial	Cytosol, Mitochondria		Reversible
A_MANASEly	alpha-mannosidase, lysosomal	[l] : (2) h2o + m2mn --> (2) man + mn	N-Glycan Degradation	Lysosome	3.2.1.24	Irreversible
AHEXASE2ly	beta-N-acetylhexosaminidase, lysosomal	[l] : (3) h2o + n2m2nmn --> (3) acgam + m2mn	N-Glycan Degradation	Lysosome	3.2.1.52	Irreversible
AHEXASEly	beta-N-acetylhexosaminidase, lysosomal	[l] : (2) h2o + n2m2mn --> (2) acgam + m2mn	N-Glycan Degradation	Lysosome	3.2.1.52	Irreversible
B_MANNASEly	beta-mannosidase, lysosomal	[l] : h2o + mn --> acgam + man	N-Glycan Degradation	Lysosome	3.2.1.25	Irreversible
ENGASE2ly	endo-beta-N-acetylglucosaminidase, lysosomal	[l] : h2o + n2m2nm --> acgam + n2m2nmn	N-Glycan Degradation	Lysosome	3.2.1.96	Irreversible
ENGASEly	endo-beta-N-acetylglucosaminidase, lysosomal	[l] : h2o + s2l2n2m2m --> acgam + s2l2n2m2mn	N-Glycan Degradation	Lysosome	3.2.1.96	Irreversible
FUCASEly	alpha-fucosidase, lysosomal	[l] : h2o + s2l2fn2m2masn --> fuc-L + s2l2n2m2masn	N-Glycan Degradation	Lysosome	3.2.1.51	Irreversible
GALASE1ly	beta-galactosidase, lysosomal	[l] : (2) h2o + l2n2m2mn --> (2) gal + n2m2mn	N-Glycan Degradation	Lysosome	3.2.1.23	Irreversible
GASNASE2ly	glycosylasparaginase, lysosomal	[l] : h2o + n2m2nmasn --> Asn-X-Ser/Thr + n2m2nm	N-Glycan Degradation	Lysosome	3.5.1.26	Irreversible
GASNASEly	glycosylasparaginase, lysosomal	[l] : h2o + s2l2n2m2masn --> Asn-X-Ser/Thr + s2l2n2m2m	N-Glycan Degradation	Lysosome	3.5.1.26	Irreversible
SIAASEly	sialidase, lysosomal	[l] : (2) h2o + s2l2n2m2mn --> (2) acnam + l2n2m2mn	N-Glycan Degradation	Lysosome	3.2.1.18	Irreversible
SLDx	L-sulfolactate dehydrogenase (NAD+)	[c] : nad + sl-L <==> 3spyr + h + nadh	Cysteine Metabolism	Cytosol	1.1.1.272	Reversible
GALNTg	GalNAc transferase, Golgi apparatus	[g] : Ser/Thr + udpacgal --> Tn_antigen + h + udp	O-Glycan Biosynthesis	Golgi Apparatus	2.4.1.41	Irreversible
NS26Tg	alpha-N-acetylgalactosaminide alpha-2,6-sialyltransferase	[g] : Tn_antigen + cmpacna --> cmp + h + sTn_antigen	O-Glycan Biosynthesis	Golgi Apparatus	2.4.99.3	Irreversible
N3Tg	N-acetylgalactosamine 3-beta-galactosyltransferase, Golgi apparatus	[g] : Tn_antigen + udpgal --> T_antigen + h + udp	O-Glycan Biosynthesis	Golgi Apparatus	2.4.1.122	Irreversible
CORE2GTg	Core 2 acetylglucosaminyltransferase, Golgi apparatus	[g] : T_antigen + uacgam --> core2 + h + udp	O-Glycan Biosynthesis	Golgi Apparatus	2.4.1.102	Irreversible
S23Tg	beta-galactoside alpha-2,3-sialyltransferase (T antigen)	[g] : T_antigen + cmpacna --> cmp + h + sT_antigen	O-Glycan Biosynthesis	Golgi Apparatus	2.4.99.4	Irreversible
NS26T2g	alpha-N-acetylgalactosaminide alpha-2,6-sialyltransferase	[g] : cmpacna + sT_antigen --> cmp + dsT_antigen + h	O-Glycan Biosynthesis	Golgi Apparatus	2.4.99.3	Irreversible
CORE3GTg	Core 3 beta-GlcNAc-transferase, Golgi apparatus	[g] : Tn_antigen + uacgam --> core3 + h + udp	O-Glycan Biosynthesis	Golgi Apparatus	2.4.1.147	Irreversible
CORE4GTg	Core 4 beta6-GalNAc-transferase, Golgi apparatus	[g] : core3 + uacgam --> core4 + h + udp	O-Glycan Biosynthesis	Golgi Apparatus	2.4.1.148	Irreversible
CORE6GTg	Core 6 beta-GlcNAc-transferase A, Golgi apparatus	[g] : Tn_antigen + uacgam --> core6 + h + udp	O-Glycan Biosynthesis	Golgi Apparatus	2.4.1.102	Irreversible
CORE5GTg	Core 5 alpha-GalNAc-transferase, Golgi apparatus	[g] : Tn_antigen + udpacgal --> core5 + h + udp	O-Glycan Biosynthesis	Golgi Apparatus		Irreversible
CORE7GTg	Core 7 alpha-GalNAc-transferase, Golgi apparatus	[g] : Tn_antigen + udpacgal --> core7 + h + udp	O-Glycan Biosynthesis	Golgi Apparatus		Irreversible
CORE8GTg	N-acetylgalactosamine 3-alpha-galactosyltransferase, Golgi apparatus	[g] : Tn_antigen + udpgal --> core8 + h + udp	O-Glycan Biosynthesis	Golgi Apparatus		Irreversible
N4Tg	N-acetylgalactosamine 4-beta-galactosyltransferase, Golgi apparatus	[g] : core6 + udpgal --> f1a + h + udp	O-Glycan Biosynthesis	Golgi Apparatus		Irreversible
A4GNT2g	alpha 1,4-N-acetylglucosaminyltransferase, Golgi apparatus	[g] : core2 + uacgam --> gncore2 + h + udp	O-Glycan Biosynthesis	Golgi Apparatus		Irreversible
A4GNT1g	alpha 1,4-N-acetylglucosaminyltransferase, Golgi apparatus	[g] : T_antigen + uacgam --> gncore1 + h + udp	O-Glycan Biosynthesis	Golgi Apparatus		Irreversible
FOLR2	folate reductase	[c] : fol + nadph --> dhf + nadp	Folate Metabolism	Cytosol	1.5.1.3	Irreversible
IMACTD	Imidazole acetaldeyde dehydrogenase	[c] : h2o + im4act + nad --> (2) h + im4ac + nadh	Histidine Metabolism	Cytosol	1.2.1.3	Irreversible
IMACTD_m	Imidazole acetaldeyde dehydrogenase (mito)	[m] : h2o + im4act + nad --> (2) h + im4ac + nadh	Histidine Metabolism	Mitochondria	1.2.1.3	Irreversible
NACASPAH	N-Acetyl-L-aspartate amidohydrolase	[c] : Nacasp + h2o --> ac + asp-L	Alanine and Aspartate Metabolism	Cytosol	3.5.1.15	Irreversible
SAMHISTA	S-Adenosyl-L-methionine:histamine N-tele-methyltransferase	[c] : amet + hista --> ahcys + h + mhista	Histidine Metabolism	Cytosol	2.1.1.8	Irreversible
MHISOR	N-Methylhistamine:oxygen oxidoreductase (deaminating)	[c] : h2o + mhista + o2 --> 3mldz + h2o2 + nh4	Histidine Metabolism	Cytosol	1.4.3.4	Irreversible
MACOXO	3-Methylimidazole acetaldehyde:NAD+ oxidoreductase	[c] : 3mldz + h2o + nad --> 3mlda + (2) h + nadh	Histidine Metabolism	Cytosol	1.2.1.5	Irreversible
GLUDxm	glutamate dehydrogenase (NAD) (mitochondrial)	[m] : glu-L + h2o + nad <==> akg + h + nadh + nh4	Glutamate metabolism	Mitochondria	1.4.1.2	Reversible
GLUDym	glutamate dehydrogenase (NADP), mitochondrial	[m] : glu-L + h2o + nadp <==> akg + h + nadph + nh4	Glutamate metabolism	Mitochondria	1.4.1.4	Reversible
GluForTx	Glutamate formimidoyltransferase	[c] : forglu + h + thf --> 5forthf + glu-L	Histidine Metabolism	Cytosol	2.1.2.5	Irreversible
GLUNm	glutaminase (mitochondrial)	[m] : gln-L + h2o --> glu-L + nh4	Glutamate metabolism	Mitochondria	3.5.1.2	Irreversible
ABTArm	4-aminobutyrate transaminase, reversible (mitochondrial)	[m] : 4abut + akg <==> glu-L + sucsal	Glutamate metabolism	Mitochondria	2.6.1.19	Reversible
ACGAMK	N-acetylglucosamine kinase	[c] : acgam + atp --> acgam6p + adp + h	Aminosugar Metabolism	Cytosol	2.7.1.59	Irreversible
CBPSam	carbamoyl-phosphate synthase (ammonia) (mitochondria	[m] : (2) atp + hco3 + nh4 --> (2) adp + cbp + (2) h + pi	Glutamate metabolism	Mitochondria	6.3.4.16	Irreversible
ASNNm	L-asparaginase (mitochondrial)	[m] : asn-L + h2o --> asp-L + nh4	Alanine and Aspartate Metabolism	Mitochondria	3.5.1.1	Irreversible
TYRASE	Tyrosinase	[c] : 56dihindlcrbxlt --> melanin	Tyrosine metabolism	Cytosol	2018-01-14	Irreversible
3HLYTCL	3-Hydroxy-L-tyrosine carboxy-lyase	[c] : 34dhphe + h --> co2 + dopa	Tyrosine metabolism	Cytosol	4.1.1.28	Irreversible
MAOLNOR	monoamine oxidase (L-Normetanephrine)	[c] : h2o + normete-L + o2 --> 3m4hpga + h2o2 + nh4	Tyrosine metabolism	Cytosol	1.4.3.4	Irreversible
41R1H2MAE12BOOX	4-[(1R)-1-Hydroxy-2-(methylamino)ethyl]-1,2-benzenediol:oxygen oxidoreductase(deaminating)(flavin-containing)	[c] : adrnl + h2o + o2 --> 34dhmald + h2o2 + mma	Tyrosine metabolism	Cytosol	1.4.3.4	Irreversible
ASPCTr	aspartate carbamoyltransferase (reversible)	[c] : asp-L + cbp <==> cbasp + h + pi	Pyrimidine Biosynthesis	Cytosol	2.1.3.2	Reversible
CSNATer	carnitine O-acetyltransferase, endolasmic reticulum	[r] : accoa + crn <==> acrn + coa	Fatty Acid Metabolism	Endoplasmic Reticulum	2.3.1.7	Reversible
42A12BOOX	4-(2-Aminoethyl)-1,2-benzenediol:oxygen oxidoreductase(deaminating)(flavin-containing)	[c] : dopa + h2o + o2 --> 34dhpac + h2o2 + nh4	Tyrosine metabolism	Cytosol	1.4.3.6	Irreversible
3M4HDXPAC	3-Methoxy-4-hydroxyphenylacetaldehyde:NAD+ oxidoreductase	[c] : 3mox4hpac + h2o + nad <==> (2) h + homoval + nadh	Tyrosine metabolism	Cytosol	1.2.1.5	Reversible
34DHPLACOX(NADP)	3,4-Dihydroxyphenylacetaldehyde:NADP+ oxidoreductase	[c] : 34dhpac + h2o + nadp <==> 34dhpha + (2) h + nadph	Tyrosine metabolism	Cytosol	1.2.1.5	Reversible
34DHXMANDACOX(NADP)	3,4-Dihydroxymandelaldehyde:NADP+ oxidoreductase	[c] : 34dhmald + h2o + nadp <==> 34dhoxmand + (2) h + nadph	Tyrosine metabolism	Cytosol	1.2.1.5	Reversible
3MOX4HOXPGALDOX(NADP)	3-Methoxy-4-hydroxyphenylglycolaldehyde:NADP+ oxidoreductase	[c] : 3m4hpga + h2o + nadp <==> 3mox4hoxm + (2) h + nadph	Tyrosine metabolism	Cytosol	1.2.1.5	Reversible
4HOXPACDOX(NADP)	4-Hydroxyphenylacetaldehyde:NADP+ oxidoreductase	[c] : 4hoxpacd + h2o + nadp <==> 4hphac + (2) h + nadph	Tyrosine metabolism	Cytosol	1.2.1.5	Reversible
34DHOXPEGOX	3,4-Dihydroxyphenylethyleneglycol:NAD+ oxidoreductase	[c] : 34dhmald + h + nadh <==> 34dhoxpeg + nad	Tyrosine metabolism	Cytosol	1.1.1.1	Reversible
IDHPOXOX3	Iodide:hydrogen-peroxide oxidoreductase 3	[c] : 35diotyr + 3ityr-L + h2o2 --> 2amac + (2) h2o + triodthy	Tyrosine metabolism	Cytosol	1.11.1.8	Irreversible
IDHPOXOX4	Iodide:hydrogen-peroxide oxidoreductase 4	[c] : (2) 35diotyr + h2o2 --> 2amac + (2) h2o + thyox-L	Tyrosine metabolism	Cytosol	1.11.1.8	Irreversible
PPNCL3	phosphopantothenate-cysteine ligase	[c] : 4ppan + atp + cys-L --> 4ppcys + amp + h + ppi	CoA Biosynthesis	Cytosol	6.3.2.5	Irreversible
PNTKm	pantothenate kinase (mitochondrial)	[m] : atp + pnto-R --> 4ppan + adp + h	CoA Biosynthesis	Mitochondria	2.7.1.33	Irreversible
THMTP	thiamine-triphosphatase	[c] : h2o + thmtp --> h + pi + thmpp	Thiamine Metabolism	Cytosol	3.6.1.28	Irreversible
TDP	thiamin pyrophosphatase	[c] : h2o + thmpp --> h + pi + thmmp	Thiamine Metabolism	Cytosol	3.6.1.15	Irreversible
PHETA1m	phenylalanine transaminase (m)	[m] : akg + phe-L <==> glu-L + phpyr	Phenylalanine metabolism	Mitochondria	2.6.1.58	Reversible
PHYCBOXL	L-Phenylalanine carboxy-lyase	[c] : h + phe-L --> co2 + peamn	Phenylalanine metabolism	Cytosol	4.1.1.28	Irreversible
ALDD19x(P)	aldehyde dehydrogenase (phenylacetaldehyde, NADP)	[c] : h2o + nadp + pacald --> (2) h + nadph + pac	Phenylalanine metabolism	Cytosol	1.2.1.39	Irreversible
QUILSYN	Quinolinate Synthase (Eukaryotic)	[c] : cmusa --> h + h2o + quln	Tryptophan metabolism	Cytosol		Irreversible
2OXOADOXm	2-Oxoadipate:lipoamde 2-oxidoreductase(decarboxylating and acceptor-succinylating) (mitochondria)	[m] : 2oxoadp + coa + nad --> co2 + glutcoa + nadh	Lysine Metabolism	Mitochondria	1.2.4.2	Irreversible
GLUTCOADHm	glutaryl-CoA dehydrogenase (mitochondria)	[m] : fad + glutcoa + h --> b2coa + co2 + fadh2	Tryptophan metabolism	Mitochondria	1.3.99.7	Irreversible
ECOAH1m	3-hydroxyacyl-CoA dehydratase (3-hydroxybutanoyl-CoA) (mitochondria)	[m] : 3hbcoa <==> b2coa + h2o	Tryptophan metabolism	Mitochondria	4.2.1.17	Reversible
ECOAH1x	3-hydroxyacyl-CoA dehydratase (3-hydroxybutanoyl-CoA) (perioxisome)	[x] : 3hbcoa <==> b2coa + h2o	Tryptophan metabolism	Peroxisome	4.2.1.17	Reversible
HACD1m	3-hydroxyacyl-CoA dehydrogenase (acetoacetyl-CoA) (mitochondria)	[m] : aacoa + h + nadh <==> 3hbcoa + nad	Tryptophan metabolism	Mitochondria	1.1.1.35	Reversible
HACD1x	3-hydroxyacyl-CoA dehydrogenase (acetoacetyl-CoA) (peroxisome)	[x] : aacoa + h + nadh <==> 3hbcoa + nad	Tryptophan metabolism	Peroxisome	1.1.1.35	Reversible
KYNAKGAT	L-Kynurenine:2-oxoglutarate aminotransferase	[c] : Lkynr + akg --> 4aphdob + glu-L	Tryptophan metabolism	Cytosol	2.6.1.7	Irreversible
3HKYNAKGAT	3-Hydroxy-L-kynurenine:2-oxoglutarate aminotransferase	[c] : akg + hLkynr --> 42A3HP24DB + glu-L	Tryptophan metabolism	Cytosol	2.6.1.7	Irreversible
DURAD	dihydrouracil dehydrogenase (NADP)	[c] : 56dura + nadp <==> h + nadph + ura	Pyrimidine Catabolism	Cytosol	1.3.1.2	Reversible
DURAD2	dihydrothymin dehydrogenase (NADP)	[c] : 56dthm + nadp <==> h + nadph + thym	Pyrimidine Catabolism	Cytosol	1.3.1.2	Reversible
ALCD2yf	alcohol dehydrogenase (ethanol, NADP), forward reaction	[c] : etoh + nadp --> acald + h + nadph	Glycolysis/Gluconeogenesis	Cytosol	1.1.1.2	Irreversible
ACITL	ATP-Citrate lyase	[c] : atp + cit + coa --> accoa + adp + oaa + pi	Citric Acid Cycle	Cytosol		Irreversible
NNATn	nicotinate-nucleotide adenylyltransferase	[n] : atp + h + nicrnt --> dnad + ppi	NAD Metabolism	Nucleus	2.7.7.18	Irreversible
NMNATn	nicotinamide-nucleotide adenylyltransferase	[n] : atp + h + nmn --> nad + ppi	NAD Metabolism	Nucleus	2.7.7.1	Irreversible
MCDp	Malonyl-CoA Decarboxylase peroxisomal	[x] : h + malcoa --> accoa + co2	Fatty Acid Metabolism	Peroxisome	4.1.1.9	Irreversible
MCD	Malonyl-CoA Decarboxylase cytoplasmic	[c] : h + malcoa --> accoa + co2	Fatty Acid Metabolism	Cytosol	4.1.1.9	Irreversible
G6PDH1er	glucose-6-phosphate dehydrogenase, endoplasmic reticulum	[r] : g6p + nad --> 6pgl + h + nadh	Pentose Phosphate Pathway	Endoplasmic Reticulum		Irreversible
PGLer	6-phosphogluconolactonase, endoplasmic reticulum	[r] : 6pgl + h2o --> 6pgc + h	Pentose Phosphate Pathway	Endoplasmic Reticulum	3.1.1.31	Irreversible
P4507A1r	cytochrome P450, family 7, subfamily A, polypeptide 1	[r] : chsterol + h + nadph + o2 --> h2o + nadp + xol7a	Bile Acid Biosynthesis	Endoplasmic Reticulum	1.14.13.17	Irreversible
P45046A1r	cytochrome P450, family 46, subfamily A, polypeptide 1	[r] : chsterol + h + nadph + o2 --> h2o + nadp + xol24oh	Bile Acid Biosynthesis	Endoplasmic Reticulum		Irreversible
CH25H	cholesterol 25-hydroxylase	[r] : chsterol + h + nadph + o2 --> h2o + nadp + xol25oh	Bile Acid Biosynthesis	Endoplasmic Reticulum		Irreversible
P45027A1m	Cytochrome P450 27	[m] : chsterol + h + nadph + o2 --> h2o + nadp + xol27oh	Bile Acid Biosynthesis	Mitochondria		Irreversible
P45039A1r	oxysterol 7-alpha-hydroxylase	[r] : h + nadph + o2 + xol24oh --> h2o + nadp + xoltri24	Bile Acid Biosynthesis	Endoplasmic Reticulum		Irreversible
P4507B11r	oxysterol 7alpha-hydroxylase	[r] : h + nadph + o2 + xol25oh --> h2o + nadp + xoltri25	Bile Acid Biosynthesis	Endoplasmic Reticulum		Irreversible
P4507B12r	oxysterol 7alpha-hydroxylase	[r] : h + nadph + o2 + xol27oh --> h2o + nadp + xoltri27	Bile Acid Biosynthesis	Endoplasmic Reticulum		Irreversible
5HXKYNDCL	5-Hydroxykynurenamine decarboxy-lyase	[c] : 5hxkyn + h --> 5hxkynam + co2	Tryptophan metabolism	Cytosol	4.1.1.28	Irreversible
3HXKYNDCL	3-Hydroxykynurenamine decarboxy-lyase	[c] : h + hLkynr --> 3hxkynam + co2	Tryptophan metabolism	Cytosol	2001-04-01	Irreversible
5HLTDL	5-Hydroxy-L-tryptophan decarboxy-lyase	[c] : 5htrp + h --> co2 + srtn	Tryptophan metabolism	Cytosol	4.1.1.28	Irreversible
LTDCL	L-Tryptophan decarboxy-lyase	[c] : h + trp-L --> co2 + trypta	Tryptophan metabolism	Cytosol	4.1.1.28	Irreversible
5HXKYNOXDA	5-Hydroxykynurenamine:oxygen oxidoreductase(deaminating)(flavin-containing)	[c] : 5hxkynam + o2 --> 46dhoxquin + h2o2 + nh4	Tryptophan metabolism	Cytosol	1.4.3.4	Irreversible
3HXKYNOXDA	3-Hydroxykynurenamine:oxygen oxidoreductase(deaminating)(flavin-containing)	[c] : 3hxkynam + o2 --> 48dhoxquin + h2o2 + nh4	Tryptophan metabolism	Cytosol	1.4.3.4	Irreversible
5HOXINOXDA	5-Hydroxytryptamine:oxygen oxidoreductase(deaminating)(flavin-containing)	[c] : h2o + o2 + srtn --> 5hoxindact + h2o2 + nh4	Tryptophan metabolism	Cytosol	1.4.3.4	Irreversible
TRYPTAOX	Tryptamine:oxygen oxidoreductase(deaminating)(flavin-containing)	[c] : h2o + o2 + trypta --> h2o2 + id3acald + nh4	Tryptophan metabolism	Cytosol	1.4.3.4	Irreversible
5HOXINDACTOX	5-Hydroxyindoleacetaldehyde:NAD+ oxidoreductase	[c] : 5hoxindact + h2o + nad --> 5hoxindoa + (2) h + nadh	Tryptophan metabolism	Cytosol	1.2.1.3	Irreversible
5HOXINDACTOXm	5-Hydroxyindoleacetaldehyde:NAD+ oxidoreductase (mito)	[m] : 5hoxindact + h2o + nad --> 5hoxindoa + (2) h + nadh	Tryptophan metabolism	Mitochondria	1.2.1.3	Irreversible
ACOAHi	acetyl-CoA hydrolase	[c] : accoa + h2o --> ac + coa + h	Pyruvate Metabolism	Cytosol	3.1.2.1	Irreversible
5HOXINDACTO2OX	5-Hydroxyindoleacetaldehyde:oxygen oxidoreductase	[c] : 5hoxindact + h2o + o2 --> 5hoxindoa + h + h2o2	Tryptophan metabolism	Cytosol	1.2.3.1	Irreversible
ACSOMT	S-Adenosyl-L-methionine:N-acetylserotonin O-methyltransferase	[c] : 5hoxindoa + amet --> 5moxact + ahcys + h	Tryptophan metabolism	Cytosol	2.1.1.4	Irreversible
ACSRTNMT	S-Adenosyl-L-homocysteine:N-acetylserotonin O-methyltransferase	[c] : Nacsertn + amet --> ahcys + h + melatn	Tryptophan metabolism	Cytosol	2.1.1.4	Irreversible
SRTNACT	Acetyl-CoA:aralkylamine N-acetyltransferase	[c] : accoa + srtn --> Nacsertn + coa + h	Tryptophan metabolism	Cytosol	2.3.1.87	Irreversible
MELATNOX	Melatonin:NADP oxidoreductase	[c] : h + melatn + nadph + o2 --> 6hoxmelatn + h2o + nadp	Tryptophan metabolism	Cytosol	1.14.14.1	Irreversible
MELATN23DOX	Melatonin:oxygen 2,3-dioxygenase (indole-decyclizing)	[c] : melatn + o2 --> fna5moxam	Tryptophan metabolism	Cytosol	1.13.11.42	Irreversible
5HTRPDOX	5-Hydroxy-L-tryptophan:oxygen 2,3-dioxygenase (indole-decyclizing)	[c] : 5htrp + o2 --> 5hoxnfkyn	Tryptophan metabolism	Cytosol	1.13.11.42	Irreversible
SRTN23OX	5-Hydroxytryptamine:oxygen 2,3-dioxygenase (indole-decyclizing)	[c] : o2 + srtn --> f5hoxkyn	Tryptophan metabolism	Cytosol	1.13.11.42	Irreversible
SRTNMTX	S-Adenosyl-L-methionine:amine N-methyltransferase (srtn)	[c] : amet + srtn --> ahcys + h + nmthsrtn	Tryptophan metabolism	Cytosol	2.1.1.49	Irreversible
LALDD	D-lactaldehyde dehydrogenase	[c] : lald-D + nadp <==> h + mthgxl + nadph	Pyruvate Metabolism	Cytosol	1.1.1.79	Reversible
LALDO	D-Lactaldehyde:NAD+ oxidoreductase (glutathione-formylating)	[c] : gthrd + lald-D + nad <==> h + lgt-S + nadh	Pyruvate Metabolism	Cytosol		Reversible
LALDO2	D-Lactaldehyde:NADP+ 1-oxidoreductase	[c] : h + mthgxl + nadph --> lald-D + nadp	Pyruvate Metabolism	Cytosol	1.1.1.21	Irreversible
G5SDym	glutamate-5-semialdehyde dehydrogenase (m)	[m] : glu5p + h + nadph --> glu5sa + nadp + pi	Urea cycle/amino group metabolism	Mitochondria	1.2.1.41	Irreversible
GLU5Km	glutamate 5-kinase (m)	[m] : atp + glu-L --> adp + glu5p	Urea cycle/amino group metabolism	Mitochondria	2.7.2.11	Irreversible
PPDOy	Propane-1,2-diol:NADP+ 1-oxidoreductase	[c] : h + lald-D + nadph --> 12ppd-R + nadp	Pyruvate Metabolism	Cytosol	1.1.1.21	Irreversible
F1PGT	fucose-1-phosphate guanylyltransferase	[c] : fuc1p-L + gtp + h <==> gdpfuc + ppi	Fructose and Mannose Metabolism	Cytosol	2.7.7.30	Reversible
FK	Fucokinase	[c] : atp + fuc-L --> adp + fuc1p-L + h	Fructose and Mannose Metabolism	Cytosol	2.7.1.52	Irreversible
GLYATm	glycine C-acetyltransferase	[m] : accoa + gly <==> 2aobut + coa	Glycine, Serine, and Threonine Metabolism	Mitochondria	2.3.1.29	Reversible
KHK	ketohexokinase	[c] : atp + fru --> adp + f1p + h	Fructose and Mannose Metabolism	Cytosol	2.7.1.3	Irreversible
HSD3B7	hydroxy-delta-5-steroid dehydrogenase, 3 beta- and steroid delta-isomerase 7	[r] : nad + xol7a --> h + nadh + xol7aone	Bile Acid Biosynthesis	Endoplasmic Reticulum		Irreversible
HSD3B7P	hydroxy-delta-5-steroid dehydrogenase, 3 beta- and steroid delta-isomerase 7	[r] : nadp + xol7a --> h + nadph + xol7aone	Bile Acid Biosynthesis	Endoplasmic Reticulum		Irreversible
AKR1D	aldo-keto reductase family 1, member D1 (delta 4-3-ketosteroid-5-beta-reductase)	[c] : h + nadph + xol7aone --> nadp + xol7ah	Bile Acid Biosynthesis	Cytosol		Irreversible
AKR1D2	aldo-keto reductase family 1, member D1 (delta 4-3-ketosteroid-5-beta-reductase)	[c] : h + nadph + xoldiolone --> nadp + xoldioloneh	Bile Acid Biosynthesis	Cytosol		Irreversible
AKR1C41	aldo-keto reductase family 1, member C4 (chlordecone reductase; 3-alpha hydroxysteroid dehydrogenase, type I; dihydrodiol dehydrogenase 4)	[c] : h + nadh + xol7ah --> nad + xol7ah2	Bile Acid Biosynthesis	Cytosol	1.1.1.50	Irreversible
AKR1C42	aldo-keto reductase family 1, member C4 (chlordecone reductase; 3-alpha hydroxysteroid dehydrogenase, type I; dihydrodiol dehydrogenase 4)	[c] : h + nadh + xoldioloneh --> nad + xoltriol	Bile Acid Biosynthesis	Cytosol	1.1.1.50	Irreversible
P45027A11m	5-beta-cholestane-3-alpha,7-alpha,12-alpha-triol 27-hydroxylase	[m] : h + nadph + o2 + xoltriol --> h2o + nadp + xoltetrol	Bile Acid Biosynthesis	Mitochondria	1.14.13.15	Irreversible
P45027A12m	5-beta-cholestane-3-alpha,7-alpha,12-alpha-triol 27-hydroxylase	[m] : nadp + xoltetrol --> h + nadph + thcholst	Bile Acid Biosynthesis	Mitochondria	1.14.13.15	Irreversible
AMACRp	alpha-methylacyl-CoA racemase	[x] : cholcoar --> cholcoas	Bile Acid Biosynthesis	Peroxisome	5.1.99.4	Irreversible
AMACRr	alpha-methylacyl-CoA racemase	[r] : cholcoar --> cholcoas	Bile Acid Biosynthesis	Endoplasmic Reticulum	5.1.99.4	Irreversible
HSD17B4x	hydroxysteroid (17-beta) dehydrogenase 4	[x] : cholcoads + h + nadph + o2 --> cholcoaone + h2o + nadp	Bile Acid Biosynthesis	Peroxisome		Irreversible
ADPRDPm	ADPribose diphosphatase (mitochondrial)	[m] : adprib + h2o --> amp + (2) h + r5p	Nucleotides	Mitochondria	3.6.1.13	Irreversible
ADPGLC	ADPglucose diphosphatase	[c] : adpglc + h2o --> amp + g1p + (2) h	Nucleotides	Cytosol	3.6.1.21	Irreversible
ADPMAN	ADPmannose diphosphatase	[c] : adpman + h2o --> amp + (2) h + man1p	Nucleotides	Cytosol	3.6.1.21	Irreversible
SCPx	peroxisomal thiolase 2	[x] : cholcoaone + coa --> cholcoa + ppcoa	Bile Acid Biosynthesis	Peroxisome		Irreversible
P4508B11r	sterol 12-alpha-hydroxylase	[r] : h + nadph + o2 + xol7aone --> h2o + nadp + xoldiolone	Bile Acid Biosynthesis	Endoplasmic Reticulum		Irreversible
P4508B13r	sterol 12-alpha-hydroxylase (nadh)	[r] : h + nadh + o2 + xol7aone --> h2o + nad + xoldiolone	Bile Acid Biosynthesis	Endoplasmic Reticulum		Irreversible
ACOX2x	acyl-Coenzyme A oxidase 2, branched chain	[x] : cholcoas + fadh2 + o2 --> cholcoads + fad + (2) h2o	Bile Acid Biosynthesis	Peroxisome	1.3.3.6	Irreversible
ARGNm	arginase (m)	[m] : arg-L + h2o --> orn + urea	Urea cycle/amino group metabolism	Mitochondria	3.5.3.1	Irreversible
HMGCOASim	Hydroxymethylglutaryl CoA synthase (ir)	[m] : aacoa + accoa + h2o --> coa + h + hmgcoa	Cholesterol Metabolism	Mitochondria	4.1.3.5	Irreversible
ORNTArm	ornithine transaminase reversible (m)	[m] : akg + orn <==> glu-L + glu5sa	Urea cycle/amino group metabolism	Mitochondria	2.6.1.13	Reversible
GLYAMDTRc	glycine amidinotransferase (c)	[c] : arg-L + gly <==> gudac + orn	Urea cycle/amino group metabolism	Cytosol	2.1.4.1	Reversible
GACMTRc	guanidinoacetate N-methyltransferase (c)	[c] : amet + gudac <==> ahcys + creat + h	Urea cycle/amino group metabolism	Cytosol	2.1.1.2	Reversible
CKc	ATP Creatine kinase (c)	[c] : atp + creat <==> adp + pcreat	Urea cycle/amino group metabolism	Cytosol	2.7.3.2	Reversible
SARDHm	Sarcosine dehydrogenase (m)	[m] : fad + sarcs + thf --> fadh2 + gly + mlthf	Urea cycle/amino group metabolism	Mitochondria	1.5.99.1	Irreversible
ACACT1x	acetyl-CoA C-acetyltransferase, mitochondrial	[x] : (2) accoa --> aacoa + coa	Cholesterol Metabolism	Peroxisome	2.3.1.9	Irreversible
HMGLx	hydroxymethylglutaryl-CoA lyase	[x] : hmgcoa --> acac + accoa	Cholesterol Metabolism	Peroxisome	4.1.3.4	Irreversible
HMGCOARr	Hydroxymethylglutaryl CoA reductase (ir)	[r] : (2) h + hmgcoa + (2) nadph --> coa + mev-R + (2) nadp	Cholesterol Metabolism	Endoplasmic Reticulum	1.1.1.34	Irreversible
HMGCOARx	Hydroxymethylglutaryl CoA reductase (ir)	[x] : (2) h + hmgcoa + (2) nadph --> coa + mev-R + (2) nadp	Cholesterol Metabolism	Peroxisome	1.1.1.34	Irreversible
MEVK1x	mevalonate kinase (atp)	[x] : atp + mev-R --> 5pmev + adp + h	Cholesterol Metabolism	Peroxisome	2.7.1.36	Irreversible
PMEVKx	phosphomevalonate kinase	[x] : 5pmev + atp --> 5dpmev + adp	Cholesterol Metabolism	Peroxisome	2.7.4.2	Irreversible
DPMVDx	diphosphomevalonate decarboxylase	[x] : 5dpmev + atp --> adp + co2 + ipdp + pi	Cholesterol Metabolism	Peroxisome	4.1.1.33	Irreversible
IPDDIx	isopentenyl-diphosphate D-isomerase	[x] : ipdp <==> dmpp	Cholesterol Metabolism	Peroxisome	5.3.3.2	Reversible
NTPP9	Nucleoside triphosphate pyrophosphorylase (itp)	[c] : h2o + itp --> h + imp + ppi	Nucleotides	Cytosol	3.6.1.19	Irreversible
GRTTx	geranyltranstransferase	[x] : grdp + ipdp --> frdp + ppi	Cholesterol Metabolism	Peroxisome	2.5.1.10	Irreversible
DMATTx	dimethylallyltranstransferase	[x] : dmpp + ipdp --> grdp + ppi	Cholesterol Metabolism	Peroxisome	2.5.1.1	Irreversible
SQLSr	Squalene synthase	[r] : (2) frdp + h + nadph --> nadp + (2) ppi + sql	Cholesterol Metabolism	Endoplasmic Reticulum	2.5.1.21	Irreversible
NTPP10	Nucleoside triphosphate pyrophosphorylase (ditp)	[c] : ditp + h2o --> dimp + h + ppi	Nucleotides	Cytosol	3.6.1.19	Irreversible
NTPP11	Nucleoside triphosphate pyrophosphorylase (xtp)	[c] : h2o + xtp --> h + ppi + xmp	Nucleotides	Cytosol	3.6.1.19	Irreversible
LNSTLSr	lanosterol synthase	[r] : Ssq23epx --> lanost	Cholesterol Metabolism	Endoplasmic Reticulum	5.4.99.7	Irreversible
LNS14DMr	cytochrome P450 lanosterol 14-alpha-demethylase	[r] : (2) h + lanost + (3) nadph + (3) o2 --> 44mctr + for + (4) h2o + (3) nadp	Cholesterol Metabolism	Endoplasmic Reticulum	1.14.14.1	Irreversible
C14STRr	C-14 sterol reductase	[r] : 44mctr + h + nadph --> 44mzym + nadp	Cholesterol Metabolism	Endoplasmic Reticulum	1.3.1.70	Irreversible
C4STMO1r	C-4 sterol methyl oxidase (4,4-dimethylzymosterol)	[r] : 44mzym + (3) h + (3) nadph + (3) o2 --> 4mzym_int1 + (4) h2o + (3) nadp	Cholesterol Metabolism	Endoplasmic Reticulum		Irreversible
C3STDH1r	C-3 sterol dehydrogenase (4-methylzymosterol)	[r] : 4mzym_int1 + nad --> 4mzym_int2 + co2 + h + nadh	Cholesterol Metabolism	Endoplasmic Reticulum	5.3.3.1	Irreversible
C4STMO2r	C-4 methyl sterol oxidase	[r] : 4mzym_int2 + nad + o2 --> co2 + h + nadh + zym_int2	Cholesterol Metabolism	Endoplasmic Reticulum		Irreversible
C3STKR2r	C-3 sterol keto reductase (zymosterol)	[r] : h + nadph + zym_int2 --> nadp + zymst	Cholesterol Metabolism	Endoplasmic Reticulum		Irreversible
NBAHH_ir	Nalpha-(beta-alanyl)-L-histidine hydrolase IR	[c] : carn + h2o --> ala-B + his-L	beta-Alanine metabolism	Cytosol	3.4.13.3	Irreversible
BAMPPALDOXm	beta-Aminopropion aldehyde:NAD+ oxidoreductase (m)	[m] : bamppald + h2o + nad --> ala-B + (2) h + nadh	beta-Alanine metabolism	Mitochondria	1.2.1.3	Irreversible
BAMPPALDOX	beta-Aminopropion aldehyde:NAD+ oxidoreductase	[c] : bamppald + h2o + nad --> ala-B + (2) h + nadh	beta-Alanine metabolism	Cytosol	1.2.1.3	Irreversible
EBP1r	3-beta-hydroxysteroid-delta(8),delta(7)-isomerase	[r] : zymst --> chlstol	Cholesterol Metabolism	Endoplasmic Reticulum	5.3.3.5	Irreversible
EBP2r	3-beta-hydroxysteroid-delta(8),delta(7)-isomerase	[r] : zymstnl --> lthstrl	Cholesterol Metabolism	Endoplasmic Reticulum	5.3.3.5	Irreversible
LSTO1r	Lathosterol oxidase	[r] : chlstol + h + nadph + o2 --> ddsmsterol + (2) h2o + nadp	Cholesterol Metabolism	Endoplasmic Reticulum	1.3.3.2	Irreversible
LSTO2r	Lathosterol oxidase	[r] : h + lthstrl + nadph + o2 --> 7dhchsterol + (2) h2o + nadp	Cholesterol Metabolism	Endoplasmic Reticulum	1.3.3.2	Irreversible
DHCR71r	7-dehydrocholesterol reductase	[r] : ddsmsterol + h + nadph --> dsmsterol + nadp	Cholesterol Metabolism	Endoplasmic Reticulum	1.3.1.21	Irreversible
DHCR72r	7-dehydrocholesterol reductase	[r] : 7dhchsterol + h + nadph --> chsterol + nadp	Cholesterol Metabolism	Endoplasmic Reticulum	1.3.1.21	Irreversible
DHCR241r	24-dehydrocholesterol reductase [Precursor]	[r] : fadh2 + zymst --> fad + zymstnl	Cholesterol Metabolism	Endoplasmic Reticulum		Irreversible
DHCR242r	24-dehydrocholesterol reductase [Precursor]	[r] : chlstol + fadh2 --> fad + lthstrl	Cholesterol Metabolism	Endoplasmic Reticulum		Irreversible
DHCR243r	24-dehydrocholesterol reductase [Precursor]	[r] : dsmsterol + fadh2 --> chsterol + fad	Cholesterol Metabolism	Endoplasmic Reticulum		Irreversible
UPPN	b-ureidopropionase	[c] : cala + (2) h + h2o --> ala-B + co2 + nh4	Pyrimidine Catabolism	Cytosol	3.5.1.6	Irreversible
3HPCOAHYD	3-hydroxyisobutyryl-Coenzyme A hydrolase	[c] : 3hpcoa + h2o --> 3hpp + coa + h	beta-Alanine metabolism	Cytosol	3.1.2.4	Irreversible
PRPNCOAHYDx	Propenoyl-CoA hydrolase (x)	[x] : h2o + prpncoa --> 3hpcoa	beta-Alanine metabolism	Peroxisome	4.2.1.17	Irreversible
PRPNCOAHYDm	Propenoyl-CoA hydrolase (m)	[m] : h2o + prpncoa --> 3hpcoa	beta-Alanine metabolism	Mitochondria	4.2.1.17	Irreversible
NDPK10	nucleoside-diphosphate kinase (ATP:dIDP)	[c] : atp + didp <==> adp + ditp	Nucleotides	Cytosol	2.7.4.6	Reversible
NDPK1n	nucleoside-diphosphate kinase (ATP:GDP), nuclear	[n] : atp + gdp <==> adp + gtp	Nucleotides	Nucleus	2.7.4.6	Reversible
NDPK2n	nucleoside-diphosphate kinase (ATP:UDP), nuclear	[n] : atp + udp <==> adp + utp	Nucleotides	Nucleus	2.7.4.6	Reversible
NDPK3n	nucleoside-diphosphate kinase (ATP:CDP),nuclear	[n] : atp + cdp <==> adp + ctp	Nucleotides	Nucleus	2.7.4.6	Reversible
NDPK2m	nucleoside-diphosphate kinase (ATP:UDP), mitochondrial	[m] : atp + udp <==> adp + utp	Nucleotides	Mitochondria	2.7.4.6	Reversible
NDPK1m	nucleoside-diphosphate kinase (ATP:GDP), mitochondrial	[m] : atp + gdp <==> adp + gtp	Nucleotides	Mitochondria	2.7.4.6	Reversible
NDPK10n	nucleoside-diphosphate kinase (ATP:dIDP), nuclear	[n] : atp + didp <==> adp + ditp	Nucleotides	Nucleus	2.7.4.6	Reversible
NDPK10m	nucleoside-diphosphate kinase (ATP:dIDP), mitochondrial	[m] : atp + didp <==> adp + ditp	Nucleotides	Mitochondria	2.7.4.6	Reversible
NDPK3m	nucleoside-diphosphate kinase (ATP:CDP), mitochondrial	[m] : atp + cdp <==> adp + ctp	Nucleotides	Mitochondria	2.7.4.6	Reversible
NDPK4n	nucleoside-diphosphate kinase (ATP:dTDP), nuclear	[n] : atp + dtdp <==> adp + dttp	Nucleotides	Nucleus	2.7.4.6	Reversible
NDPK4m	nucleoside-diphosphate kinase (ATP:dTDP), mitochondrial	[m] : atp + dtdp <==> adp + dttp	Nucleotides	Mitochondria	2.7.4.6	Reversible
NDPK5n	nucleoside-diphosphate kinase (ATP:dGDP), nuclear	[n] : atp + dgdp <==> adp + dgtp	Nucleotides	Nucleus	2.7.4.6	Reversible
NDPK5m	nucleoside-diphosphate kinase (ATP:dGDP), mitochondrial	[m] : atp + dgdp <==> adp + dgtp	Nucleotides	Mitochondria	2.7.4.6	Reversible
NDPK6n	nucleoside-diphosphate kinase (ATP:dUDP), nuclear	[n] : atp + dudp <==> adp + dutp	Nucleotides	Nucleus	2.7.4.6	Reversible
NDPK6m	nucleoside-diphosphate kinase (ATP:dUDP), mitochondrial	[m] : atp + dudp <==> adp + dutp	Nucleotides	Mitochondria	2.7.4.6	Reversible
NDPK7n	nucleoside-diphosphate kinase (ATP:dCDP), nuclear	[n] : atp + dcdp <==> adp + dctp	Nucleotides	Nucleus	2.7.4.6	Reversible
NDPK7m	nucleoside-diphosphate kinase (ATP:dCDP), mitochondrial	[m] : atp + dcdp <==> adp + dctp	Nucleotides	Mitochondria	2.7.4.6	Reversible
NDPK8n	nucleoside-diphosphate kinase (ATP:dADP), nuclear	[n] : atp + dadp <==> adp + datp	Nucleotides	Nucleus	2.7.4.6	Reversible
NDPK8m	nucleoside-diphosphate kinase (ATP:dADP), mitochondrial	[m] : atp + dadp <==> adp + datp	Nucleotides	Mitochondria	2.7.4.6	Reversible
NDPK9n	nucleoside-diphosphate kinase (ATP:IDP), nuclear	[n] : atp + idp <==> adp + itp	Nucleotides	Nucleus	2.7.4.6	Reversible
NDPK9m	nucleoside-diphosphate kinase (ATP:IDP), mitochondrial	[m] : atp + idp <==> adp + itp	Nucleotides	Mitochondria	2.7.4.6	Reversible
XANDp	xanthine dehydrogenase, peroxisomal	[x] : h2o + nad + xan --> h + nadh + urate	Purine Catabolism	Peroxisome	1.1.1.204	Irreversible
DCK1n	Deoxycytidine kinase, nuclear (ATP)	[n] : atp + dcyt <==> adp + dcmp + h	Nucleotides	Nucleus	2.7.1.74	Reversible
DCK2n	Deoxycytidine kinase, nuclear (UTP)	[n] : dcyt + utp <==> dcmp + h + udp	Nucleotides	Nucleus	2.7.1.74	Reversible
CHOLD2m	choline dehydrogenase (FAD acceptor), mitochondrial	[m] : chol + fad --> betald + fadh2	Glycine, Serine, and Threonine Metabolism	Mitochondria	1.1.99.1	Irreversible
BHMT	betaine-homocysteine S-methyltransferase	[c] : glyb + hcys-L --> dmgly + met-L	Glycine, Serine, and Threonine Metabolism	Cytosol	2.1.1.5	Irreversible
3SALACBOXL	3-Sulfino-L-alanine carboxy-lyase	[c] : 3sala + h --> co2 + hyptaur	Taurine and hypotaurine metabolism	Cytosol	4.1.1.15	Irreversible
LCYSTCBOXL	3-Sulfoalanine carboxy-lyase	[c] : Lcyst + h --> co2 + taur	Taurine and hypotaurine metabolism	Cytosol	4.1.1.15	Irreversible
GNMT	glycine N-methyltransferase	[c] : amet + gly --> ahcys + h + sarcs	Glycine, Serine, and Threonine Metabolism	Cytosol	2.1.1.20	Irreversible
UAG4E	UDP-N-acetylglucosamine 4-epimerase	[c] : uacgam <==> udpacgal	Aminosugar Metabolism	Cytosol	5.1.3.7	Reversible
P45017A2r	Cytochrome P450 17A1	[r] : 17ahprgnlone + h + nadph + (0.5) o2 --> acald + dhea + h2o + nadp	Steroid Metabolism	Endoplasmic Reticulum	1.14.99.9	Irreversible
P45017A1r	Cytochrome P450 17A1	[r] : h + nadph + o2 + prgnlone --> 17ahprgnlone + h2o + nadp	Steroid Metabolism	Endoplasmic Reticulum	1.14.99.9	Irreversible
HSD3B11	3 beta-hydroxysteroid dehydrogenase/delta 5-->4-isomerase type I	[c] : nad + prgnlone --> h + nadh + prgstrn	Steroid Metabolism	Cytosol		Irreversible
HSD3B13	3 beta-hydroxysteroid dehydrogenase/delta 5-->4-isomerase type I	[c] : 17ahprgnlone + nad --> 17ahprgstrn + h + nadh	Steroid Metabolism	Cytosol		Irreversible
LACZly	b-galactosidase,lysosomal	[l] : h2o + lcts --> gal + glc-D	Galactose metabolism	Lysosome	3.2.1.23	Irreversible
UGALGTg	UDPgalactose:D-glucose 4-beta-D-galactosyltransferase, Golgi apparatus	[g] : glc-D + udpgal --> h + lcts + udp	Galactose metabolism	Golgi Apparatus	2.4.1.22	Irreversible
P45011B11m	Steroid 11-beta-hydroxylase	[m] : 11docrtstrn + h + nadph + o2 --> crtstrn + h2o + nadp	Steroid Metabolism	Mitochondria	1.14.15.4	Irreversible
P45011B12m	Steroid 11-beta-hydroxylase	[m] : 11docrtsl + h + nadph + o2 --> crtsl + h2o + nadp	Steroid Metabolism	Mitochondria	1.14.15.4	Irreversible
P45021A2r	Steroid 21-hydroxylase	[r] : 17ahprgstrn + h + nadph + o2 --> 11docrtsl + h2o + nadp	Steroid Metabolism	Endoplasmic Reticulum	1.14.99.10	Irreversible
P45021A1r	Steroid 21-hydroxylase	[r] : h + nadph + o2 + prgstrn --> 11docrtstrn + h2o + nadp	Steroid Metabolism	Endoplasmic Reticulum	1.14.99.10	Irreversible
GALOR	D-Galactose:NADP+ 1-oxidoreductase	[c] : gal + h + nadph <==> galt + nadp	Galactose metabolism	Cytosol	1.1.1.21	Reversible
SARCOXp	sarcosine oxidase, peroxisomal	[x] : h2o + o2 + sarcs --> fald + gly + h2o2	Glycine, Serine, and Threonine Metabolism	Peroxisome	1.5.3.1	Irreversible
LPCOXp	L-pipecolate oxidase, peroxisomal	[x] : Lpipecol + o2 --> h + h2o2 + thp2c	Lysine Metabolism	Peroxisome	1.5.3.7	Irreversible
P45017A3r	Cytochrome P450 17A1	[r] : h + nadph + o2 + prgstrn --> 17ahprgstrn + h2o + nadp	Steroid Metabolism	Endoplasmic Reticulum	1.14.99.9	Irreversible
P45017A4r	Cytochrome P450 17A1	[r] : 17ahprgstrn + h + nadph + (0.5) o2 --> acald + andrstndn + h2o + nadp	Steroid Metabolism	Endoplasmic Reticulum	1.14.99.9	Irreversible
HSD17B1	testicular 17-beta-hydroxysteroid dehydrogenase	[c] : estrone + h + nadph <==> estradiol + nadp	Steroid Metabolism	Cytosol	1.1.1.62	Reversible
P45011B21m	Steroid 11-beta-hydroxylase	[m] : 11docrtstrn + h + nadph + (2) o2 --> aldstrn + (2) h2o + nadp	Steroid Metabolism	Mitochondria	1.14.15.4	Irreversible
EPCTX	ethanolamine-phosphate cytidylyltransferase	[c] : 2ameph + ctp + h --> cmp2amep + ppi	Glycerophospholipid Metabolism	Cytosol	2.7.7.14	Irreversible
PDE1g	3',5'-cyclic-nucleotide phosphodiesterase,Golgi	[g] : camp + h2o --> amp + h	Nucleotides	Golgi Apparatus	3.1.4.17	Irreversible
PDE4g	3',5'-cyclic-nucleotide phosphodiesterase, Golgi	[g] : 35cgmp + h2o --> gmp + h	Nucleotides	Golgi Apparatus	3.1.4.17	Irreversible
CPCTDTX	choline-phosphate cytidylyltransferase	[c] : ctp + h + ntm2amep --> cmpntm2amep + ppi	Glycerophospholipid Metabolism	Cytosol	2.7.7.15	Irreversible
P45019A1r	aromatase	[r] : andrstndn + nadph + (2) o2 --> estrone + for + (2) h2o + nadp	Steroid Metabolism	Endoplasmic Reticulum	1.14.14.1	Irreversible
P45019A2r	aromatase	[r] : nadph + (2) o2 + tststerone --> estradiol + for + (2) h2o + nadp	Steroid Metabolism	Endoplasmic Reticulum	1.14.14.1	Irreversible
SR5ARr	3-oxo-5-alpha-steroid 4-dehydrogenase	[r] : h + nadph + tststerone --> 5adtststerone + nadp	Steroid Metabolism	Endoplasmic Reticulum	1.3.99.5	Irreversible
HSD17B3r	testicular 17-beta-hydroxysteroid dehydrogenase	[r] : andrstndn + h + nadph --> nadp + tststerone	Steroid Metabolism	Endoplasmic Reticulum	1.1.1.62	Irreversible
HSD3B11r	3 beta-hydroxysteroid dehydrogenase/delta 5-->4-isomerase type I	[r] : nad + prgnlone --> h + nadh + prgstrn	Steroid Metabolism	Endoplasmic Reticulum		Irreversible
HSD3B12r	3 beta-hydroxysteroid dehydrogenase/delta 5-->4-isomerase type I	[r] : dhea + nad --> andrstndn + h + nadh	Steroid Metabolism	Endoplasmic Reticulum		Irreversible
HSD3B13r	3 beta-hydroxysteroid dehydrogenase/delta 5-->4-isomerase type I	[r] : 17ahprgnlone + nad --> 17ahprgstrn + h + nadh	Steroid Metabolism	Endoplasmic Reticulum		Irreversible
HSD17B7r	testicular 17-beta-hydroxysteroid dehydrogenase	[r] : estrone + h + nadph --> estradiol + nadp	Steroid Metabolism	Endoplasmic Reticulum	1.1.1.62	Irreversible
PGDIr	Prostaglandin-H2 D-isomerase [Precursor]	[r] : prostgh2 <==> prostgd2	Eicosanoid Metabolism	Endoplasmic Reticulum	5.3.99.2	Reversible
PGDI	Prostaglandin-H2 D-isomerase [Precursor]	[c] : prostgh2 <==> prostgd2	Eicosanoid Metabolism	Cytosol	5.3.99.2	Reversible
PGESr	Prostaglandin E synthase	[r] : prostgh2 <==> prostge2	Eicosanoid Metabolism	Endoplasmic Reticulum	5.3.99.3	Reversible
MALTly	alpha-glucosidase, lysosomal	[l] : h2o + malt --> (2) glc-D	Starch and Sucrose Metabolism	Lysosome	3.2.1.20	Irreversible
MLTG1ly	Maltodextrin glucosidase (maltotriose), lysosome	[l] : h2o + malttr --> glc-D + malt	Starch and Sucrose Metabolism	Lysosome		Irreversible
PGISr	Prostaglandin I2 synthase	[r] : prostgh2 <==> prostgi2	Eicosanoid Metabolism	Endoplasmic Reticulum	5.3.99.4	Reversible
LTA4H	Leukotriene A-4 hydrolase	[c] : h2o + leuktrA4 --> leuktrB4	Eicosanoid Metabolism	Cytosol	3.3.2.6	Irreversible
GGT5r	Gamma-glutamyltransferase 5	[r] : h2o + leuktrC4 <==> glu-L + leuktrD4	Eicosanoid Metabolism	Endoplasmic Reticulum	2.3.2.2	Reversible
TXASr	Thromboxane-A synthase	[r] : prostgh2 --> txa2	Eicosanoid Metabolism	Endoplasmic Reticulum	5.3.99.5	Irreversible
GLCter	glucose transport, endoplasmic reticulum	glc-D[c] <==> glc-D[r]	Transport, Endoplasmic Reticular	Cytosol, Endoplasmic Reticulum		Reversible
PIter	phosphate transport, endoplasmic reticulum	pi[r] <==> pi[c]	Transport, Endoplasmic Reticular	Cytosol, Endoplasmic Reticulum		Reversible
SELCYSTGL	selanocystathionine g-lyase	[c] : h2o + selcyst --> 2obut + nh4 + selcys	Selenoamino acid metabolism	Cytosol	4.4.1.1	Irreversible
SELCYSTS	selanocystathionine beta-synthase	[c] : selhcys + ser-L --> h2o + selcyst	Selenoamino acid metabolism	Cytosol	4.2.1.22	Irreversible
SEAHCYSHYD	Se-Adenosylselenohomocysteine hydrolase	[c] : h2o + seahcys --> adn + selhcys	Selenoamino acid metabolism	Cytosol	3.3.1.1	Irreversible
SELMETAT	selenomethionine adenosyltransferase	[c] : atp + h2o + selmeth --> pi + ppi + seasmet	Selenoamino acid metabolism	Cytosol	2.5.1.6	Irreversible
SELADT	selenate adenylyltransferase	[c] : atp + h + sel --> adsel + ppi	Selenoamino acid metabolism	Cytosol	2.7.7.4	Irreversible
ADSELK	adenylyl-selenate kinase	[c] : adsel + atp --> 3padsel + adp + h	Selenoamino acid metabolism	Cytosol	2.7.1.25	Irreversible
SELCYSLY	selenocysteine lyase	[c] : dtt + selcys --> ala-L + dttOX + h + seln	Selenoamino acid metabolism	Cytosol	4.4.1.16	Irreversible
AP4AH1	Ap4A hydrolase, asymmetrically	[c] : ap4a + h2o --> amp + atp + (2) h	Nucleotides	Cytosol	3.6.1.17	Irreversible
PPAer	inorganic diphosphatase, endoplasmic reticulum	[r] : h2o + ppi --> h + (2) pi	Miscellaneous	Endoplasmic Reticulum	3.6.1.1	Irreversible
ICDHyrm	Isocitrate dehydrogenase (NADP+)	[m] : icit + nadp <==> akg + co2 + nadph	Citric Acid Cycle	Mitochondria	1.1.1.42	Reversible
G6PDH2rer	glucose 6-phosphate dehydrogenase, endoplasmic reticulum	[r] : g6p + nadp <==> 6pgl + h + nadph	Pentose Phosphate Pathway	Endoplasmic Reticulum		Reversible
G6PDH1rer	glucose-6-phosphate dehydrogenase, endoplasmic reticulum	[r] : g6p + nad <==> 6pgl + h + nadh	Pentose Phosphate Pathway	Endoplasmic Reticulum		Reversible
GLGNS1	glycogen synthase (ggn -> glygn1)	[c] : ggn + (3) udpg --> glygn1 + (3) h + (3) udp	Starch and Sucrose Metabolism	Cytosol	2.4.1.11	Irreversible
GLBRAN	1,4-alpha-glucan branching enzyme (glygn1 -> glygn2)	[c] : glygn1 --> glygn2	Starch and Sucrose Metabolism	Cytosol	2.4.1.18	Irreversible
GLPASE1	glycogen phosphorylase (glygn2 -> dxtrn)	[c] : glygn2 + (3) pi --> dxtrn + (3) g1p	Starch and Sucrose Metabolism	Cytosol	2.4.1.1	Irreversible
GLDBRAN	glycogen debranching enzyme	[c] : dxtrn + h2o --> glc-D + glygn3	Starch and Sucrose Metabolism	Cytosol	3.2.1.33	Irreversible
UDPGP	UDPglucose pyrophosphohydrolase	[c] : h2o + udpg --> g1p + (2) h + ump	Starch and Sucrose Metabolism	Cytosol	3.6.1.9	Irreversible
GUACYC	guanylate cyclase	[c] : gtp --> 35cgmp + ppi	Nucleotides	Cytosol	4.6.1.2	Irreversible
CYTK3	cytidylate kinase (CMP)(GTP)	[c] : cmp + gtp <==> cdp + gdp	Nucleotides	Cytosol		Reversible
CYTK4	cytidylate kinase (dCMP)(GTP)	[c] : dcmp + gtp <==> dcdp + gdp	Nucleotides	Cytosol		Reversible
GGNG	glycogenin self-glucosylation	[c] : Tyr-ggn + (8) udpg --> ggn + (8) h + (8) udp	Starch and Sucrose Metabolism	Cytosol		Irreversible
GLPASE2	glycogen phosphorylase (amyls -> glc-D)	[c] : glygn3 + (7) h2o --> Tyr-ggn + (7) glc-D	Starch and Sucrose Metabolism	Cytosol	2.4.1.1	Irreversible
DCYTDn	deoxycytidine deaminase, nuclear	[n] : dcyt + h + h2o --> duri + nh4	Nucleotides	Nucleus	3.5.4.14	Irreversible
CYTDn	cytidine deaminase, nuclear	[n] : cytd + h + h2o --> nh4 + uri	Nucleotides	Nucleus	3.5.4.5	Irreversible
DURIK1m	deoxyuridine kinase (ATP:Deoxyuridine), mitochondrial	[m] : atp + duri --> adp + dump + h	Nucleotides	Mitochondria		Irreversible
DUTPDPn	dUTP diphosphatase, nuclear	[n] : dutp + h2o --> dump + h + ppi	Nucleotides	Nucleus	3.6.1.23	Irreversible
TRDR2	Thioredoxin (ubiquinone 10) reductase (NADPH)	[c] : h + nadph + q10 --> nadp + q10h2	Miscellaneous	Cytosol	1.8.1.9	Irreversible
TRDR3	Thioredoxin (ubiquinone 10) reductase (NADH)	[c] : h + nadh + q10 --> nad + q10h2	Miscellaneous	Cytosol	1.8.1.9	Irreversible
UDPGNP	UDPglucuronate uridine-diphosphohydrolase	[c] : h2o + udpglcur --> glcur + h + udp	Pentose and Glucuronate Interconversions	Cytosol		Irreversible
GULN3D	L-gulonate 3-dehydrogenase	[c] : guln + nad <==> 3dhguln + h + nadh	Pentose and Glucuronate Interconversions	Cytosol	1.1.1.45	Reversible
DGULND	dehydro-L-gulonate decarboxylase	[c] : 3dhguln + h <==> co2 + xylu-L	Pentose and Glucuronate Interconversions	Cytosol	4.1.1.34	Reversible
XYLUR	xylulose reductase	[c] : h + nadph + xylu-L <==> nadp + xylt	Pentose and Glucuronate Interconversions	Cytosol	1.1.1.10	Reversible
XYLTD_Dr	xylitol dehydrogenase (D-xyulose-forming)	[c] : nad + xylt <==> h + nadh + xylu-D	Pentose and Glucuronate Interconversions	Cytosol	1.1.1.9	Reversible
ABTD	L-arabinitol 4-dehydrogenase	[c] : abt + nad <==> h + nadh + xylu-L	Pentose and Glucuronate Interconversions	Cytosol	1.1.1.12	Reversible
NOS1	Nitric Oxide Synthase (intermediate forming)	[c] : arg-L + h + nadph + o2 --> h2o + nadp + nwharg	Arginine and Proline Metabolism	Cytosol	1.14.13.39	Irreversible
NOS2	Nitric Oxide Synthase (NO forming)	[c] : nadph + (2) nwharg + (2) o2 --> (2) citr-L + h + (2) h2o + nadp + (2) no	Arginine and Proline Metabolism	Cytosol	1.14.13.39	Irreversible
PROD2m	Proline dehydrogenase (m)	[m] : fad + pro-L --> 1pyr5c + fadh2 + h	Arginine and Proline Metabolism	Mitochondria	1.5.99.8	Irreversible
PROAKGOX1r	L-Proline,2-oxoglutarate:oxygen oxidoreductase (4-hydroxylating) (ER)	[r] : akg + o2 + pro-L --> 4hpro-LT + co2 + succ	Arginine and Proline Metabolism	Endoplasmic Reticulum	1.14.11.2	Irreversible
GLACO	D-Glucuronolactone:NAD+ oxidoreductase	[c] : glac + (2) h2o + nad --> glcr + (3) h + nadh	Ascorbate and Aldarate Metabolism	Cytosol	1.2.1.3	Irreversible
MCLOR	3-Mercaptolactate:NAD+ oxidoreductase	[c] : mercplac + nad <==> h + mercppyr + nadh	Cysteine Metabolism	Cytosol	1.1.1.27	Reversible
GLACOm	D-Glucuronolactone:NAD+ oxidoreductase, mitochondrial	[m] : glac + (2) h2o + nad --> glcr + (3) h + nadh	Ascorbate and Aldarate Metabolism	Mitochondria	1.2.1.3	Irreversible
DNAMTn	DNA (cytosine-5-)-methyltransferase, nucleus	[n] : amet + dna --> ahcys + dna5mtc + h	Methionine Metabolism	Nucleus	2.1.1.37	Irreversible
GULNDer	gulonate dehydrogenase, endoplasmic reticulum	[r] : glcur + h + nadph <==> guln + nadp	Pentose and Glucuronate Interconversions	Endoplasmic Reticulum	1.1.1.19	Reversible
GLNLASEer	gluconolactonase, endoplasmic reticulum	[r] : guln + h <==> gullac + h2o	Ascorbate and Aldarate Metabolism	Endoplasmic Reticulum	3.1.1.17	Reversible
ASCBOX	ascorbic acid oxidase	[c] : ascb-L + (2) h + (2) o2s --> dhdascb + (2) h2o2	Ascorbate and Aldarate Metabolism	Cytosol		Irreversible
GTHDH	Glutathione dehydrogenase (dehydroascorbate reductase)	[c] : dhdascb + (2) gthrd --> ascb-L + gthox	Ascorbate and Aldarate Metabolism	Cytosol	1.8.5.1	Irreversible
DASCBR	dehydroascorbate reductase	[c] : dhdascb + h + nadph --> ascb-L + nadp	Ascorbate and Aldarate Metabolism	Cytosol	1.6.5.4	Irreversible
DASCBH	L-Dehydroascorbate lactonohydrolase	[c] : dhdascb + h2o --> 23doguln + h	Ascorbate and Aldarate Metabolism	Cytosol	3.1.1.17	Irreversible
DOGULND1	2,3-dioxo-L-gulonate decarboxylase (L-lyxonate-forming)	[c] : 23doguln + h2o --> co2 + lyxnt	Ascorbate and Aldarate Metabolism	Cytosol		Irreversible
DOGULND2	2,3-dioxo-L-gulonate decarboxylase (L-xylonate-forming)	[c] : 23doguln + h2o --> co2 + xylnt	Ascorbate and Aldarate Metabolism	Cytosol		Irreversible
ALOX15	Arachidonate 15-lipoxygenase	[c] : arachd + o2 --> 15HPET	Eicosanoid Metabolism	Cytosol	1.13.11.33	Irreversible
DOGULNO1	2,3-dioxo-L-gulonate:hydrogen peroxide oxireductase	[c] : 23doguln + h2o2 --> (2) h + oxa + thrnt	Ascorbate and Aldarate Metabolism	Cytosol		Irreversible
DOGULNO2	2,3-dioxo-L-gulonate:hydrogen peroxide oxireductase	[c] : 23doguln + h2o --> eryth + h + oxa	Ascorbate and Aldarate Metabolism	Cytosol		Irreversible
CYTK1n	cytidylate kinase (CMP),nuclear	[n] : atp + cmp <==> adp + cdp	Nucleotides	Nucleus	2.7.4.14	Reversible
CYTK2n	cytidylate kinase (dCMP),nuclear	[n] : atp + dcmp <==> adp + dcdp	Nucleotides	Nucleus	2.7.4.14	Reversible
UMPK2n	UMP kinase (CTP),nuclear	[n] : ctp + ump <==> cdp + udp	Nucleotides	Nucleus	2.7.4.14	Reversible
UMPK2	UMP kinase (CTP)	[c] : ctp + ump <==> cdp + udp	Nucleotides	Cytosol	2.7.4.14	Reversible
CYTK3n	cytidylate kinase (dCMP,CTP),nuclear	[n] : ctp + dcmp <==> cdp + dcdp	Nucleotides	Nucleus	2.7.4.14	Reversible
UMPK3n	UMP kinase (UTP),nuclear	[n] : ump + utp <==> (2) udp	Nucleotides	Nucleus	2.7.4.14	Reversible
UMPK3	UMP kinase (UTP)	[c] : ump + utp <==> (2) udp	Nucleotides	Cytosol	2.7.4.14	Reversible
UMPK4	UMP kinase (GTP)	[c] : gtp + ump <==> gdp + udp	Nucleotides	Cytosol	2.7.4.14	Reversible
UMPK4n	UMP kinase (GTP),nuclear	[n] : gtp + ump <==> gdp + udp	Nucleotides	Nucleus	2.7.4.14	Reversible
UMPK5n	UMP kinase (dATP),nuclear	[n] : datp + ump <==> dadp + udp	Nucleotides	Nucleus	2.7.4.14	Reversible
UMPK5	UMP kinase (dATP)	[c] : datp + ump <==> dadp + udp	Nucleotides	Cytosol	2.7.4.14	Reversible
UMPK6n	UMP kinase (dCTP),nuclear	[n] : dctp + ump <==> dcdp + udp	Nucleotides	Nucleus	2.7.4.14	Reversible
UMPK6	UMP kinase (dCTP)	[c] : dctp + ump <==> dcdp + udp	Nucleotides	Cytosol	2.7.4.14	Reversible
UMPK7	UMP kinase (dGTP)	[c] : dgtp + ump <==> dgdp + udp	Nucleotides	Cytosol	2.7.4.14	Reversible
UMPK7n	UMP kinase (dGTP),nuclear	[n] : dgtp + ump <==> dgdp + udp	Nucleotides	Nucleus	2.7.4.14	Reversible
CYTK4n	cytidylate kinase (dCMP,GTP),nuclear	[n] : dcmp + gtp <==> dcdp + gdp	Nucleotides	Nucleus	2.7.4.14	Reversible
CYTK5	cytidylate kinase (dCMP)	[c] : ctp + dcmp <==> cdp + dcdp	Nucleotides	Cytosol	2.7.4.14	Reversible
GLYOp	glycine oxidase, perixosomal	[x] : gly + h2o + o2 --> glx + h2o2 + nh4	Glycine, Serine, and Threonine Metabolism	Peroxisome		Irreversible
CYTK5n	cytidylate kinase (CMP),nuclear	[n] : cmp + gtp <==> cdp + gdp	Nucleotides	Nucleus	2.7.4.14	Reversible
CYTK6n	cytidylate kinase (CMP,CTP),nuclear	[n] : cmp + ctp <==> (2) cdp	Nucleotides	Nucleus	2.7.4.14	Reversible
CYTK6	cytidylate kinase (CMP,CTP)	[c] : cmp + ctp <==> (2) cdp	Nucleotides	Cytosol	2.7.4.14	Reversible
CYTK7	cytidylate kinase (CMP,UTP)	[c] : cmp + utp <==> cdp + udp	Nucleotides	Cytosol	2.7.4.14	Reversible
CYTK7n	cytidylate kinase (CMP,UTP),nuclear	[n] : cmp + utp <==> cdp + udp	Nucleotides	Nucleus	2.7.4.14	Reversible
CYTK8	cytidylate kinase (CMP,dATP)	[c] : cmp + datp <==> cdp + dadp	Nucleotides	Cytosol	2.7.4.14	Reversible
CYTK8n	cytidylate kinase (CMP,dATP),nuclear	[n] : cmp + datp <==> cdp + dadp	Nucleotides	Nucleus	2.7.4.14	Reversible
CYTK9	cytidylate kinase (CMP,dCTP)	[c] : cmp + dctp <==> cdp + dcdp	Nucleotides	Cytosol	2.7.4.14	Reversible
CYTK9n	cytidylate kinase (CMP,dCTP),nuclear	[n] : cmp + dctp <==> cdp + dcdp	Nucleotides	Nucleus	2.7.4.14	Reversible
CYTK10	cytidylate kinase (CMP,dGTP)	[c] : cmp + dgtp <==> cdp + dgdp	Nucleotides	Cytosol	2.7.4.14	Reversible
CYTK10n	cytidylate kinase (CMP,dGTP),nuclear	[n] : cmp + dgtp <==> cdp + dgdp	Nucleotides	Nucleus	2.7.4.14	Reversible
CYTK11	cytidylate kinase (dCMP,dGTP)	[c] : dcmp + dgtp <==> dcdp + dgdp	Nucleotides	Cytosol	2.7.4.14	Reversible
CYTK11n	cytidylate kinase (dCMP,dGTP),nuclear	[n] : dcmp + dgtp <==> dcdp + dgdp	Nucleotides	Nucleus	2.7.4.14	Reversible
DPROOp	D-proline oxidase, perixosomal	[x] : o2 + pro-D --> 1p2cbxl + h + h2o2	Arginine and Proline Metabolism	Peroxisome		Irreversible
CYTK12	cytidylate kinase (dCMP,dCTP)	[c] : dcmp + dctp <==> (2) dcdp	Nucleotides	Cytosol	2.7.4.14	Reversible
CYTK12n	cytidylate kinase (dCMP,dCTP),nuclear	[n] : dcmp + dctp <==> (2) dcdp	Nucleotides	Nucleus	2.7.4.14	Reversible
CYTK13	cytidylate kinase (dCMP,dATP)	[c] : datp + dcmp <==> dadp + dcdp	Nucleotides	Cytosol	2.7.4.14	Reversible
CYTK13n	cytidylate kinase (dCMP,dATP),nuclear	[n] : datp + dcmp <==> dadp + dcdp	Nucleotides	Nucleus	2.7.4.14	Reversible
CYTK14	cytidylate kinase (dCMP,UTP)	[c] : dcmp + utp <==> dcdp + udp	Nucleotides	Cytosol	2.7.4.14	Reversible
CYTK14n	cytidylate kinase (dCMP,CTP),nuclear	[n] : dcmp + utp <==> dcdp + udp	Nucleotides	Nucleus	2.7.4.14	Reversible
GLRASE	glucuronolactone reductase	[c] : gullac + nadp <==> glac + h + nadph	Ascorbate and Aldarate Metabolism	Cytosol	1.1.1.20	Reversible
FACOAL1812	fatty-acid--CoA ligase	[c] : atp + coa + vacc <==> amp + ppi + vacccoa	Fatty acid activation	Cytosol	6.2.1.3	Reversible
FACOAL1813	fatty-acid--CoA ligase	[c] : atp + coa + elaid <==> amp + od2coa + ppi	Fatty acid activation	Cytosol	6.2.1.3	Reversible
UROLACer	uronolactonase, endoplasmic reticulum	[r] : glcur + h <==> glac + h2o	Ascorbate and Aldarate Metabolism	Endoplasmic Reticulum	3.1.1.19	Reversible
FACOAL1822	fatty-acid--CoA ligase	[c] : atp + coa + lneldc <==> amp + lneldccoa + ppi	Fatty acid activation	Cytosol	6.2.1.3	Reversible
FACOAL200	fatty-acid--CoA ligase	[c] : arach + atp + coa <==> amp + arachcoa + ppi	Fatty acid activation	Cytosol	6.2.1.3	Reversible
FACOAL224	fatty-acid--CoA ligase	[c] : adrn + atp + coa <==> adrncoa + amp + ppi	Fatty acid activation	Cytosol	6.2.1.3	Reversible
FACOAL241	fatty-acid--CoA ligase	[c] : atp + coa + nrvnc <==> amp + nrvnccoa + ppi	Fatty acid activation	Cytosol	6.2.1.3	Reversible
FACOAL260	fatty-acid--CoA ligase (n-C26:0)	[c] : atp + coa + hexc <==> amp + hexccoa + ppi	Fatty acid activation	Cytosol	6.2.1.3	Reversible
FACOAL2251	fatty-acid--CoA ligase	[c] : atp + coa + dcsptn1 <==> amp + dcsptn1coa + ppi	Fatty acid activation	Cytosol	6.2.1.3	Reversible
FACOAL2252	fatty-acid--CoA ligase	[c] : atp + clpnd + coa <==> amp + clpndcoa + ppi	Fatty acid activation	Cytosol	6.2.1.3	Reversible
FACOAL240	fatty-acid--CoA ligase	[c] : atp + coa + lgnc <==> amp + lgnccoa + ppi	Fatty acid activation	Cytosol	6.2.1.3	Reversible
FACOAL203	fatty-acid--CoA ligase	[c] : atp + coa + dlnlcg <==> amp + dlnlcgcoa + ppi	Fatty acid activation	Cytosol	6.2.1.3	Reversible
FACOAL205	fatty-acid--CoA ligase	[c] : atp + coa + tmndnc <==> amp + ppi + tmndnccoa	Fatty acid activation	Cytosol	6.2.1.3	Reversible
FACOAL184	fatty-acid--CoA ligase	[c] : atp + coa + strdnc <==> amp + ppi + strdnccoa	Fatty acid activation	Cytosol	6.2.1.3	Reversible
FACOAL1831	fatty-acid--CoA ligase	[c] : atp + coa + lnlncg <==> amp + lnlncgcoa + ppi	Fatty acid activation	Cytosol	6.2.1.3	Reversible
FACOAL1832	fatty-acid--CoA ligase	[c] : atp + coa + lnlnca <==> amp + lnlncacoa + ppi	Fatty acid activation	Cytosol	6.2.1.3	Reversible
ACOAD8m	acyl-CoA dehydrogenase (isovaleryl-CoA), mitochondrial	[m] : fad + ivcoa --> 3mb2coa + fadh2	Valine, Leucine, and Isoleucine Metabolism	Mitochondria	1.3.99.10	Irreversible
DESAT16_2	palmitoyl-CoA desaturase (n-C16:0CoA -> n-C16:1CoA)	[c] : h + nadh + o2 + pmtcoa --> (2) h2o + hdcoa + nad	Fatty acid elongation	Cytosol	1.14.19.1	Irreversible
DESAT18_3	stearoyl-CoA desaturase (n-C18:0CoA -> n-C18:1CoA)	[c] : h + nadh + o2 + stcoa --> (2) h2o + nad + odecoa	Fatty acid elongation	Cytosol	1.14.19.1	Irreversible
DESAT18_4	stearoyl-CoA desaturase (n-C18:0CoA -> n-C18:1CoA)	[c] : h + nadh + o2 + stcoa --> (2) h2o + nad + vacccoa	Fatty acid elongation	Cytosol	1.14.19.1	Irreversible
DESAT18_5	stearoyl-CoA desaturase (n-C18:0CoA -> n-C18:1CoA)	[c] : h + nadh + o2 + stcoa --> (2) h2o + nad + od2coa	Fatty acid elongation	Cytosol	1.14.19.1	Irreversible
DESAT18_6	fatty acyl-CoA desaturase (n-C18:1CoA -> n-C18:2CoA)	[c] : h + nadh + o2 + odecoa --> (2) h2o + lneldccoa + nad	Fatty acid elongation	Cytosol	1.14.19.1	Irreversible
DESAT18_7	fatty acyl-CoA desaturase (n-C18:1CoA -> n-C18:2CoA)	[c] : h + nadh + o2 + vacccoa --> (2) h2o + lneldccoa + nad	Fatty acid elongation	Cytosol	1.14.19.1	Irreversible
DESAT18_8	fatty acyl-CoA desaturase (n-C18:1CoA -> n-C18:2CoA)	[c] : h + nadh + o2 + od2coa --> (2) h2o + lneldccoa + nad	Fatty acid elongation	Cytosol	1.14.19.1	Irreversible
DESAT18_10	fatty acyl-CoA desaturase (n-C18:2CoA -> n-C18:3CoA)	[c] : h + lnlncacoa + nadh + o2 --> (2) h2o + nad + strdnccoa	Fatty acid elongation	Cytosol	1.14.19.1	Irreversible
DESAT18_9	fatty acyl-CoA desaturase (n-C18:2CoA -> n-C18:3CoA)	[c] : h + lnlccoa + nadh + o2 --> (2) h2o + lnlncgcoa + nad	Fatty acid elongation	Cytosol	1.14.19.1	Irreversible
DESAT20_1	fatty acyl-CoA desaturase (n-C20:3CoA -> n-C20:4CoA)	[c] : dlnlcgcoa + h + nadh + o2 --> arachdcoa + (2) h2o + nad	Fatty acid elongation	Cytosol	1.14.19.1	Irreversible
FACOAL204	fatty-acid--CoA ligase	[c] : arachd + atp + coa <==> amp + arachdcoa + ppi	Fatty acid activation	Cytosol	6.2.1.3	Reversible
FACOAL2042	fatty-acid--CoA ligase	[c] : atp + coa + eicostet <==> amp + eicostetcoa + ppi	Fatty acid activation	Cytosol	6.2.1.3	Reversible
DESAT20_2	fatty acyl-CoA desaturase (n-C20:4CoA -> n-C20:5CoA)	[c] : eicostetcoa + h + nadh + o2 --> (2) h2o + nad + tmndnccoa	Fatty acid elongation	Cytosol	1.14.19.1	Irreversible
FACOAL245_1	fatty-acid--CoA ligase	[c] : atp + coa + tetpent6 <==> amp + ppi + tetpent6coa	Fatty acid activation	Cytosol	6.2.1.3	Reversible
FACOAL245_2	fatty-acid--CoA ligase	[c] : atp + coa + tetpent3 <==> amp + ppi + tetpent3coa	Fatty acid activation	Cytosol	6.2.1.3	Reversible
FACOAL244_1	fatty-acid--CoA ligase	[c] : atp + coa + tettet6 <==> amp + ppi + tettet6coa	Fatty acid activation	Cytosol	6.2.1.3	Reversible
FACOAL246_1	fatty-acid--CoA ligase	[c] : atp + coa + tethex3 <==> amp + ppi + tethex3coa	Fatty acid activation	Cytosol	6.2.1.3	Reversible
DESAT22_1p	fatty acyl-CoA desaturase (n-C22:4CoA -> n-C22:5CoA)	[x] : adrncoa + h + nadh + o2 --> dcsptn1coa + (2) h2o + nad	Fatty acid elongation	Peroxisome	1.14.19.1	Irreversible
NTD1m	5'-nucleotidase (dUMP),mitochondrial	[m] : dump + h2o --> duri + pi	Nucleotides	Mitochondria	3.1.3.5	Irreversible
NTD5m	5'-nucleotidase (dTMP), mitochondrial	[m] : dtmp + h2o --> pi + thymd	Nucleotides	Mitochondria	3.1.3.5	Irreversible
NTD2m	5'-nucleotidase (UMP), mitochondrial	[m] : h2o + ump --> pi + uri	Nucleotides	Mitochondria	3.1.3.5	Irreversible
HIBDm	3-hydroxyisobutyrate dehydrogenase, mitochondrial	[m] : 3hmp + nad <==> 2mop + h + nadh	Valine, Leucine, and Isoleucine Metabolism	Mitochondria	1.1.1.31	Reversible
NTD12	5'-nucleotidase (dIMP)	[c] : dimp + h2o --> din + pi	Nucleotides	Cytosol	3.1.3.5	Irreversible
MCCCrm	methylcrotonoyl-CoA carboxylase, mitochondrial	[m] : 3mb2coa + atp + hco3 <==> 3mgcoa + adp + h + pi	Valine, Leucine, and Isoleucine Metabolism	Mitochondria	6.4.1.4	Reversible
ACOAD1fm	acyl-CoA dehydrogenase (butanoyl-CoA), mitochondrial	[m] : btcoa + fad --> b2coa + fadh2	Butanoate Metabolism	Mitochondria	1.3.99.2	Irreversible
PPAP	phosphatidic acid phosphatase	[c] : h2o + pa_hs --> dag_hs + pi	Triacylglycerol Synthesis	Cytosol	3.1.3.4	Irreversible
GLXO1	glyoxylate oxidase	[c] : glx + h2o + nad --> (2) h + nadh + oxa	Glyoxylate and Dicarboxylate Metabolism	Cytosol	1.2.3.5	Irreversible
GLYCTO1p	Glycolate oxidase, peroxisome	[x] : glyclt + o2 --> glx + h2o2	Glyoxylate and Dicarboxylate Metabolism	Peroxisome		Irreversible
BTND1	biotinidase (biotin)	[c] : biocyt + h2o --> btn + lys-L	Biotin Metabolism	Cytosol	3.5.1.12	Irreversible
BACCLm	biotin-[acetyl-CoA-carboxylase] ligase, mitochondrial	[m] : atp + btn + h --> btamp + ppi	Biotin Metabolism	Mitochondria	6.3.4.15	Irreversible
HPYRR2x	hydroxypyruvate reductase (NADH)	[c] : h + hpyr + nadh --> glyc-S + nad	Glyoxylate and Dicarboxylate Metabolism	Cytosol		Irreversible
NNMT	Nicotinamide N-methyltransferase	[c] : amet + ncam --> 1mncam + ahcys	NAD Metabolism	Cytosol	2.1.1.1	Irreversible
NMNATr	nicotinamide-nucleotide adenylyltransferase	[c] : atp + h + nmn <==> nad + ppi	NAD Metabolism	Cytosol	2.7.7.1	Reversible
HPYRDC	hydroxypyruvate decarboxylase	[c] : h + hpyr --> co2 + gcald	Glyoxylate and Dicarboxylate Metabolism	Cytosol	4.1.1.40	Irreversible
GCALDDm	Glycolaldehyde dehydrogenase, mitochondrial	[m] : gcald + h2o + nad --> glyclt + (2) h + nadh	Glyoxylate and Dicarboxylate Metabolism	Mitochondria	1.2.1.21	Irreversible
MTHFD2m	methylenetetrahydrofolate dehydrogenase (NAD), mitochondrial	[m] : mlthf + nad <==> methf + nadh	Folate Metabolism	Mitochondria	1.5.1.5	Reversible
MTHFD2	methylenetetrahydrofolate dehydrogenase (NAD)	[c] : mlthf + nad <==> methf + nadh	Folate Metabolism	Cytosol	1.5.1.5	Reversible
13DAMPPOX	1,3-Diaminopropane:oxygen oxidoreductase (deaminating)	[c] : 13dampp + h2o + o2 --> bamppald + h2o2 + nh4	beta-Alanine metabolism	Cytosol	1.4.3.6	Irreversible
HISTASE	Histaminase	[c] : h2o + hista + o2 --> h2o2 + im4act + nh4	Histidine Metabolism	Cytosol	1.4.3.6	Irreversible
CEPTC	choline phosphotransferase	[c] : cdpchol + dag_hs --> cmp + h + pchol_hs	Glycerophospholipid Metabolism	Cytosol		Irreversible
CEPTE	ethanolamine phosphotransferase	[c] : cdpea + dag_hs --> cmp + h + pe_hs	Glycerophospholipid Metabolism	Cytosol		Irreversible
PSSA2_hs	Phosphatidylserine synthase homo sapiens	[c] : pe_hs + ser-L <==> etha + ps_hs	Glycerophospholipid Metabolism	Cytosol	2.7.8.8	Reversible
PSSA1_hs	Phosphatidylserine synthase homo sapiens	[c] : pchol_hs + ser-L <==> chol + ps_hs	Glycerophospholipid Metabolism	Cytosol	2.7.8.8	Reversible
TYRDOPO	Tyrosine:dopa oxidase	[c] : o2 + (2) tyr-L --> (2) 34dhphe	Tyrosine metabolism	Cytosol	1.14.18.1	Irreversible
TYRDOPO3	Tyrosine:dopa oxidase (dopaquinone producing 2)	[c] : (2) 34dhphe + o2 --> (2) dopaqn + (2) h2o	Tyrosine metabolism	Cytosol	1.14.18.1	Irreversible
DOPAQNISO1	Dopaquinone isomerase 1	[c] : dopaqn <==> 2c23dh56dhoxin + h	Tyrosine metabolism	Cytosol		Reversible
DOPACHRMISO	L-dopachrome isomerase 1	[c] : (2) 2c23dh56dhoxin + o2 --> (2) L-dpchrm + (2) h2o	Tyrosine metabolism	Cytosol		Irreversible
CDS	phosphatidate cytidylyltransferase	[c] : ctp + h + pa_hs --> cdpdag_hs + ppi	Glycerophospholipid Metabolism	Cytosol	2.7.7.41	Irreversible
CDSm	phosphatidate cytidylyltransferase	[m] : ctp + h + pa_hs --> cdpdag_hs + ppi	Glycerophospholipid Metabolism	Mitochondria	2.7.7.41	Irreversible
ACGAM6PSi	N-acetylglucosamine-6-phosphate synthase	[c] : accoa + gam6p --> acgam6p + coa + h	Aminosugar Metabolism	Cytosol	2.3.1.4	Irreversible
UAG2EMAi	UDP-N-acetyl-D-glucosamine 2-epimerase (Hydrolysis)	[c] : h2o + uacgam --> acmana + h + udp	Aminosugar Metabolism	Cytosol	5.1.3.14	Irreversible
ACNAM9PL	N-Acetylneuraminate 9-phosphate pyruvate-lyase (pyruvate-phosphorylating)	[c] : acmanap + h2o + pep --> acnamp + pi	Aminosugar Metabolism	Cytosol		Irreversible
ACNAM9PL2	N-Acetylneuraminate 9-phosphate pyruvate-lyase (pyruvate-phosphorylating)	[c] : h2o + man6p + pep --> kdnp + pi	Aminosugar Metabolism	Cytosol		Irreversible
PTRCOX1	Putrescine:oxygen oxidoreductase (deaminating)	[c] : h2o + o2 + ptrc --> 4abutn + h2o2 + nh4	Arginine and Proline Metabolism	Cytosol	1.4.3.6	Irreversible
ACNMLr	N-Acetylneuraminate lyase (reversible)	[c] : acnam <==> acmana + pyr	Aminosugar Metabolism	Cytosol	4.1.3.3	Reversible
CMPSAS	CMP sialic acid synthase	[c] : acnam + ctp --> cmpacna + ppi	Aminosugar Metabolism	Cytosol	2.7.7.43	Irreversible
CMPSASn	CMP sialic acid synthase, nuclear	[n] : acnam + ctp --> cmpacna + ppi	Aminosugar Metabolism	Nucleus	2.7.7.43	Irreversible
NABTNOm	N4-Acetylaminobutanal:NAD+ oxidoreductase (m)	[m] : h2o + n4abutn + nad --> 4aabutn + (2) h + nadh	Arginine and Proline Metabolism	Mitochondria	1.2.1.3	Irreversible
PTRCAT1	Putrescine acetyltransferase	[c] : accoa + ptrc --> aprut + coa + h	Arginine and Proline Metabolism	Cytosol	2.3.1.57	Irreversible
ACGAM2E	N-acetylglucosamine 2-epimerase	[c] : acgam <==> acmana	Aminosugar Metabolism	Cytosol	5.1.3.8	Reversible
ACNAMPH	N-Acetylneuraminate 9-phosphate phosphohydrolase	[c] : acnamp + h2o --> acnam + pi	Aminosugar Metabolism	Cytosol	3.1.3.29	Irreversible
KDNH	2-keto-3deoxy-D-glycero-D-galactononic acid phosphohydrolase	[c] : h2o + kdnp --> kdn + pi	Aminosugar Metabolism	Cytosol		Irreversible
ACGALK	N-acetylgalactosamine kinase	[c] : acgal + atp --> acgal1p + adp + h	Aminosugar Metabolism	Cytosol		Irreversible
ACGALK2	N-acetylgalactosamine kinase (ITP)	[c] : acgal + itp --> acgal1p + h + idp	Aminosugar Metabolism	Cytosol		Irreversible
UAGALDP	UDP-N-acetylgalactosamine diphosphorylase	[c] : acgal1p + h + utp --> ppi + udpacgal	Aminosugar Metabolism	Cytosol		Irreversible
2HBO	2-Hydroxybutyrate:NAD+ oxidoreductase	[c] : 2hb + nad <==> 2obut + h + nadh	Propanoate Metabolism	Cytosol	1.1.1.27	Reversible
PPCOAOm	Propanoyl-CoA:FAD 2,3-oxidoreductase, mitochondrial	[m] : fad + ppcoa --> fadh2 + prpncoa	Propanoate Metabolism	Mitochondria	1.3.99.3	Irreversible
3HPPD	3-hydroxypropionate dehydrogenase	[c] : 3hpp + nad <==> h + msa + nadh	Propanoate Metabolism	Cytosol	1.1.1.59	Reversible
AACOAT	Acetoacetyl-CoA:acetate CoA-transferase	[c] : acac + atp + coa <==> aacoa + amp + ppi	Propanoate Metabolism	Cytosol	6.2.1.16	Reversible
ADCim	Acetoacetate decarboxylation (irreversible), mitochondrial	[m] : acac + h --> acetone + co2	Propanoate Metabolism	Mitochondria	4.1.1.4	Irreversible
PI4P5K	phosphatidylinositol 4-phosphate 5-kinase	[c] : atp + pail4p_hs --> adp + h + pail45p_hs	Glycerophospholipid Metabolism	Cytosol	2.7.1.68	Irreversible
PIK4	phosphatidylinositol 4-kinase	[c] : atp + pail_hs --> adp + h + pail4p_hs	Glycerophospholipid Metabolism	Cytosol	2.7.1.67	Irreversible
FACOAL40im	fatty-acid--CoA ligase (butanoate), mitochondrial	[m] : atp + but + coa --> amp + btcoa + ppi	Fatty acid activation	Mitochondria	6.2.1.2	Irreversible
3HBCDm	3-hydroxybutyryl-CoA dehydratase, mitochondrial	[m] : b2coa + h2o <==> 3hbcoa-R	Butanoate Metabolism	Mitochondria	4.2.1.55	Reversible
AGPSx	alkylglycerone phosphate synthase	[x] : adhap_hs + alkylR1oh --> Rtotal + akdhap_hs + h	Glycerophospholipid Metabolism	Peroxisome	2.5.1.26	Irreversible
AGPex	alkyl glycerol phosphate transport	akdhap_hs[c] <==> akdhap_hs[x]	Transport, Peroxisomal	Cytosol, Peroxisome		Reversible
AGLPR	alkyl glycerol phosphate reductase	[c] : akdhap_hs + h + nadph --> akgp_hs + nadp	Glycerophospholipid Metabolism	Cytosol		Irreversible
AGLPT	alkyl glycerol phosphate acyltransferase	[c] : Rtotal2 + akgp_hs + h --> ak2gp_hs + h2o	Glycerophospholipid Metabolism	Cytosol		Irreversible
AGLPH	alkyl glycerol phosphate hydrolase	[c] : ak2gp_hs + h2o --> ak2g_hs + pi	Glycerophospholipid Metabolism	Cytosol		Irreversible
AGLPED	alkyl acyl glycerophosphoethanolamine desaturase	[c] : ak2gpe_hs + h + nadph + o2 --> dak2gpe_hs + (2) h2o + nadp	Glycerophospholipid Metabolism	Cytosol		Irreversible
AGLPC	alkyl acylglycerol phosphocholine transferase	[c] : ak2g_hs + cdpchol --> ak2gchol_hs + cmp + h + h2o	Glycerophospholipid Metabolism	Cytosol		Irreversible
PLA2	phospholipase A2	[c] : ak2gchol_hs + h2o --> Rtotal2 + ak2lgchol_hs + h	Glycerophospholipid Metabolism	Cytosol		Irreversible
PAFS	alkyl glycerol phosphocholine acetyl transferase	[c] : accoa + ak2lgchol_hs --> coa + paf_hs	Glycerophospholipid Metabolism	Cytosol		Irreversible
MECOALm	mesaconate--CoA ligase (ADP-forming), mitochondrial	[m] : atp + coa + mescon <==> adp + mescoa + pi	C5-Branched dibasic acid metabolism	Mitochondria	6.2.1.5	Reversible
MECOAS1m	mesaconate--CoA ligase (GDP-forming)	[m] : coa + gtp + mescon <==> gdp + mescoa + pi	C5-Branched dibasic acid metabolism	Mitochondria	6.2.1.4	Reversible
CITMCOAHm	L-Citramalyl-CoA hydro-lyase, mitochondrial	[m] : h2o + itaccoa <==> citmcoa-L	C5-Branched dibasic acid metabolism	Mitochondria	4.2.1.56	Reversible
CITMCOALm	L-Citramalyl-CoA pyruvate-lyase	[m] : citmcoa-L --> accoa + pyr	C5-Branched dibasic acid metabolism	Mitochondria	4.1.3.25	Irreversible
MGACONm	methylglutaconase, mitochondrial	[m] : citmcoa-L <==> h2o + mescoa	C5-Branched dibasic acid metabolism	Mitochondria		Reversible
MESCOALm	Mesaconyl-CoA pyruvate-lyase	[m] : h2o + mescoa --> accoa + pyr	C5-Branched dibasic acid metabolism	Mitochondria	4.1.3.25	Irreversible
MMSAD3m	methylmalonate-semialdehyde dehydrogenase (malonic semialdehyde), mitochondrial	[m] : coa + msa + nad --> accoa + co2 + nadh	Propanoate Metabolism	Mitochondria	1.2.1.27	Irreversible
PLA2_2	phospholipase A2	[c] : h2o + pchol_hs --> Rtotal2 + h + lpchol_hs	Glycerophospholipid Metabolism	Cytosol	3.1.1.4	Irreversible
LPASE	lysophospholipase	[c] : h2o + lpchol_hs --> Rtotal + g3pc + h	Glycerophospholipid Metabolism	Cytosol		Irreversible
PGPPT	phosphatidyl-CMP: glycerophosphate phosphatidyltransferase	[c] : cdpdag_hs + glyc3p --> cmp + h + pgp_hs	Glycerophospholipid Metabolism	Cytosol	2.7.8.11	Irreversible
PGPP_hs	Phosphatidylglycerol phosphate phosphatase (homo sapiens)	[c] : h2o + pgp_hs --> pglyc_hs + pi	Glycerophospholipid Metabolism	Cytosol	3.1.3.27	Irreversible
CLS_hs	cardiolipin synthase (homo sapiens)	[c] : cdpdag_hs + pglyc_hs --> clpn_hs + cmp + h	Glycerophospholipid Metabolism	Cytosol		Irreversible
PI45P5P	phosphatidylinositol-4,5-bisphosphate 5-phosphatase	[c] : h2o + pail45p_hs --> pail4p_hs + pi	Inositol Phosphate Metabolism	Cytosol	3.1.3.36	Irreversible
DARGOp	D-arginine oxidase, perixosomal	[x] : arg-D + h2o + o2 --> 5g2oxpt + h2o2 + nh4	D-arg and D-orn metabolism	Peroxisome	1.4.3.3	Irreversible
DORNOp	D-ornithine oxidase, perixosomal	[x] : h2o + o2 + orn-D --> 5a2opntn + h2o2 + nh4	D-arg and D-orn metabolism	Peroxisome	1.4.3.3	Irreversible
LFORKYNHYD	L-Formylkynurenine hydrolase	[c] : Lfmkynr + h2o --> ala-L + h + nformanth	Tryptophan metabolism	Cytosol	3.7.1.3	Irreversible
SSALxm	succinate-semialdehyde dehydrogenase (NAD) reversible (mitochondrial)	[m] : h2o + nad + sucsal --> (2) h + nadh + succ	Glutamate metabolism	Mitochondria	1.2.1.24	Irreversible
AMPTASECG	alanyl aminopeptidase (cys-gly)	[c] : cgly + h2o --> cys-L + gly	Glutathione Metabolism	Cytosol	3.4.11.2	Irreversible
OPAHir	5-Oxoproline amidohydrolase (ATP-hydrolysing) (ir)	[c] : 5oxpro + atp + (2) h2o --> adp + glu-L + h + pi	Glutathione Metabolism	Cytosol	3.5.2.9	Irreversible
PI45P3K	phosphatidylinositol 4,5-bisphosphate 3-kinase	[c] : atp + pail45p_hs --> adp + h + pail345p_hs	Inositol Phosphate Metabolism	Cytosol	2.7.1.153	Irreversible
SACCD3m	saccharopine dehydrogenase (NADP, L-lysine forming), mitochondrial	[m] : akg + h + lys-L + nadph --> h2o + nadp + saccrp-L	Lysine Metabolism	Mitochondria	1.5.1.8	Irreversible
SACCD4m	saccharopine dehydrogenase (NAD, L-glutamate forming), mitochondrial	[m] : h2o + nadp + saccrp-L --> L2aadp6sa + glu-L + h + nadph	Lysine Metabolism	Mitochondria	1.5.1.10	Irreversible
AASAD3	L-aminoadipate-semialdehyde dehydrogenase (NADH)	[c] : L2aadp6sa + h2o + nad --> L2aadp + (2) h + nadh	Lysine Metabolism	Cytosol	1.2.1.31	Irreversible
AATAi	2-aminoadipate transaminase, irreversible	[c] : L2aadp + akg --> 2oxoadp + glu-L	Lysine Metabolism	Cytosol	2.6.1.39	Irreversible
PI345P3P	phosphatidylinositol-3,4,5-trisphosphate 3-phosphatase	[c] : h2o + pail345p_hs --> pail45p_hs + pi	Inositol Phosphate Metabolism	Cytosol	3.1.3.67	Irreversible
PI5P4K	phosphatidylinositol-5-phosphate 4-kinase	[c] : atp + pail5p_hs --> adp + h + pail45p_hs	Inositol Phosphate Metabolism	Cytosol	2.7.1.149	Irreversible
DHCRD1	dihydroceramide desaturase	[c] : dhcrm_hs + nadp --> crm_hs + h + nadph	Sphingolipid Metabolism	Cytosol		Irreversible
DHCRD2	dihydroceramide desaturase	[c] : dhcrm_hs + fad --> crm_hs + fadh2	Sphingolipid Metabolism	Cytosol		Irreversible
AAPSAS	AAPSAS	[c] : h + h2o + thp2c --> L2aadp6sa	Lysine Metabolism	Cytosol		Irreversible
DAGK_hs	Diacylglycerol phosphate kinase (homo sapiens)	[c] : atp + dag_hs <==> adp + h + pa_hs	Glycerophospholipid Metabolism	Cytosol	2.7.1.107	Reversible
DAGKn_hs	Diacylglycerol phosphate kinase (homo sapiens)	[n] : atp + dag_hs <==> adp + h + pa_hs	Glycerophospholipid Metabolism	Nucleus	2.7.1.107	Reversible
OIVD1m	2-oxoisovalerate dehydrogenase (acylating; 4-methyl-2-oxopentaoate), mitochondrial	[m] : 4mop + coa + nad --> co2 + ivcoa + nadh	Valine, Leucine, and Isoleucine Metabolism	Mitochondria	1.2.1.25	Irreversible
OIVD2m	2-oxoisovalerate dehydrogenase (acylating; 3-methyl-2-oxobutanoate), mitochondrial	[m] : 3mob + coa + nad --> co2 + ibcoa + nadh	Valine, Leucine, and Isoleucine Metabolism	Mitochondria	1.2.1.25	Irreversible
OIVD3m	2-oxoisovalerate dehydrogenase (acylating; 3-methyl-2-oxopentanoate), mitochondrial	[m] : 3mop + coa + nad --> 2mbcoa + co2 + nadh	Valine, Leucine, and Isoleucine Metabolism	Mitochondria	1.2.1.25	Irreversible
MGCHrm	methylglutaconyl-CoA hydratase (reversible), mitochondrial	[m] : 3mgcoa + h2o <==> hmgcoa	Valine, Leucine, and Isoleucine Metabolism	Mitochondria	4.2.1.18	Reversible
ECOAH12m	3-hydroxyacyl-CoA dehydratase (3-hydroxyisobutyryl-CoA) (mitochondria)	[m] : 2mp2coa + h2o <==> 3hibutcoa	Valine, Leucine, and Isoleucine Metabolism	Mitochondria	4.2.1.17	Reversible
3HBCOAHLm	3-hydroxyisobutyryl-CoA hydrolase, mitochondrial	[m] : 3hibutcoa + h2o --> 3hmp + coa + h	Valine, Leucine, and Isoleucine Metabolism	Mitochondria	3.1.2.4	Irreversible
ACOAD10m	acyl-CoA dehydrogenase (2-methylbutanoyl-CoA), mitochondrial	[m] : 2mbcoa + fad --> 2mb2coa + fadh2	Valine, Leucine, and Isoleucine Metabolism	Mitochondria	1.3.99.12	Irreversible
ACOAD9m	acyl-CoA dehydrogenase (isobutyryl-CoA), mitochondrial	[m] : fad + ibcoa --> 2mp2coa + fadh2	Valine, Leucine, and Isoleucine Metabolism	Mitochondria	1.3.99.12	Irreversible
ECOAH9m	2-Methylprop-2-enoyl-CoA (2-Methylbut-2-enoyl-CoA), mitochondrial	[m] : 2mb2coa + h2o <==> 3hmbcoa	Valine, Leucine, and Isoleucine Metabolism	Mitochondria	4.2.1.17	Reversible
HACD9m	3-hydroxyacyl-CoA dehydrogenase (2-Methylacetoacetyl-CoA), mitochondrial	[m] : 3hmbcoa + nad <==> 2maacoa + h + nadh	Valine, Leucine, and Isoleucine Metabolism	Mitochondria	1.1.1.35	Reversible
ACACT10m	acetyl-CoA C-acetyltransferase, mitochondrial	[m] : 2maacoa + coa <==> accoa + ppcoa	Valine, Leucine, and Isoleucine Metabolism	Mitochondria	2.3.1.9	Reversible
INOSTO	inositol oxygenase	[c] : inost + o2 --> glcur + h + h2o	Inositol Phosphate Metabolism	Cytosol	1.13.99.1	Irreversible
PI4PP	phosphatidylinositol-4-phosphate 4-phosphatase	[c] : h2o + pail4p_hs --> pail_hs + pi	Inositol Phosphate Metabolism	Cytosol		Irreversible
MI3PP	myo-inositol 3-phosphatase	[c] : h2o + mi3p-D --> inost + pi	Inositol Phosphate Metabolism	Cytosol	3.1.3.25	Irreversible
MI4PP	myo-inositol 4-phosphatase	[c] : h2o + mi4p-D --> inost + pi	Inositol Phosphate Metabolism	Cytosol	3.1.3.25	Irreversible
MI14PP	inositol-1,4-bisphosphate 1-phosphatase	[c] : h2o + mi14p --> mi4p-D + pi	Inositol Phosphate Metabolism	Cytosol	3.1.3.57	Irreversible
MI34PP	inositol-3,4-bisphosphate 4-phosphatase	[c] : h2o + mi34p --> mi3p-D + pi	Inositol Phosphate Metabolism	Cytosol	3.1.3.66	Irreversible
MI13PP	inositol-1,3-bisphosphate 3-phosphatase	[c] : h2o + mi13p --> mi1p-D + pi	Inositol Phosphate Metabolism	Cytosol	3.1.3.64	Irreversible
MI134PP	inositol-1,3,4-trisphosphate 1-phosphatase	[c] : h2o + mi134p --> mi34p + pi	Inositol Phosphate Metabolism	Cytosol	3.1.3.57	Irreversible
MI145PP	inositol-1,4,5-trisphosphate 5-phosphatase	[c] : h2o + mi145p --> mi14p + pi	Inositol Phosphate Metabolism	Cytosol	3.1.3.56	Irreversible
MI1345PP	inositol-1,3,4,5-trisphosphate 5-phosphatase	[c] : h2o + mi1345p --> mi134p + pi	Inositol Phosphate Metabolism	Cytosol	3.1.3.56	Irreversible
MI145PK	inositol-1,4,5-trisphosphate 3-kinase	[c] : atp + mi145p --> adp + h + mi1345p	Inositol Phosphate Metabolism	Cytosol	2.7.1.127	Irreversible
MI134PK	inositol-1,3,4-trisphosphate 6-kinase	[c] : atp + mi134p --> adp + h + mi1346p	Inositol Phosphate Metabolism	Cytosol	2.7.1.134	Irreversible
MI3456PK	inositol-3,4,5,6-tetrakisphosphate 1-kinase	[c] : atp + mi3456p --> adp + h + mi13456p	Inositol Phosphate Metabolism	Cytosol	2.7.1.134	Irreversible
MI13456PK	inositol-1,3,4,5,6-pentakisphosphate 2-kinase	[c] : atp + mi13456p --> adp + h + minohp	Inositol Phosphate Metabolism	Cytosol		Irreversible
CDIPTr	phosphatidylinositol synthase (Homo sapiens)	[c] : cdpdag_hs + inost <==> cmp + h + pail_hs	Glycerophospholipid Metabolism	Cytosol	2.7.8.11	Reversible
PYDXDH	pyridoxal dehydrogenase	[c] : h2o + o2 + pydx --> 4pyrdx + h2o2	Vitamin B6 Metabolism	Cytosol	1.2.3.1	Irreversible
BBHOX	4-Trimethylammoniobutanoate,2-oxoglutarate:oxygen oxidoreductase (3-hydroxylating)	[c] : 4tmeabutn + akg + o2 --> co2 + crn + succ	Lysine Metabolism	Cytosol		Irreversible
TMLYSOX	trimethyllysine dioxygenase	[c] : akg + o2 + tmlys --> 3htmelys + co2 + succ	Lysine Metabolism	Cytosol	1.14.11.8	Irreversible
TMABADH	4-trimethylaminobutyraldehyde dehydrogenase	[c] : 4tmeabut + h2o + nad --> 4tmeabutn + (2) h + nadh	Lysine Metabolism	Cytosol	1.2.1.47	Irreversible
MI1346PKn	inositol-1,3,4,6-tetrakisphosphate 5-kinase, nucleus	[n] : atp + mi1346p --> adp + h + mi13456p	Inositol Phosphate Metabolism	Nucleus	2.7.1.140	Irreversible
MI145P6Kn	inositol-1,4,5-triphosphate 6-kinase, nucleus	[n] : atp + mi145p --> adp + h + mi1456p	Inositol Phosphate Metabolism	Nucleus	2.7.1.151	Irreversible
MI145PKn	inositol-1,4,5-trisphosphate 3-kinase, nucleus	[n] : atp + mi145p --> adp + h + mi1345p	Inositol Phosphate Metabolism	Nucleus	2.7.1.127	Irreversible
MI1345PKn	inositol-1,3,4,5-triphosphate 6-kinase, nucleus	[n] : atp + mi1345p --> adp + h + mi13456p	Inositol Phosphate Metabolism	Nucleus		Irreversible
MI1456PKn	inositol-1,4,5,6- tetrakisphosphate 3-kinase, nucleus	[n] : atp + mi1456p --> adp + h + mi13456p	Inositol Phosphate Metabolism	Nucleus	2.7.1.151	Irreversible
PMI12346PH	5-diphosphoinositol-1,2,3,4,6-pentakisphosphate diphosphohydrolase	[c] : h2o + ppmi12346p --> h + minohp + pi	Inositol Phosphate Metabolism	Cytosol	3.6.1.52	Irreversible
PMI1346PH	diphosphoinositol-1,3,4,6-tetrakisphosphate diphosphohydrolase	[c] : h2o + ppmi1346p --> h + mi13456p + pi	Inositol Phosphate Metabolism	Cytosol		Irreversible
PMI1346PHn	diphosphoinositol-1,3,4,6-tetrakisphosphate diphosphohydrolase, nucleus	[n] : h2o + ppmi1346p --> h + mi13456p + pi	Inositol Phosphate Metabolism	Nucleus		Irreversible
PMI12346PHn	5-diphosphoinositol-1,2,3,4,6-pentakisphosphate diphosphohydrolase, nuclear	[n] : h2o + ppmi12346p --> h + minohp + pi	Inositol Phosphate Metabolism	Nucleus	3.6.1.52	Irreversible
PIK3	phosphatidylinositol 3-kinase	[c] : atp + pail_hs --> adp + h + pail3p_hs	Inositol Phosphate Metabolism	Cytosol	2.7.1.137	Irreversible
PI4P3K	phosphatidylinositol 4-phosphate 3-kinase	[c] : atp + pail4p_hs --> adp + h + pail34p_hs	Inositol Phosphate Metabolism	Cytosol		Irreversible
PI4P3Ker	phosphatidylinositol 4-phosphate 3-kinase, endoplasmic reticulum	[r] : atp + pail4p_hs --> adp + h + pail34p_hs	Inositol Phosphate Metabolism	Endoplasmic Reticulum		Irreversible
PIK3er	phosphatidylinositol 3-kinase, endoplasmic reticulum	[r] : atp + pail_hs --> adp + h + pail3p_hs	Inositol Phosphate Metabolism	Endoplasmic Reticulum	2.7.1.137	Irreversible
OBDHc	2-Oxobutanoate dehydrogenase, cytosolic	[c] : 2obut + coa + nad --> co2 + nadh + ppcoa	Glycine, Serine, and Threonine Metabolism	Cytosol	1.2.7.2	Irreversible
PI45PLC	phosphatidylinositol 4,5-bisphosphate phospholipase C	[c] : h2o + pail45p_hs --> dag_hs + h + mi145p	Inositol Phosphate Metabolism	Cytosol	3.1.4.11	Irreversible
PIPLC	phosphatidylinositol phospholipase C	[c] : h2o + pail_hs --> dag_hs + h + mi1p-D	Inositol Phosphate Metabolism	Cytosol	3.1.4.3	Irreversible
HYPTROX	Hypotaurine oxidase	[c] : (2) h + (2) hyptaur + o2 --> (2) taur	Taurine and hypotaurine metabolism	Cytosol		Irreversible
BCDO	beta-Carotene dioxygenase	[c] : caro + o2 --> (2) retinal	Vitamin A Metabolism	Cytosol	1.14.99.36	Irreversible
RDH1	retinol dehydrogenase (all-trans)	[c] : nad + retinol <==> h + nadh + retinal	Vitamin A Metabolism	Cytosol	1.1.1.105	Reversible
RDH2	retinol dehydrogenase (9-cis,NADH)	[c] : nad + retinol-9-cis <==> h + nadh + retinal-cis-9	Vitamin A Metabolism	Cytosol	1.1.1.105	Reversible
RDH3	retinol dehydrogenase (11-cis,NADH)	[c] : nad + retinol-cis-11 <==> h + nadh + retinal-11-cis	Vitamin A Metabolism	Cytosol	1.1.1.105	Reversible
RDH1a	retinol dehydrogenase (all-trans,NADPH)	[c] : nadp + retinol <==> h + nadph + retinal	Vitamin A Metabolism	Cytosol	1.1.1.105	Reversible
RDH2a	retinol dehydrogenase (9-cis,NADPH)	[c] : nadp + retinol-9-cis <==> h + nadph + retinal-cis-9	Vitamin A Metabolism	Cytosol	1.1.1.105	Reversible
RDH3a	retinol dehydrogenase (11-cis,NADPH)	[c] : nadp + retinol-cis-11 <==> h + nadph + retinal-11-cis	Vitamin A Metabolism	Cytosol	1.1.1.105	Reversible
PI4PLC	phosphatidylinositol 4-phosphate phospholipase C	[c] : h2o + pail4p_hs --> dag_hs + h + mi14p	Inositol Phosphate Metabolism	Cytosol		Irreversible
PIPLCn	phosphatidylinositol phospholipase C, nucleus	[n] : h2o + pail_hs --> dag_hs + h + mi1p-D	Inositol Phosphate Metabolism	Nucleus	3.1.4.3	Irreversible
PI4PLCn	phosphatidylinositol 4-phosphate phospholipase C, nucleus	[n] : h2o + pail4p_hs --> dag_hs + h + mi14p	Inositol Phosphate Metabolism	Nucleus		Irreversible
PI45PLCn	phosphatidylinositol 4,5-bisphosphate phospholipase C, nucleus	[n] : h2o + pail45p_hs --> dag_hs + h + mi145p	Inositol Phosphate Metabolism	Nucleus	3.1.4.11	Irreversible
PYAM5POr	pyridoxamine 5'-phosphate oxidase	[c] : h2o + o2 + pyam5p <==> h2o2 + nh4 + pydx5p	Vitamin B6 Metabolism	Cytosol	1.4.3.5	Reversible
LYSMTF1n	histone-lysine N-methyltransferase, nuclear	[n] : amet + peplys --> Nmelys + ahcys	Lysine Metabolism	Nucleus	2.1.1.43	Irreversible
LYSMTF2n	histone-lysine N-methyltransferase, nuclear	[n] : Nmelys + amet --> Ndmelys + ahcys	Lysine Metabolism	Nucleus	2.1.1.43	Irreversible
LYSMTF3n	histone-lysine N-methyltransferase, nuclear	[n] : Ndmelys + amet --> Ntmelys + ahcys	Lysine Metabolism	Nucleus	2.1.1.43	Irreversible
PYLALDOX	Perillyl aldehyde:NAD+ oxidoreductase	[c] : h2o + nad + pylald --> (2) h + nadh + peracd	Limonene and pinene degradation	Cytosol	1.2.1.3	Irreversible
PYLALDOXm	Perillyl aldehyde:NAD+ oxidoreductase (m)	[m] : h2o + nad + pylald --> (2) h + nadh + peracd	Limonene and pinene degradation	Mitochondria	1.2.1.3	Irreversible
C2M26DCOAHLm	cis-2-Methyl-5-isopropylhexa-2,5-dienoyl-CoA hydro-lyase (m)	[m] : c2m26dcoa + h2o <==> 3h26dm5coa	Limonene and pinene degradation	Mitochondria	4.2.1.17	Reversible
T2M26DCOAHLm	trans-2-Methyl-5-isopropylhexa-2,5-dienoyl-CoA hydro-lyase (m)	[m] : h2o + t2m26dcoa <==> 3h26dm5coa	Limonene and pinene degradation	Mitochondria	4.2.1.17	Reversible
MI134P4P	inositol-1,3,4-trisphosphate 4-phosphatase	[c] : h2o + mi134p --> mi13p + pi	Inositol Phosphate Metabolism	Cytosol		Irreversible
MI14P4P	inositol-1,4-bisphosphate 4-phosphatase	[c] : h2o + mi14p --> mi1p-D + pi	Inositol Phosphate Metabolism	Cytosol		Irreversible
PI3P4K	phosphatidylinositol 3-phosphate 4-kinase	[c] : atp + pail3p_hs --> adp + h + pail34p_hs	Inositol Phosphate Metabolism	Cytosol		Irreversible
PI34P5K	phosphatidylinositol 3,4-bisphosphate 5-kinase	[c] : atp + pail34p_hs --> adp + h + pail345p_hs	Inositol Phosphate Metabolism	Cytosol		Irreversible
PI345P5P	phosphatidylinositol-3,4,5-trisphosphate 5-phosphatase	[c] : h2o + pail345p_hs --> pail34p_hs + pi	Inositol Phosphate Metabolism	Cytosol		Irreversible
PIK5	phosphatidylinositol 5-kinase	[c] : atp + pail_hs --> adp + h + pail5p_hs	Inositol Phosphate Metabolism	Cytosol		Irreversible
PI5P3K	phosphatidylinositol-5-phosphate 3-kinase	[c] : atp + pail5p_hs --> adp + h + pail35p_hs	Inositol Phosphate Metabolism	Cytosol		Irreversible
PI3P5K	phosphatidylinositol 3-phosphate 5-kinase	[c] : atp + pail3p_hs --> adp + h + pail35p_hs	Inositol Phosphate Metabolism	Cytosol		Irreversible
C2M26DCOAHLx	cis-2-Methyl-5-isopropylhexa-2,5-dienoyl-CoA hydro-lyase (x)	[x] : c2m26dcoa + h2o <==> 3h26dm5coa	Limonene and pinene degradation	Peroxisome	4.2.1.17	Reversible
T2M26DCOAHLx	trans-2-Methyl-5-isopropylhexa-2,5-dienoyl-CoA hydro-lyase (x)	[x] : h2o + t2m26dcoa <==> 3h26dm5coa	Limonene and pinene degradation	Peroxisome	4.2.1.17	Reversible
PI5P3Ker	phosphatidylinositol-5-phosphate 3-kinase, endoplasmic reticulum	[r] : atp + pail5p_hs --> adp + h + pail35p_hs	Inositol Phosphate Metabolism	Endoplasmic Reticulum		Irreversible
PI45P4P	phosphatidylinositol-4,5-bisphosphate 4-phosphatase	[c] : h2o + pail45p_hs --> pail5p_hs + pi	Inositol Phosphate Metabolism	Cytosol		Irreversible
T4HCINNOX	4-Coumarate:oxygen oxidoreductase	[c] : (2) T4hcinnm + o2 --> (2) 34dhcinm	Stilbene, coumarine and lignin biosynthesis	Cytosol	1.14.18.1	Irreversible
PIACGT	phosphatidylinositol N-acetylglucosaminyltransferase	[c] : pail_hs + uacgam --> acgpail_hs + h + udp	Glycosylphosphatidylinositol (GPI)-anchor biosynthesis	Cytosol	2.4.1.198	Irreversible
BDG2HCGHD	beta-D-Glucosyl-2-coumarinate glucohydrolase	[c] : bdg2hc + h2o --> 2coum + glc-D + h	Stilbene, coumarine and lignin biosynthesis	Cytosol	3.2.1.21	Irreversible
ACGPID	N-acetylglucosaminylphosphatidylinositol deacetylase	[c] : acgpail_hs + h2o --> ac + gpail_hs	Glycosylphosphatidylinositol (GPI)-anchor biosynthesis	Cytosol	3.5.1.89	Irreversible
B3GNT31g	UDP-GlcNAc:betaGal beta-1,3-N-acetylglucosaminyltransferase 3, Golgi apparatus	[g] : thcrm_hs + udpgal --> galthcrm_hs + h + udp	Sphingolipid Metabolism	Golgi Apparatus		Irreversible
B3GNT32g	UDP-GlcNAc:betaGal beta-1,3-N-acetylglucosaminyltransferase 3, Golgi apparatus	[g] : galthcrm_hs + udpgal --> galgalthcrm_hs + h + udp	Sphingolipid Metabolism	Golgi Apparatus		Irreversible
B3GNT33g	UDP-GlcNAc:betaGal beta-1,3-N-acetylglucosaminyltransferase 3, Golgi apparatus	[g] : galgalthcrm_hs + udpgal --> galgalgalthcrm_hs + h + udp	Sphingolipid Metabolism	Golgi Apparatus		Irreversible
B3GNT35g	UDP-GlcNAc:betaGal beta-1,3-N-acetylglucosaminyltransferase 3, Golgi apparatus	[g] : acglcgalgbside_hs + udpgal --> galacglcgalgbside_hs + h + udp	Sphingolipid Metabolism	Golgi Apparatus		Irreversible
B3GNT36g	UDP-GlcNAc:betaGal beta-1,3-N-acetylglucosaminyltransferase 3, Golgi apparatus	[g] : acgal + gbside_hs --> acgbgbside_hs + h2o	Sphingolipid Metabolism	Golgi Apparatus		Irreversible
FUT11g	Galactoside 2-alpha-L-fucosyltransferase 1	[g] : galgbside_hs + gdpfuc --> fucgalgbside_hs + gdp + h	Sphingolipid Metabolism	Golgi Apparatus	2.4.1.69	Irreversible
A4GALTg	Lactosylceramide 4-alpha-galactosyltransferase	[g] : galgluside_hs + udpgal --> h + thcrm_hs + udp	Sphingolipid Metabolism	Golgi Apparatus		Irreversible
NAGAly	N-acetylgalactosaminidase, alpha-	[l] : acgagbside_hs + h + udp --> gbside_hs + udpacgal	Sphingolipid Metabolism	Lysosome	3.2.1.49	Irreversible
GBGT1	globoside alpha-1,3-N-acetylgalactosaminyltransferase 1	[g] : gbside_hs + udpacgal --> acgagbside_hs + h + udp	Sphingolipid Metabolism	Golgi Apparatus		Irreversible
B3GALT3g	Beta-1,3-galactosyltransferase 3	[g] : thcrm_hs + udpacgal --> gbside_hs + h + udp	Sphingolipid Metabolism	Golgi Apparatus	2.4.1.79	Irreversible
B3GALT5g	Beta-1,3-galactosyltransferase 5	[g] : gbside_hs + udpgal --> galgbside_hs + h + udp	Sphingolipid Metabolism	Golgi Apparatus		Irreversible
SIAT4Bg	Beta-galactoside alpha-2,3-sialyltransferase, Golgi apparatus	[g] : cmpacna + galgbside_hs --> acngalgbside_hs + cmp + h	Sphingolipid Metabolism	Golgi Apparatus		Irreversible
ST8SIA11	Beta-galactoside alpha-2,3-sialyltransferase	[g] : acngalgbside_hs + cmpacna --> acnacngalgbside_hs + cmp + h	Sphingolipid Metabolism	Golgi Apparatus	2.4.99.8	Irreversible
ST8SIA12	Beta-galactoside alpha-2,3-sialyltransferase	[g] : cmpacna + gm3_hs --> cmp + gd3_hs + h	Sphingolipid Metabolism	Golgi Apparatus	2.4.99.8	Irreversible
ST8SIA51g	Beta-galactoside alpha-2,3-sialyltransferase	[g] : cmpacna + gd3_hs --> cmp + gt3_hs + h	Sphingolipid Metabolism	Golgi Apparatus	2.4.99.8	Irreversible
NMPTRCOX	N-Methylputrescine:oxygen oxidoreductase (deaminating)	[c] : nmptrc + o2 --> 1mpyr + h2o2 + nh4	Alkaloid biosynthesis II	Cytosol	1.4.3.6	Irreversible
HBZOPT10m	Hydroxybenzoate Decaprenyltransferase	[m] : 4hbz + decdp --> 3dphb + ppi	Ubiquinone Biosynthesis	Mitochondria		Irreversible
3DPHBH1	Hydroxylation of 3-Decaprenyl-4-hydroxybenzoate (NADH)	[m] : 3dphb + h + nadh + o2 --> 3dpdhb + h2o + nad	Ubiquinone Biosynthesis	Mitochondria		Irreversible
3DPHBH2	Hydroxylation of 3-Decaprenyl-4-hydroxybenzoate (NADPH)	[m] : 3dphb + h + nadph + o2 --> 3dpdhb + h2o + nadp	Ubiquinone Biosynthesis	Mitochondria		Irreversible
DHDPBMTm	dihydroxydecaprenylbenzoate methyltransferase	[m] : 3dpdhb + amet --> 3dpdhb_me + ahcys + h	Ubiquinone Biosynthesis	Mitochondria		Irreversible
DPHMBDCm	3-Decaprenyl-4-hydroxy-5-methoxybenzoate decarboxylation	[m] : 3dpdhb_me + h --> 2dp6mep + co2	Ubiquinone Biosynthesis	Mitochondria		Irreversible
SIAT9g	Lactosylceramide alpha-2,3-sialyltransferase, Golgi apparatus	[g] : cmpacna + galgluside_hs --> cmp + gm3_hs + h	Sphingolipid Metabolism	Golgi Apparatus	2.4.99.9	Irreversible
GALGT1	Beta-1,4 N-acetylgalactosaminyltransferase	[g] : galgluside_hs + udpacgal --> ga2_hs + h + udp	Sphingolipid Metabolism	Golgi Apparatus	2.4.1.92	Irreversible
GALGT2	Beta-1,4 N-acetylgalactosaminyltransferase	[g] : gm3_hs + udpacgal --> gm2_hs + h + udp	Sphingolipid Metabolism	Golgi Apparatus	2.4.1.92	Irreversible
GALGT3	Beta-1,4 N-acetylgalactosaminyltransferase	[g] : gd3_hs + udpacgal --> gd2_hs + h + udp	Sphingolipid Metabolism	Golgi Apparatus	2.4.1.92	Irreversible
GALGT4	Beta-1,4 N-acetylgalactosaminyltransferase	[g] : gt3_hs + udpacgal --> gt2_hs + h + udp	Sphingolipid Metabolism	Golgi Apparatus	2.4.1.92	Irreversible
ST6GALNAC21	Alpha-N-acetylgalactosaminide alpha-2,6-sialyltransferase 2	[g] : acngalgbside_hs + cmpacna --> acn13acngalgbside_hs + cmp + h	Sphingolipid Metabolism	Golgi Apparatus		Irreversible
ST6GALNAC22	Alpha-N-acetylgalactosaminide alpha-2,6-sialyltransferase 2	[g] : acngalgbside_hs + cmpacna --> acn23acngalgbside_hs + cmp + h	Sphingolipid Metabolism	Golgi Apparatus		Irreversible
ST6GALNAC23	Alpha-N-acetylgalactosaminide alpha-2,6-sialyltransferase 2	[g] : cmpacna + ga2_hs --> cmp + gm2a_hs + h	Sphingolipid Metabolism	Golgi Apparatus		Irreversible
ST6GALNAC24	Alpha-N-acetylgalactosaminide alpha-2,6-sialyltransferase 2	[g] : cmpacna + gm1a_hs --> cmp + gd1b2_hs + h	Sphingolipid Metabolism	Golgi Apparatus		Irreversible
ST6GALNAC25	Alpha-N-acetylgalactosaminide alpha-2,6-sialyltransferase 2	[g] : cmpacna + gd1alpha_hs --> cmp + gt1alpha_hs + h	Sphingolipid Metabolism	Golgi Apparatus		Irreversible
ST6GALNAC26	Alpha-N-acetylgalactosaminide alpha-2,6-sialyltransferase 2	[g] : cmpacna + gt1alpha_hs --> cmp + gq1balpha_hs + h	Sphingolipid Metabolism	Golgi Apparatus		Irreversible
ST6GALNAC27	Alpha-N-acetylgalactosaminide alpha-2,6-sialyltransferase 2	[g] : cmpacna + gt1c_hs --> cmp + gq1c_hs + h	Sphingolipid Metabolism	Golgi Apparatus		Irreversible
ST6GALNAC28	Alpha-N-acetylgalactosaminide alpha-2,6-sialyltransferase 2	[g] : cmpacna + gq1c_hs --> cmp + gp1c_hs + h	Sphingolipid Metabolism	Golgi Apparatus		Irreversible
COQ6m	Ubiquinone biosynthesis monooxgenase COQ6	[m] : 2dp6mep + o2 --> 2dp6mobq + h2o	Ubiquinone Biosynthesis	Mitochondria		Irreversible
ST8SIA52g	Beta-galactoside alpha-2,3-sialyltransferase	[g] : cmpacna + gt1b_hs --> cmp + gq1b_hs + h	Sphingolipid Metabolism	Golgi Apparatus	2.4.99.8	Irreversible
ST8SIA53g	Beta-galactoside alpha-2,3-sialyltransferase	[g] : cmpacna + gd1a_hs --> cmp + gt1a_hs + h	Sphingolipid Metabolism	Golgi Apparatus	2.4.99.8	Irreversible
ST8SIA54g	Beta-galactoside alpha-2,3-sialyltransferase	[g] : cmpacna + gm1b_hs --> cmp + gd1c_hs + h	Sphingolipid Metabolism	Golgi Apparatus	2.4.99.8	Irreversible
B3GNT37g	UDP-GlcNAc:betaGal beta-1,3-N-acetylglucosaminyltransferase 3, Golgi apparatus	[g] : gm2a_hs + udpgal --> gm1a_hs + h + udp	Sphingolipid Metabolism	Golgi Apparatus		Irreversible
B3GNT34g	UDP-GlcNAc:betaGal beta-1,3-N-acetylglucosaminyltransferase 3, Golgi apparatus	[g] : galgbside_hs + uacgam --> acglcgalgbside_hs + h + udp	Sphingolipid Metabolism	Golgi Apparatus		Irreversible
ST6GALNAC31	Alpha-N-acetylgalactosaminide alpha-2,6-sialyltransferase 3	[g] : cmpacna + gm1b_hs --> cmp + gd1alpha_hs + h	Sphingolipid Metabolism	Golgi Apparatus		Irreversible
COQ5m	Ubiquinone biosynthesis methyltransferase COQ5	[m] : 2dp6mobq + amet --> 2dp6mobq_me + ahcys + h	Ubiquinone Biosynthesis	Mitochondria		Irreversible
ST6GALNAC62	sialytransferase 7 ((alpha-N-acetylneuraminyl 2,3-betagalactosyl-1,3)-N-acetyl galactosaminide alpha-2,6-sialytransferase) F	[g] : cmpacna + gt1b_hs --> cmp + gq1balpha_hs + h	Sphingolipid Metabolism	Golgi Apparatus		Irreversible
ST3GAL21g	CMP-N-acetylneuraminate-beta-galactosamide-alpha-2,3-sialyltransferase, Golgi apparatus	[g] : cmpacna + ga1_hs --> cmp + gm1b_hs + h	Sphingolipid Metabolism	Golgi Apparatus		Irreversible
COQ7m	Ubiquinone biosynthesis COQ7	[m] : 2dp6mobq_me + h + nadph + o2 --> 2dpmhobq + h2o + nadp	Ubiquinone Biosynthesis	Mitochondria		Irreversible
ST3GAL22g	CMP-N-acetylneuraminate-beta-galactosamide-alpha-2,3-sialyltransferase, Golgi apparatus	[g] : cmpacna + gm1_hs --> cmp + gd1a_hs + h	Sphingolipid Metabolism	Golgi Apparatus		Irreversible
COQ3m	methyltransferase COQ3	[m] : 2dpmhobq + amet --> ahcys + h + q10	Ubiquinone Biosynthesis	Mitochondria		Irreversible
ST3GAL23g	CMP-N-acetylneuraminate-beta-galactosamide-alpha-2,3-sialyltransferase, Golgi apparatus	[g] : cmpacna + gd1b_hs --> cmp + gt1b_hs + h	Sphingolipid Metabolism	Golgi Apparatus		Irreversible
B3GALT41g	Beta-1,3-galactosyltransferase 4	[g] : ga2_hs + udpgal --> ga1_hs + h + udp	Sphingolipid Metabolism	Golgi Apparatus	2.4.1.62	Irreversible
B3GALT42g	Beta-1,3-galactosyltransferase 4	[g] : gm2_hs + udpgal --> gm1_hs + h + udp	Sphingolipid Metabolism	Golgi Apparatus	2.4.1.62	Irreversible
B3GALT43g	Beta-1,3-galactosyltransferase 4	[g] : gd2_hs + udpgal --> gd1b_hs + h + udp	Sphingolipid Metabolism	Golgi Apparatus	2.4.1.62	Irreversible
B3GALT44g	Beta-1,3-galactosyltransferase 4	[g] : gt2_hs + udpgal --> gt1c_hs + h + udp	Sphingolipid Metabolism	Golgi Apparatus	2.4.1.62	Irreversible
COKECBESr	Carboxylesterase (cocaine) (er)	[r] : coke + h2o --> bz + egme + h	Alkaloid biosynthesis II	Endoplasmic Reticulum	3.1.1.1	Irreversible
B3GNT38g	UDP-GlcNAc:betaGal beta-1,3-N-acetylglucosaminyltransferase 3, Golgi apparatus	[g] : galside_hs + udpgal --> digalside_hs + h + udp	Sphingolipid Metabolism	Golgi Apparatus		Irreversible
SMPD3l	sphingomyelin phosphodiesterase 3, neutral membrane (neutral sphingomyelinase II)	[l] : h2o + sphmyln_hs --> cholp + crm_hs + h	Sphingolipid Metabolism	Lysosome		Irreversible
SPHK21c	sphingosine kinase 2	[c] : atp + sphings --> adp + h + sphs1p	Sphingolipid Metabolism	Cytosol		Irreversible
DNDPt1m	dATP transport via ADP antiport	adp[m] + datp[c] --> adp[c] + datp[m]	Transport, Mitochondrial	Cytosol, Mitochondria		Irreversible
DNDPt2m	dATP transport via ATP antiport	atp[m] + datp[c] --> atp[c] + datp[m]	Transport, Mitochondrial	Cytosol, Mitochondria		Irreversible
DNDPt6m	dATP transport via dGDP antiport	datp[c] + dgdp[m] --> datp[m] + dgdp[c]	Transport, Mitochondrial	Cytosol, Mitochondria		Irreversible
DNDPt5m	dATP transport via dTDP antiport	datp[c] + dtdp[m] --> datp[m] + dtdp[c]	Transport, Mitochondrial	Cytosol, Mitochondria		Irreversible
DNDPt4m	dATP transport via dUDP antiport	datp[c] + dudp[m] --> datp[m] + dudp[c]	Transport, Mitochondrial	Cytosol, Mitochondria		Irreversible
DNDPt3m	dATP transport via dCDP antiport	datp[c] + dcdp[m] --> datp[m] + dcdp[c]	Transport, Mitochondrial	Cytosol, Mitochondria		Irreversible
DNDPt7m	dATP transport via dADP antiport	dadp[m] + datp[c] --> dadp[c] + datp[m]	Transport, Mitochondrial	Cytosol, Mitochondria		Irreversible
DNDPt8m	dADP transport via dUDP antiport	dadp[c] + dudp[m] --> dadp[m] + dudp[c]	Transport, Mitochondrial	Cytosol, Mitochondria		Irreversible
DNDPt9m	dADP transport via dTDP antiport	dadp[c] + dtdp[m] --> dadp[m] + dtdp[c]	Transport, Mitochondrial	Cytosol, Mitochondria		Irreversible
DNDPt10m	dADP transport via dCDP antiport	dadp[c] + dcdp[m] --> dadp[m] + dcdp[c]	Transport, Mitochondrial	Cytosol, Mitochondria		Irreversible
DNDPt11m	dADP transport via dGDP antiport	dadp[c] + dgdp[m] --> dadp[m] + dgdp[c]	Transport, Mitochondrial	Cytosol, Mitochondria		Irreversible
DNDPt12m	dADP transport via ADP antiport	adp[m] + dadp[c] --> adp[c] + dadp[m]	Transport, Mitochondrial	Cytosol, Mitochondria		Irreversible
DNDPt13m	dADP transport via ATP antiport	atp[m] + dadp[c] --> atp[c] + dadp[m]	Transport, Mitochondrial	Cytosol, Mitochondria		Irreversible
DNDPt14m	dUDP transport via dTDP antiport	dtdp[m] + dudp[c] --> dtdp[c] + dudp[m]	Transport, Mitochondrial	Cytosol, Mitochondria		Irreversible
DNDPt15m	dUDP transport via dGDP antiport	dgdp[m] + dudp[c] --> dgdp[c] + dudp[m]	Transport, Mitochondrial	Cytosol, Mitochondria		Irreversible
DNDPt16m	dUDP transport via dADP antiport	dadp[m] + dudp[c] --> dadp[c] + dudp[m]	Transport, Mitochondrial	Cytosol, Mitochondria		Irreversible
SBPP3er	sphingoid base-phosphate phosphatase (sphinganine 1-phosphatase), endoplasmic reticulum	[r] : h2o + sphs1p --> pi + sphings	Sphingolipid Metabolism	Endoplasmic Reticulum		Irreversible
DNDPt17m	dUDP transport via dCDP antiport	dcdp[m] + dudp[c] --> dcdp[c] + dudp[m]	Transport, Mitochondrial	Cytosol, Mitochondria		Irreversible
DNDPt18m	dUDP transport via ADP antiport	adp[m] + dudp[c] --> adp[c] + dudp[m]	Transport, Mitochondrial	Cytosol, Mitochondria		Irreversible
DNDPt19m	dUDP transport via ATP antiport	atp[m] + dudp[c] --> atp[c] + dudp[m]	Transport, Mitochondrial	Cytosol, Mitochondria		Irreversible
GAL3ST11	Galactosylceramide sulfotransferase	[g] : galside_hs + paps --> h + pap + sgalside_hs	Sphingolipid Metabolism	Golgi Apparatus	2.8.2.11	Irreversible
GAL3ST12	Galactosylceramide sulfotransferase	[g] : digalside_hs + paps --> digalsgalside_hs + h + pap	Sphingolipid Metabolism	Golgi Apparatus	2.8.2.11	Irreversible
ARSA	Arylsulfatase A	[l] : h2o + sgalside_hs --> galside_hs + h + so4	Sphingolipid Metabolism	Lysosome	3.1.6.8	Irreversible
CERK	Ceramide kinase	[c] : atp + crm_hs --> adp + crmp_hs + h	Sphingolipid Metabolism	Cytosol	2.7.1.138	Irreversible
DNDPt20m	dTDP transport via ATP antiport	atp[m] + dtdp[c] --> atp[c] + dtdp[m]	Transport, Mitochondrial	Cytosol, Mitochondria		Irreversible
DNDPt21m	dTDP transport via ADP antiport	adp[m] + dtdp[c] --> adp[c] + dtdp[m]	Transport, Mitochondrial	Cytosol, Mitochondria		Irreversible
DNDPt22m	dTDP transport via dUDP antiport	dtdp[c] + dudp[m] --> dtdp[m] + dudp[c]	Transport, Mitochondrial	Cytosol, Mitochondria		Irreversible
DNDPt23m	dTDP transport via dGTP antiport	dgdp[m] + dtdp[c] --> dgdp[c] + dtdp[m]	Transport, Mitochondrial	Cytosol, Mitochondria		Irreversible
DNDPt24m	dTDP transport via dADP antiport	dadp[m] + dtdp[c] --> dadp[c] + dtdp[m]	Transport, Mitochondrial	Cytosol, Mitochondria		Irreversible
DNDPt25m	dTDP transport via dCDP antiport	dcdp[m] + dtdp[c] --> dcdp[c] + dtdp[m]	Transport, Mitochondrial	Cytosol, Mitochondria		Irreversible
DNDPt26m	dCDP transport via dUDP antiport	dcdp[c] + dudp[m] --> dcdp[m] + dudp[c]	Transport, Mitochondrial	Cytosol, Mitochondria		Irreversible
DNDPt27m	dCDP transport via dTDP antiport	dcdp[c] + dtdp[m] --> dcdp[m] + dtdp[c]	Transport, Mitochondrial	Cytosol, Mitochondria		Irreversible
DNDPt28m	dCDP transport via dGDP antiport	dcdp[c] + dgdp[m] --> dcdp[m] + dgdp[c]	Transport, Mitochondrial	Cytosol, Mitochondria		Irreversible
DNDPt29m	dCDP transport via dADP antiport	dadp[m] + dcdp[c] --> dadp[c] + dcdp[m]	Transport, Mitochondrial	Cytosol, Mitochondria		Irreversible
DNDPt30m	dCDP transport via ADP antiport	adp[m] + dcdp[c] --> adp[c] + dcdp[m]	Transport, Mitochondrial	Cytosol, Mitochondria		Irreversible
DNDPt31m	dCDP transport via ATP antiport	atp[m] + dcdp[c] --> atp[c] + dcdp[m]	Transport, Mitochondrial	Cytosol, Mitochondria		Irreversible
DNDPt32m	dGDP transport via ATP antiport	atp[m] + dgdp[c] --> atp[c] + dgdp[m]	Transport, Mitochondrial	Cytosol, Mitochondria		Irreversible
DNDPt33m	dGDP transport via dUDP antiport	dgdp[c] + dudp[m] --> dgdp[m] + dudp[c]	Transport, Mitochondrial	Cytosol, Mitochondria		Irreversible
DNDPt34m	dGDP transport via dTDP antiport	dgdp[c] + dtdp[m] --> dgdp[m] + dtdp[c]	Transport, Mitochondrial	Cytosol, Mitochondria		Irreversible
DNDPt35m	dGDP transport via dADP antiport	dadp[m] + dgdp[c] --> dadp[c] + dgdp[m]	Transport, Mitochondrial	Cytosol, Mitochondria		Irreversible
DNDPt36m	dGDP transport via dCDP antiport	dcdp[m] + dgdp[c] --> dcdp[c] + dgdp[m]	Transport, Mitochondrial	Cytosol, Mitochondria		Irreversible
DNDPt37m	dUTP transport via dTDP antiport	dtdp[m] + dutp[c] --> dtdp[c] + dutp[m]	Transport, Mitochondrial	Cytosol, Mitochondria		Irreversible
DNDPt38m	dUTP transport via dUDP antiport	dudp[m] + dutp[c] --> dudp[c] + dutp[m]	Transport, Mitochondrial	Cytosol, Mitochondria		Irreversible
DNDPt39m	dUTP transport via dGDP antiport	dgdp[m] + dutp[c] --> dgdp[c] + dutp[m]	Transport, Mitochondrial	Cytosol, Mitochondria		Irreversible
DNDPt40m	dUTP transport via dADP antiport	dadp[m] + dutp[c] --> dadp[c] + dutp[m]	Transport, Mitochondrial	Cytosol, Mitochondria		Irreversible
DNDPt41m	dUTP transport via dCDP antiport	dcdp[m] + dutp[c] --> dcdp[c] + dutp[m]	Transport, Mitochondrial	Cytosol, Mitochondria		Irreversible
DNDPt42m	dUTP transport via ADP antiport	adp[m] + dutp[c] --> adp[c] + dutp[m]	Transport, Mitochondrial	Cytosol, Mitochondria		Irreversible
DNDPt43m	dUTP transport via ATP antiport	atp[m] + dutp[c] --> atp[c] + dutp[m]	Transport, Mitochondrial	Cytosol, Mitochondria		Irreversible
DNDPt44m	dTTP transport via ATP antiport	atp[m] + dttp[c] --> atp[c] + dttp[m]	Transport, Mitochondrial	Cytosol, Mitochondria		Irreversible
DNDPt45m	dTTP transport via ADP antiport	adp[m] + dttp[c] --> adp[c] + dttp[m]	Transport, Mitochondrial	Cytosol, Mitochondria		Irreversible
DNDPt46m	dTTP transport via dUDP antiport	dttp[c] + dudp[m] --> dttp[m] + dudp[c]	Transport, Mitochondrial	Cytosol, Mitochondria		Irreversible
DNDPt47m	dTTP transport via dTDP antiport	dtdp[m] + dttp[c] --> dtdp[c] + dttp[m]	Transport, Mitochondrial	Cytosol, Mitochondria		Irreversible
DNDPt48m	dTTP transport via dGDP antiport	dgdp[m] + dttp[c] --> dgdp[c] + dttp[m]	Transport, Mitochondrial	Cytosol, Mitochondria		Irreversible
DNDPt49m	dTTP transport via dADP antiport	dadp[m] + dttp[c] --> dadp[c] + dttp[m]	Transport, Mitochondrial	Cytosol, Mitochondria		Irreversible
DNDPt50m	dTTP transport via dCDP antiport	dcdp[m] + dttp[c] --> dcdp[c] + dttp[m]	Transport, Mitochondrial	Cytosol, Mitochondria		Irreversible
DNDPt51m	dCTP transport via dCDP antiport	dcdp[m] + dctp[c] --> dcdp[c] + dctp[m]	Transport, Mitochondrial	Cytosol, Mitochondria		Irreversible
DNDPt52m	dCTP transport via dUDP antiport	dctp[c] + dudp[m] --> dctp[m] + dudp[c]	Transport, Mitochondrial	Cytosol, Mitochondria		Irreversible
DNDPt53m	dCTP transport via dGDP antiport	dctp[c] + dgdp[m] --> dctp[m] + dgdp[c]	Transport, Mitochondrial	Cytosol, Mitochondria		Irreversible
DNDPt54m	dCTP transport via dADP antiport	dadp[m] + dctp[c] --> dadp[c] + dctp[m]	Transport, Mitochondrial	Cytosol, Mitochondria		Irreversible
DNDPt55m	dCTP transport via ADP antiport	adp[m] + dctp[c] --> adp[c] + dctp[m]	Transport, Mitochondrial	Cytosol, Mitochondria		Irreversible
DNDPt56m	dCTP transport via ATP antiport	atp[m] + dctp[c] --> atp[c] + dctp[m]	Transport, Mitochondrial	Cytosol, Mitochondria		Irreversible
DNDPt57m	dGTP transport via ATP antiport	atp[m] + dgtp[c] --> atp[c] + dgtp[m]	Transport, Mitochondrial	Cytosol, Mitochondria		Irreversible
DNDPt58m	dGTP transport via ADP antiport	adp[m] + dgtp[c] --> adp[c] + dgtp[m]	Transport, Mitochondrial	Cytosol, Mitochondria		Irreversible
DNDPt59m	dGTP transport via dADP antiport	dadp[m] + dgtp[c] --> dadp[c] + dgtp[m]	Transport, Mitochondrial	Cytosol, Mitochondria		Irreversible
DNDPt60m	dGTP transport via dUDP antiport	dgtp[c] + dudp[m] --> dgtp[m] + dudp[c]	Transport, Mitochondrial	Cytosol, Mitochondria		Irreversible
DNDPt61m	dGTP transport via dTDP antiport	dgtp[c] + dtdp[m] --> dgtp[m] + dtdp[c]	Transport, Mitochondrial	Cytosol, Mitochondria		Irreversible
DNDPt62m	dGTP transport via dGDP antiport	dgdp[m] + dgtp[c] --> dgdp[c] + dgtp[m]	Transport, Mitochondrial	Cytosol, Mitochondria		Irreversible
DNDPt63m	dGTP transport via dCDP antiport	dcdp[m] + dgtp[c] --> dcdp[c] + dgtp[m]	Transport, Mitochondrial	Cytosol, Mitochondria		Irreversible
UGCG	Ceramide glucosyltransferase	[r] : crm_hs + udpg --> gluside_hs + h + udp	Sphingolipid Metabolism	Endoplasmic Reticulum	2.4.1.80	Irreversible
GBAl	Glucosylceramidase	[l] : gluside_hs + h2o --> crm_hs + glc-D	Sphingolipid Metabolism	Lysosome	3.2.1.45	Irreversible
GALC	Galactocerebrosidase	[l] : galside_hs + h2o --> crm_hs + gal	Sphingolipid Metabolism	Lysosome	3.2.1.46	Irreversible
B3GNT39g	UDP-GlcNAc:betaGal beta-1,3-N-acetylglucosaminyltransferase 3, Golgi apparatus	[g] : gluside_hs + udpgal --> galgluside_hs + h + udp	Sphingolipid Metabolism	Golgi Apparatus		Irreversible
GLB1	Beta-galactosidase	[l] : galgluside_hs + h2o --> gal + gluside_hs	Sphingolipid Metabolism	Lysosome	3.2.1.23	Irreversible
SGPL11r	Sphingosine-1-phosphate lyase 1	[r] : sph1p --> ethamp + hxdcal	Sphingolipid Metabolism	Endoplasmic Reticulum	4.1.2.27	Irreversible
GLAl	galactosidase, alpha	[l] : digalside_hs + h2o --> gal + galside_hs	Sphingolipid Metabolism	Lysosome	3.2.1.22	Irreversible
PDE4n	3',5'-cyclic-nucleotide phosphodiesterase, Nucleus	[n] : 35cgmp + h2o --> gmp + h	Nucleotides	Nucleus	3.1.4.17	Irreversible
SMPD3g	sphingomyelin phosphodiesterase 3, neutral membrane (neutral sphingomyelinase II)	[g] : h2o + sphmyln_hs --> cholp + crm_hs + h	Sphingolipid Metabolism	Golgi Apparatus		Irreversible
GPIAT	glucosaminylphosphatidyl inositol acetyltransferase	[c] : gpail_hs + pmtcoa --> coa + gacpail_hs	Glycosylphosphatidylinositol (GPI)-anchor biosynthesis	Cytosol		Irreversible
EGMESTr	ecgonine methyl esterase (ER)	[r] : egme + h2o --> ecgon + h + meoh	Alkaloid biosynthesis II	Endoplasmic Reticulum		Irreversible
GPIMTer_L	GlcN-acylPI mannosyltransferase, endoplasmic reticulum	[r] : (0.1) dolmanp_L + gacpail_hs --> (0.1) dolp_L + h + mgacpail_hs	Glycosylphosphatidylinositol (GPI)-anchor biosynthesis	Endoplasmic Reticulum		Irreversible
ECGISOr	Ecgonine isomerase (ER)	[r] : ecgon <==> pecgon	Alkaloid biosynthesis II	Endoplasmic Reticulum		Reversible
H2MTer_L	H2 mannosyltransferase, endoplasmic reticulum	[r] : (0.1) dolmanp_L + mgacpail_hs --> (0.1) dolp_L + h + m2gacpail_hs	Glycosylphosphatidylinositol (GPI)-anchor biosynthesis	Endoplasmic Reticulum		Irreversible
PECGONCOATr	Pseudoecgonine CoA transferase (ER)	[r] : atp + coa + h + pecgon --> amp + pecgoncoa + ppi	Alkaloid biosynthesis II	Endoplasmic Reticulum		Irreversible
P5CRm	pyrroline-5-carboxylate reductase (m)	[m] : 1pyr5c + (2) h + nadph --> nadp + pro-L	Arginine and Proline Metabolism	Mitochondria	1.5.1.2	Irreversible
P5CRxm	pyrroline-5-carboxylate reductase (m)	[m] : 1pyr5c + (2) h + nadh --> nad + pro-L	Arginine and Proline Metabolism	Mitochondria	1.5.1.2	Irreversible
ST8SIA55g	Beta-galactoside alpha-2,3-sialyltransferase	[g] : cmpacna + gq1c_hs --> cmp + gp1calpha_hs + h	Sphingolipid Metabolism	Golgi Apparatus	2.4.99.8	Irreversible
GACPAILter	glucosaminyl-acylphosphatidylinositol ER flippase	gacpail_hs[c] --> gacpail_hs[r]	Transport, Endoplasmic Reticular	Cytosol, Endoplasmic Reticulum		Irreversible
2OXOADPTm	2-oxoadipate shuttle (cytosol/mitochondria)	2oxoadp[c] + akg[m] <==> 2oxoadp[m] + akg[c]	Tryptophan metabolism	Cytosol, Mitochondria		Reversible
2AMADPTm	L-2-aminoadipate shuttle (cytosol/mitochondria)	L2aadp[c] + akg[m] <==> L2aadp[m] + akg[c]	Lysine Metabolism	Cytosol, Mitochondria		Reversible
SPMDOX	Spermidine:(acceptor) oxidoreductase	[c] : h2o + o2 + spmd --> 13dampp + 4abutn + h2o2	beta-Alanine metabolism	Cytosol	1.5.99.6	Irreversible
H2ETer	H2 phosphoethanolaminyl transferase, endoplasmic reticulum	[r] : mgacpail_hs + pe_hs --> dag_hs + emgacpail_hs	Glycosylphosphatidylinositol (GPI)-anchor biosynthesis	Endoplasmic Reticulum		Irreversible
H5MTer_L	H5 mannosyltransferase, endoplasmic reticulum	[r] : (0.1) dolmanp_L + emgacpail_hs --> (0.1) dolp_L + h + memgacpail_hs	Glycosylphosphatidylinositol (GPI)-anchor biosynthesis	Endoplasmic Reticulum		Irreversible
BMTer_L	B mannosyltransferase, endoplasmic reticulum	[r] : (0.1) dolmanp_L + memgacpail_hs --> (0.1) dolp_L + h + m2emgacpail_hs	Glycosylphosphatidylinositol (GPI)-anchor biosynthesis	Endoplasmic Reticulum		Irreversible
H3MTer_L	H3 mannosyltransferase, endoplasmic reticulum	[r] : (0.1) dolmanp_L + m2gacpail_hs --> (0.1) dolp_L + h + m3gacpail_hs	Glycosylphosphatidylinositol (GPI)-anchor biosynthesis	Endoplasmic Reticulum		Irreversible
H3ETer	H3 phosphoethanolaminyl transferase, endoplasmic reticulum	[r] : m2gacpail_hs + pe_hs --> dag_hs + memgacpail_hs	Glycosylphosphatidylinositol (GPI)-anchor biosynthesis	Endoplasmic Reticulum		Irreversible
H4ETer	H4 phosphoethanolaminyl transferase, endoplasmic reticulum	[r] : m3gacpail_hs + pe_hs --> dag_hs + m2emgacpail_hs	Glycosylphosphatidylinositol (GPI)-anchor biosynthesis	Endoplasmic Reticulum		Irreversible
H4ET3er	H4 phosphoethanolaminyl transferase, endoplasmic reticulum	[r] : m3gacpail_hs + pe_hs --> dag_hs + em3gacpail_hs	Glycosylphosphatidylinositol (GPI)-anchor biosynthesis	Endoplasmic Reticulum		Irreversible
H6'ET2er	H6' phosphoethanolaminyl transferase, endoplasmic reticulum	[r] : em3gacpail_hs + pe_hs --> dag_hs + emem2gacpail_hs	Glycosylphosphatidylinositol (GPI)-anchor biosynthesis	Endoplasmic Reticulum		Irreversible
H6'ETer	H6' phosphoethanolaminyl transferase, endoplasmic reticulum	[r] : em3gacpail_hs + pe_hs --> dag_hs + em2emgacpail_hs	Glycosylphosphatidylinositol (GPI)-anchor biosynthesis	Endoplasmic Reticulum		Irreversible
H6ET3er	H6 phosphoethanolaminyl transferase, endoplasmic reticulum	[r] : m2emgacpail_hs + pe_hs --> dag_hs + em2emgacpail_hs	Glycosylphosphatidylinositol (GPI)-anchor biosynthesis	Endoplasmic Reticulum		Irreversible
H7ET2er	H7 phosphoethanolaminyl transferase, endoplasmic reticulum	[r] : em2emgacpail_hs + pe_hs --> dag_hs + gpi_hs	Glycosylphosphatidylinositol (GPI)-anchor biosynthesis	Endoplasmic Reticulum		Irreversible
H7'ETer	H7' phosphoethanolaminyl transferase, endoplasmic reticulum	[r] : emem2gacpail_hs + pe_hs --> dag_hs + gpi_hs	Glycosylphosphatidylinositol (GPI)-anchor biosynthesis	Endoplasmic Reticulum		Irreversible
PVD3	Previtamin D3 formation	[c] : 7dhchsterol <==> pd3	Vitamin D	Cytosol		Reversible
VD3	Vitamin D3 formation	[c] : pd3 <==> vitd3	Vitamin D	Cytosol		Reversible
TS3	Tachysterol 3 formation	[c] : pd3 <==> ts3	Vitamin D	Cytosol		Reversible
LS3	Lumisterol 3 formation	[c] : pd3 <==> lum3	Vitamin D	Cytosol		Reversible
VITD3Hm	Vitamin D-25-hydroxylase (D3)	[m] : h + nadph + o2 + vitd3 --> 25hvitd3 + h2o + nadp	Vitamin D	Mitochondria		Irreversible
VITD2Hm	Vitamin D-25-hydroxylase (D2)	[m] : h + nadph + o2 + vitd2 --> 25hvitd2 + h2o + nadp	Vitamin D	Mitochondria		Irreversible
25VITD3Hm	1-alpha-Vitamin D-25-hydroxylase (D3)	[m] : 25hvitd3 + h + nadph + o2 --> 1a25dhvitd3 + h2o + nadp	Vitamin D	Mitochondria		Irreversible
25VITD2Hm	1-alpha-Vitamin D-25-hydroxylase (D2)	[m] : 25hvitd2 + h + nadph + o2 --> 1a25dhvitd2 + h2o + nadp	Vitamin D	Mitochondria		Irreversible
24,25VITD2Hm	24R-Vitamin D-25-hydroxylase (D2)	[m] : 25hvitd2 + h + nadph + o2 --> 2425dhvitd2 + h2o + nadp	Vitamin D	Mitochondria		Irreversible
24,25VITD3Hm	24R-Vitamin D-25-hydroxylase (D3)	[m] : 25hvitd3 + h + nadph + o2 --> 2425dhvitd3 + h2o + nadp	Vitamin D	Mitochondria		Irreversible
VITD2tm	Vitamin D2 transport from mitochondria	vitd2[m] <==> vitd2[c]	Transport, Mitochondrial	Cytosol, Mitochondria		Reversible
VITD3tm	Vitamin D3 transport from mitochondria	vitd3[m] --> vitd3[c]	Transport, Mitochondrial	Cytosol, Mitochondria		Irreversible
H8TAer	H8 transamidase, endoplasmic reticulum	[r] : gpi_hs + pre_prot --> gpi_prot_hs + gpi_sig	Glycosylphosphatidylinositol (GPI)-anchor biosynthesis	Endoplasmic Reticulum		Irreversible
H7'TAer	H7' transamidase, endoplasmic reticulum	[r] : em2emgacpail_hs + pre_prot --> em2emgacpail_prot_hs + gpi_sig	Glycosylphosphatidylinositol (GPI)-anchor biosynthesis	Endoplasmic Reticulum		Irreversible
GPIDAer	glycophosphatidylinositol (GPI) deacylase, endoplasmic reticulum	[r] : gpi_prot_hs + h2o --> dgpi_prot_hs + h + hdca	Glycosylphosphatidylinositol (GPI)-anchor biosynthesis	Endoplasmic Reticulum		Irreversible
GPIDA2er	glycophosphatidylinositol (GPI) deacylase, endoplasmic reticulum	[r] : em2emgacpail_prot_hs + h2o --> dem2emgacpail_prot_hs + h + hdca	Glycosylphosphatidylinositol (GPI)-anchor biosynthesis	Endoplasmic Reticulum		Irreversible
M4CET3er	M4C phosphoethanolaminyl transferase, endoplasmic reticulum	[r] : m3emgacpail_hs + pe_hs --> dag_hs + mem2emgacpail_hs	Glycosylphosphatidylinositol (GPI)-anchor biosynthesis	Endoplasmic Reticulum		Irreversible
M4BET2er	M4B phosphoethanolaminyl transferase, endoplasmic reticulum	[r] : mem2emgacpail_hs + pe_hs --> dag_hs + m(em)3gacpail_hs	Glycosylphosphatidylinositol (GPI)-anchor biosynthesis	Endoplasmic Reticulum		Irreversible
H6MTer_L	H6 mannosyltransferase, endoplasmic reticulum	[r] : (0.1) dolmanp_L + m2emgacpail_hs --> (0.1) dolp_L + h + m3emgacpail_hs	Glycosylphosphatidylinositol (GPI)-anchor biosynthesis	Endoplasmic Reticulum		Irreversible
H7MTer_L	H7 mannosyltransferase, endoplasmic reticulum	[r] : (0.1) dolmanp_L + em2emgacpail_hs --> (0.1) dolp_L + h + mem2emgacpail_hs	Glycosylphosphatidylinositol (GPI)-anchor biosynthesis	Endoplasmic Reticulum		Irreversible
H8MTer_L	H8 mannosyltransferase, endoplasmic reticulum	[r] : (0.1) dolmanp_L + gpi_hs --> (0.1) dolp_L + h + m(em)3gacpail_hs	Glycosylphosphatidylinositol (GPI)-anchor biosynthesis	Endoplasmic Reticulum		Irreversible
M4BTAer	M4B transamidase, endoplasmic reticulum	[r] : mem2emgacpail_hs + pre_prot --> gpi_sig + mem2emgacpail_prot_hs	Glycosylphosphatidylinositol (GPI)-anchor biosynthesis	Endoplasmic Reticulum		Irreversible
M4ATAer	M4A transamidase, endoplasmic reticulum	[r] : m(em)3gacpail_hs + pre_prot --> gpi_sig + m(em)3gacpail_prot_hs	Glycosylphosphatidylinositol (GPI)-anchor biosynthesis	Endoplasmic Reticulum		Irreversible
BMTer_U	B mannosyltransferase, endoplasmic reticulum	[r] : (0.1) dolmanp_U + memgacpail_hs --> (0.1) dolp_U + h + m2emgacpail_hs	Glycosylphosphatidylinositol (GPI)-anchor biosynthesis	Endoplasmic Reticulum		Irreversible
GPIMTer_U	GlcN-acylPI mannosyltransferase, endoplasmic reticulum	[r] : (0.1) dolmanp_U + gacpail_hs --> (0.1) dolp_U + h + mgacpail_hs	Glycosylphosphatidylinositol (GPI)-anchor biosynthesis	Endoplasmic Reticulum		Irreversible
H2MTer_U	H2 mannosyltransferase, endoplasmic reticulum	[r] : (0.1) dolmanp_U + mgacpail_hs --> (0.1) dolp_U + h + m2gacpail_hs	Glycosylphosphatidylinositol (GPI)-anchor biosynthesis	Endoplasmic Reticulum		Irreversible
H3MTer_U	H3 mannosyltransferase, endoplasmic reticulum	[r] : (0.1) dolmanp_U + m2gacpail_hs --> (0.1) dolp_U + h + m3gacpail_hs	Glycosylphosphatidylinositol (GPI)-anchor biosynthesis	Endoplasmic Reticulum		Irreversible
H5MTer_U	H5 mannosyltransferase, endoplasmic reticulum	[r] : (0.1) dolmanp_U + emgacpail_hs --> (0.1) dolp_U + h + memgacpail_hs	Glycosylphosphatidylinositol (GPI)-anchor biosynthesis	Endoplasmic Reticulum		Irreversible
H6MTer_U	H6 mannosyltransferase, endoplasmic reticulum	[r] : (0.1) dolmanp_U + m2emgacpail_hs --> (0.1) dolp_U + h + m3emgacpail_hs	Glycosylphosphatidylinositol (GPI)-anchor biosynthesis	Endoplasmic Reticulum		Irreversible
H7MTer_U	H7 mannosyltransferase, endoplasmic reticulum	[r] : (0.1) dolmanp_U + em2emgacpail_hs --> (0.1) dolp_U + h + mem2emgacpail_hs	Glycosylphosphatidylinositol (GPI)-anchor biosynthesis	Endoplasmic Reticulum		Irreversible
H8MTer_U	H8 mannosyltransferase, endoplasmic reticulum	[r] : (0.1) dolmanp_U + gpi_hs --> (0.1) dolp_U + h + m(em)3gacpail_hs	Glycosylphosphatidylinositol (GPI)-anchor biosynthesis	Endoplasmic Reticulum		Irreversible
DNAMTSEn	DNA (cytosine-5-)-methyltransferase, nucleus	[n] : dna + seasmet --> dna5mtc + h + seahcys	Selenoamino acid metabolism	Nucleus	2.1.1.37	Irreversible
GAO1	Ganglioside O-acetylation	[c] : accoa + gd3_hs --> coa + oagd3_hs	Sphingolipid Metabolism	Cytosol		Irreversible
GAO2	Ganglioside O-acetylation	[c] : accoa + gt3_hs --> coa + oagt3_hs	Sphingolipid Metabolism	Cytosol		Irreversible
24,25DHVITD2tm	24,25-Dihydroxyvitamin D2 transport from mitochondria	2425dhvitd2[m] --> 2425dhvitd2[c]	Transport, Mitochondrial	Cytosol, Mitochondria		Irreversible
24,25DHVITD3tm	24,25-Dihydroxyvitamin D3 transport from mitochondria	2425dhvitd3[m] --> 2425dhvitd3[c]	Transport, Mitochondrial	Cytosol, Mitochondria		Irreversible
25HVITD2tm	25-hydroxyvitamin D2 transport from mitochondria	25hvitd2[m] --> 25hvitd2[c]	Transport, Mitochondrial	Cytosol, Mitochondria		Irreversible
25HVITD2tin-m	25-hydroxyvitamin D2 transport in mitochondria	25hvitd2[c] --> 25hvitd2[m]	Transport, Mitochondrial	Cytosol, Mitochondria		Irreversible
25HVITD3tin-m	25-hydroxyvitamin D3 transport in mitochondria	25hvitd3[c] --> 25hvitd3[m]	Transport, Mitochondrial	Cytosol, Mitochondria		Irreversible
25HVITD3tm	25-hydroxyvitamin D3 transport from mitochondria	25hvitd3[m] --> 25hvitd3[c]	Transport, Mitochondrial	Cytosol, Mitochondria		Irreversible
1a,24,25VITD2Hm	1-alpha-Vitamin D-24,25-hydroxylase (D2)	[m] : 2425dhvitd2 + h + nadph + o2 --> 1a2425thvitd2 + h2o + nadp	Vitamin D	Mitochondria		Irreversible
1a,24,25VITD3Hm	1-alpha-Vitamin D-24,25-hydroxylase (D3)	[m] : 2425dhvitd3 + h + nadph + o2 --> 1a2425thvitd3 + h2o + nadp	Vitamin D	Mitochondria		Irreversible
1a,25VITD2Hm	1-alpha,24R,25-Vitamin D-hydroxylase (D2)	[m] : 1a25dhvitd2 + h + nadph + o2 --> 1a2425thvitd2 + h2o + nadp	Vitamin D	Mitochondria		Irreversible
1a,25VITD3Hm	1-alpha,24R,25-Vitamin D-hydroxylase (D3)	[m] : 1a25dhvitd3 + h + nadph + o2 --> 1a2425thvitd3 + h2o + nadp	Vitamin D	Mitochondria		Irreversible
DOPAMT	Dopamine:amet O-methyltransferase	[c] : amet + dopa --> 3moxtyr + ahcys + h	Tyrosine metabolism	Cytosol	2.1.1.6	Irreversible
3MOXTYROX	3-Methoxytyramine:oxygen oxidoreductase (deaminating)	[c] : 3moxtyr + h2o + o2 --> 3mox4hpac + h2o2 + nh4	Tyrosine metabolism	Cytosol	1.4.3.4	Irreversible
34DHPHAMT	3,4-Dihydroxyphenylacetate:amet O-methyltransferase	[c] : 34dhpha + amet --> ahcys + h + homoval	Tyrosine metabolism	Cytosol	2.1.1.6	Irreversible
A4GALTc	Lactosylceramide 4-alpha-galactosyltransferase	[c] : galgluside_hs + udpgal --> h + thcrm_hs + udp	Sphingolipid Metabolism	Cytosol		Irreversible
S23T2g	beta-galactoside alpha-2,3-sialyltransferase (core 2)	[g] : cmpacna + core2 --> cmp + h + ksii_core2_pre1	Keratan sulfate biosynthesis	Golgi Apparatus	2.4.99.4	Irreversible
GBA	Glucosylceramidase	[c] : gluside_hs + h2o --> crm_hs + glc-D	Sphingolipid Metabolism	Cytosol	3.2.1.45	Irreversible
G14T2g	beta-N-acetylglucosaminylglycopeptide beta-1,4-galactosyltransferase, Golgi	[g] : ksii_core2_pre1 + udpgal --> h + ksii_core2_pre2 + udp	Keratan sulfate biosynthesis	Golgi Apparatus	2.4.1.38	Irreversible
SMS	Sphingomyelin synthase (homo sapiens)	[c] : crm_hs + pchol_hs --> dag_hs + sphmyln_hs	Sphingolipid Metabolism	Cytosol		Irreversible
CCA_D3tm	Calcitroic acid transport from mitochondria	cca_d3[m] --> cca_d3[c]	Transport, Mitochondrial	Cytosol, Mitochondria		Irreversible
ST6GALNAC61	sialytransferase 7 ((alpha-N-acetylneuraminyl 2,3-betagalactosyl-1,3)-N-acetyl galactosaminide alpha-2,6-sialytransferase) F	[g] : cmpacna + gd1a_hs --> cmp + gt1alpha_hs + h	Sphingolipid Metabolism	Golgi Apparatus		Irreversible
GHMT3	glycine hydroxymethyltransferase	[c] : 3htmelys + h --> 4tmeabut + gly	Lysine Metabolism	Cytosol	2.1.2.1	Irreversible
GHMT3m	glycine hydroxymethyltransferase, mitochondrial	[m] : 3htmelys + h --> 4tmeabut + gly	Lysine Metabolism	Mitochondria	2.1.2.1	Irreversible
PCLYSOX	Procollagen-lysine 1, 2-oxoglutarate 5-dioxygenase	[c] : akg + o2 + pcollglys --> co2 + pcollg5hlys + succ	Lysine Metabolism	Cytosol	1.14.11.4	Irreversible
S23T3g	beta-galactoside alpha-2,3-sialyltransferase (complex N-glycan)	[g] : cmpacna + l2fn2m2masn --> cmp + h + ksi_pre1	Keratan sulfate biosynthesis	Golgi Apparatus	2.4.99.6	Irreversible
AG13T4g	N-acetyllactosaminide beta-1,3-N-acetylglucosaminyltransferase, Golgi apparatus	[g] : ksi_pre1 + uacgam --> h + ksi_pre2 + udp	Keratan sulfate biosynthesis	Golgi Apparatus	2.4.1.149	Irreversible
PPOR	Phenylpyruvate:oxygen oxidoreductase (hydroxylating,decarboxylating)	[c] : o2 + phpyr --> 2hyoxplac + co2	Phenylalanine metabolism	Cytosol	1.13.11.27	Irreversible
C3STDH1Pr	C-3 sterol dehydrogenase (4-methylzymosterol)	[r] : 4mzym_int1 + nadp --> 4mzym_int2 + co2 + h + nadph	Cholesterol Metabolism	Endoplasmic Reticulum	5.3.3.1	Irreversible
C4STMO2Pr	C-4 methyl sterol oxidase	[r] : 4mzym_int2 + nadp + o2 --> co2 + h + nadph + zym_int2	Cholesterol Metabolism	Endoplasmic Reticulum		Irreversible
ALOX5	Arachidonate 5-lipoxygenase	[c] : arachd + o2 --> 5HPET	Eicosanoid Metabolism	Cytosol	1.13.11.34	Irreversible
ALOX12	Arachidonate 12-lipoxygenase	[c] : arachd + o2 --> 12HPET	Eicosanoid Metabolism	Cytosol	1.13.11.31	Irreversible
ALOX12R	Arachidonate 12-lipoxygenase R	[c] : arachd + o2 --> 12RHPET	Eicosanoid Metabolism	Cytosol	1.13.11.31	Irreversible
AG13T1g	N-acetyllactosaminide beta-1,3-N-acetylglucosaminyltransferase, Golgi apparatus	[g] : ksii_core2_pre2 + uacgam --> h + ksii_core2_pre3 + udp	Keratan sulfate biosynthesis	Golgi Apparatus	2.4.1.149	Irreversible
G14T3g	beta-N-acetylglucosaminylglycopeptide beta-1,4-galactosyltransferase, Golgi	[g] : ksii_core2_pre3 + udpgal --> h + ksii_core2_pre4 + udp	Keratan sulfate biosynthesis	Golgi Apparatus	2.4.1.38	Irreversible
AG13T2g	N-acetyllactosaminide beta-1,3-N-acetylglucosaminyltransferase, Golgi apparatus	[g] : ksii_core2_pre4 + uacgam --> h + ksii_core2_pre5 + udp	Keratan sulfate biosynthesis	Golgi Apparatus	2.4.1.149	Irreversible
S6T1g	galactose/N-acetylglucosamine 6-O-sulfotransferase, Golgi apparatus	[g] : ksii_core2_pre5 + paps --> h + ksii_core2_pre6 + pap	Keratan sulfate biosynthesis	Golgi Apparatus		Irreversible
G14T4g	beta-N-acetylglucosaminylglycopeptide beta-1,4-galactosyltransferase, Golgi	[g] : ksii_core2_pre6 + udpgal --> h + ksii_core2_pre7 + udp	Keratan sulfate biosynthesis	Golgi Apparatus	2.4.1.38	Irreversible
AG13T3g	N-acetyllactosaminide beta-1,3-N-acetylglucosaminyltransferase, Golgi apparatus	[g] : ksii_core2_pre7 + uacgam --> h + ksii_core2_pre8 + udp	Keratan sulfate biosynthesis	Golgi Apparatus	2.4.1.149	Irreversible
S6T2g	galactose/N-acetylglucosamine 6-O-sulfotransferase, Golgi apparatus	[g] : ksii_core2_pre8 + paps --> h + ksii_core2_pre9 + pap	Keratan sulfate biosynthesis	Golgi Apparatus		Irreversible
G14T5g	beta-N-acetylglucosaminylglycopeptide beta-1,4-galactosyltransferase, Golgi	[g] : ksii_core2_pre9 + udpgal --> h + ksii_core2_pre10 + udp	Keratan sulfate biosynthesis	Golgi Apparatus	2.4.1.38	Irreversible
S6T3g	galactose/N-acetylglucosamine 6-O-sulfotransferase, Golgi apparatus	[g] : ksii_core2_pre10 + paps --> h + ksii_core2 + pap	Keratan sulfate biosynthesis	Golgi Apparatus		Irreversible
HSD11B2r	11-beta-hydroxysteroid dehydrogenase type 2	[r] : cortsn + h + nadh <==> crtsl + nad	Steroid Metabolism	Endoplasmic Reticulum		Reversible
HSD11B1r	11-beta-hydroxysteroid dehydrogenase type 1	[r] : cortsn + h + nadph <==> crtsl + nadp	Steroid Metabolism	Endoplasmic Reticulum		Reversible
G14T6g	beta-N-acetylglucosaminylglycopeptide beta-1,4-galactosyltransferase, Golgi	[g] : ksi_pre2 + udpgal --> h + ksi_pre3 + udp	Keratan sulfate biosynthesis	Golgi Apparatus	2.4.1.38	Irreversible
AG13T5g	N-acetyllactosaminide beta-1,3-N-acetylglucosaminyltransferase, Golgi apparatus	[g] : ksi_pre3 + uacgam --> h + ksi_pre4 + udp	Keratan sulfate biosynthesis	Golgi Apparatus	2.4.1.149	Irreversible
S6T4g	galactose/N-acetylglucosamine 6-O-sulfotransferase, Golgi apparatus	[g] : ksi_pre4 + paps --> h + ksi_pre5 + pap	Keratan sulfate biosynthesis	Golgi Apparatus		Irreversible
G14T7g	beta-N-acetylglucosaminylglycopeptide beta-1,4-galactosyltransferase, Golgi	[g] : ksi_pre5 + udpgal --> h + ksi_pre6 + udp	Keratan sulfate biosynthesis	Golgi Apparatus	2.4.1.38	Irreversible
AG13T6g	N-acetyllactosaminide beta-1,3-N-acetylglucosaminyltransferase, Golgi apparatus	[g] : ksi_pre6 + uacgam --> h + ksi_pre7 + udp	Keratan sulfate biosynthesis	Golgi Apparatus	2.4.1.149	Irreversible
AG13T7g	N-acetyllactosaminide beta-1,3-N-acetylglucosaminyltransferase, Golgi apparatus	[g] : ksi_pre9 + uacgam --> h + ksi_pre10 + udp	Keratan sulfate biosynthesis	Golgi Apparatus	2.4.1.149	Irreversible
AG13T8g	N-acetyllactosaminide beta-1,3-N-acetylglucosaminyltransferase, Golgi apparatus	[g] : ksi_pre12 + uacgam --> h + ksi_pre13 + udp	Keratan sulfate biosynthesis	Golgi Apparatus	2.4.1.149	Irreversible
AG13T9g	N-acetyllactosaminide beta-1,3-N-acetylglucosaminyltransferase, Golgi apparatus	[g] : ksi_pre15 + uacgam --> h + ksi_pre16 + udp	Keratan sulfate biosynthesis	Golgi Apparatus	2.4.1.149	Irreversible
AG13T10g	N-acetyllactosaminide beta-1,3-N-acetylglucosaminyltransferase, Golgi apparatus	[g] : ksi_pre18 + uacgam --> h + ksi_pre19 + udp	Keratan sulfate biosynthesis	Golgi Apparatus	2.4.1.149	Irreversible
AG13T11g	N-acetyllactosaminide beta-1,3-N-acetylglucosaminyltransferase, Golgi apparatus	[g] : ksi_pre21 + uacgam --> h + ksi_pre22 + udp	Keratan sulfate biosynthesis	Golgi Apparatus	2.4.1.149	Irreversible
AG13T12g	N-acetyllactosaminide beta-1,3-N-acetylglucosaminyltransferase, Golgi apparatus	[g] : ksi_pre24 + uacgam --> h + ksi_pre25 + udp	Keratan sulfate biosynthesis	Golgi Apparatus	2.4.1.149	Irreversible
AG13T13g	N-acetyllactosaminide beta-1,3-N-acetylglucosaminyltransferase, Golgi apparatus	[g] : ksi_pre27 + uacgam --> h + ksi_pre28 + udp	Keratan sulfate biosynthesis	Golgi Apparatus	2.4.1.149	Irreversible
AG13T14g	N-acetyllactosaminide beta-1,3-N-acetylglucosaminyltransferase, Golgi apparatus	[g] : ksi_pre30 + uacgam --> h + ksi_pre31 + udp	Keratan sulfate biosynthesis	Golgi Apparatus	2.4.1.149	Irreversible
AG13T15g	N-acetyllactosaminide beta-1,3-N-acetylglucosaminyltransferase, Golgi apparatus	[g] : ksi_pre33 + uacgam --> h + ksi_pre34 + udp	Keratan sulfate biosynthesis	Golgi Apparatus	2.4.1.149	Irreversible
G14T8g	beta-N-acetylglucosaminylglycopeptide beta-1,4-galactosyltransferase, Golgi	[g] : ksi_pre8 + udpgal --> h + ksi_pre9 + udp	Keratan sulfate biosynthesis	Golgi Apparatus	2.4.1.38	Irreversible
G14T9g	beta-N-acetylglucosaminylglycopeptide beta-1,4-galactosyltransferase, Golgi	[g] : ksi_pre11 + udpgal --> h + ksi_pre12 + udp	Keratan sulfate biosynthesis	Golgi Apparatus	2.4.1.38	Irreversible
G14T10g	beta-N-acetylglucosaminylglycopeptide beta-1,4-galactosyltransferase, Golgi	[g] : ksi_pre14 + udpgal --> h + ksi_pre15 + udp	Keratan sulfate biosynthesis	Golgi Apparatus	2.4.1.38	Irreversible
G14T11g	beta-N-acetylglucosaminylglycopeptide beta-1,4-galactosyltransferase, Golgi	[g] : ksi_pre17 + udpgal --> h + ksi_pre18 + udp	Keratan sulfate biosynthesis	Golgi Apparatus	2.4.1.38	Irreversible
G14T12g	beta-N-acetylglucosaminylglycopeptide beta-1,4-galactosyltransferase, Golgi	[g] : ksi_pre20 + udpgal --> h + ksi_pre21 + udp	Keratan sulfate biosynthesis	Golgi Apparatus	2.4.1.38	Irreversible
G14T13g	beta-N-acetylglucosaminylglycopeptide beta-1,4-galactosyltransferase, Golgi	[g] : ksi_pre23 + udpgal --> h + ksi_pre24 + udp	Keratan sulfate biosynthesis	Golgi Apparatus	2.4.1.38	Irreversible
G14T14g	beta-N-acetylglucosaminylglycopeptide beta-1,4-galactosyltransferase, Golgi	[g] : ksi_pre26 + udpgal --> h + ksi_pre27 + udp	Keratan sulfate biosynthesis	Golgi Apparatus	2.4.1.38	Irreversible
G14T15g	beta-N-acetylglucosaminylglycopeptide beta-1,4-galactosyltransferase, Golgi	[g] : ksi_pre29 + udpgal --> h + ksi_pre30 + udp	Keratan sulfate biosynthesis	Golgi Apparatus	2.4.1.38	Irreversible
G14T16g	beta-N-acetylglucosaminylglycopeptide beta-1,4-galactosyltransferase, Golgi	[g] : ksi_pre32 + udpgal --> h + ksi_pre33 + udp	Keratan sulfate biosynthesis	Golgi Apparatus	2.4.1.38	Irreversible
G14T17g	beta-N-acetylglucosaminylglycopeptide beta-1,4-galactosyltransferase, Golgi	[g] : ksi_pre35 + udpgal --> h + ksi_pre36 + udp	Keratan sulfate biosynthesis	Golgi Apparatus	2.4.1.38	Irreversible
S6T5g	galactose/N-acetylglucosamine 6-O-sulfotransferase, Golgi apparatus	[g] : ksi_pre7 + paps --> h + ksi_pre8 + pap	Keratan sulfate biosynthesis	Golgi Apparatus		Irreversible
S6T6g	galactose/N-acetylglucosamine 6-O-sulfotransferase, Golgi apparatus	[g] : ksi_pre10 + paps --> h + ksi_pre11 + pap	Keratan sulfate biosynthesis	Golgi Apparatus		Irreversible
S6T7g	galactose/N-acetylglucosamine 6-O-sulfotransferase, Golgi apparatus	[g] : ksi_pre13 + paps --> h + ksi_pre14 + pap	Keratan sulfate biosynthesis	Golgi Apparatus		Irreversible
S6T8g	galactose/N-acetylglucosamine 6-O-sulfotransferase, Golgi apparatus	[g] : ksi_pre16 + paps --> h + ksi_pre17 + pap	Keratan sulfate biosynthesis	Golgi Apparatus		Irreversible
S6T9g	galactose/N-acetylglucosamine 6-O-sulfotransferase, Golgi apparatus	[g] : ksi_pre19 + paps --> h + ksi_pre20 + pap	Keratan sulfate biosynthesis	Golgi Apparatus		Irreversible
S6T10g	galactose/N-acetylglucosamine 6-O-sulfotransferase, Golgi apparatus	[g] : ksi_pre22 + paps --> h + ksi_pre23 + pap	Keratan sulfate biosynthesis	Golgi Apparatus		Irreversible
S6T11g	galactose/N-acetylglucosamine 6-O-sulfotransferase, Golgi apparatus	[g] : ksi_pre25 + paps --> h + ksi_pre26 + pap	Keratan sulfate biosynthesis	Golgi Apparatus		Irreversible
S6T12g	galactose/N-acetylglucosamine 6-O-sulfotransferase, Golgi apparatus	[g] : ksi_pre28 + paps --> h + ksi_pre29 + pap	Keratan sulfate biosynthesis	Golgi Apparatus		Irreversible
S6T13g	galactose/N-acetylglucosamine 6-O-sulfotransferase, Golgi apparatus	[g] : ksi_pre31 + paps --> h + ksi_pre32 + pap	Keratan sulfate biosynthesis	Golgi Apparatus		Irreversible
S6T14g	galactose/N-acetylglucosamine 6-O-sulfotransferase, Golgi apparatus	[g] : ksi_pre34 + paps --> h + ksi_pre35 + pap	Keratan sulfate biosynthesis	Golgi Apparatus		Irreversible
S6T15g	galactose/N-acetylglucosamine 6-O-sulfotransferase, Golgi apparatus	[g] : ksi_pre36 + paps --> h + ksi + pap	Keratan sulfate biosynthesis	Golgi Apparatus		Irreversible
3SPYRSP	3-sulfinopyruvate hydrolase (spotaneous reaction)	[c] : 3snpyr + h2o --> h + pyr + so3	Cysteine Metabolism	Cytosol		Irreversible
ARGDCm	arginine decarboxylase (m)	[m] : arg-L + h --> agm + co2	Arginine and Proline Metabolism	Mitochondria	4.1.1.19	Irreversible
AASAD3m	L-aminoadipate-semialdehyde dehydrogenase (NADH), mitochondrial	[m] : L2aadp6sa + h2o + nad --> L2aadp + (2) h + nadh	Lysine Metabolism	Mitochondria	1.2.1.31	Irreversible
SEASMETtn	Se-adenosyl-seleno-L-methionine nuclear transport	seasmet[c] <==> seasmet[n]	Selenoamino acid metabolism	Cytosol, Nucleus		Reversible
SEAHCYStn	Se-adenosyl-seleno-L-homocysteine nuclear transport	seahcys[c] <==> seahcys[n]	Selenoamino acid metabolism	Cytosol, Nucleus		Reversible
DALAOXx	D-Alanine Oxidase (x)	[x] : ala-D + h2o + o2 --> h2o2 + nh4 + pyr	D-alanine metabolism	Peroxisome	1.4.3.3	Irreversible
DALAxt	D-Alanine transport to perixosome	ala-D[c] --> ala-D[x]	D-alanine metabolism	Cytosol, Peroxisome		Irreversible
TAURtcx	taurine transport (sodium symport) (cytosol to peroxisome)	na1[c] + taur[c] <==> na1[x] + taur[x]	Taurine and hypotaurine metabolism	Cytosol, Peroxisome		Reversible
G14T18g	beta-N-acetylglucosaminylglycopeptide beta-1,4-galactosyltransferase, Golgi	[g] : core4 + (2) udpgal --> (2) h + ksii_core4_pre1 + (2) udp	Keratan sulfate biosynthesis	Golgi Apparatus	2.4.1.38	Irreversible
S23T4g	beta-galactoside alpha-2,3-sialyltransferase	[g] : cmpacna + ksii_core4_pre1 --> cmp + h + ksii_core4_pre2	Keratan sulfate biosynthesis	Golgi Apparatus	2.4.99.4	Irreversible
AG13T16g	N-acetyllactosaminide beta-1,3-N-acetylglucosaminyltransferase, Golgi apparatus	[g] : ksii_core4_pre2 + uacgam --> h + ksii_core4_pre3 + udp	Keratan sulfate biosynthesis	Golgi Apparatus	2.4.1.149	Irreversible
G14T19g	beta-N-acetylglucosaminylglycopeptide beta-1,4-galactosyltransferase, Golgi	[g] : ksii_core4_pre3 + udpgal --> h + ksii_core4_pre4 + udp	Keratan sulfate biosynthesis	Golgi Apparatus	2.4.1.38	Irreversible
AG13T17g	N-acetyllactosaminide beta-1,3-N-acetylglucosaminyltransferase, Golgi apparatus	[g] : ksii_core4_pre4 + uacgam --> h + ksii_core4_pre5 + udp	Keratan sulfate biosynthesis	Golgi Apparatus	2.4.1.149	Irreversible
S6T16g	galactose/N-acetylglucosamine 6-O-sulfotransferase, Golgi apparatus	[g] : ksii_core4_pre5 + paps --> h + ksii_core4_pre6 + pap	Keratan sulfate biosynthesis	Golgi Apparatus		Irreversible
G14T20g	beta-N-acetylglucosaminylglycopeptide beta-1,4-galactosyltransferase, Golgi	[g] : ksii_core4_pre6 + udpgal --> h + ksii_core4_pre7 + udp	Keratan sulfate biosynthesis	Golgi Apparatus	2.4.1.38	Irreversible
AG13T18g	N-acetyllactosaminide beta-1,3-N-acetylglucosaminyltransferase, Golgi apparatus	[g] : ksii_core4_pre7 + uacgam --> h + ksii_core4_pre8 + udp	Keratan sulfate biosynthesis	Golgi Apparatus	2.4.1.149	Irreversible
S6T17g	galactose/N-acetylglucosamine 6-O-sulfotransferase, Golgi apparatus	[g] : ksii_core4_pre8 + paps --> h + ksii_core4_pre9 + pap	Keratan sulfate biosynthesis	Golgi Apparatus		Irreversible
G14T21g	beta-N-acetylglucosaminylglycopeptide beta-1,4-galactosyltransferase, Golgi	[g] : ksii_core4_pre9 + udpgal --> h + ksii_core4_pre10 + udp	Keratan sulfate biosynthesis	Golgi Apparatus	2.4.1.38	Irreversible
S6T18g	galactose/N-acetylglucosamine 6-O-sulfotransferase, Golgi apparatus	[g] : ksii_core4_pre10 + paps --> h + ksii_core4 + pap	Keratan sulfate biosynthesis	Golgi Apparatus		Irreversible
XYLTer	UDP-xylose:protein xylosyltransferase, endoplasmic reticulum	[r] : Ser-Gly/Ala-X-Gly + udpxyl --> h + udp + xser	Chondroitin / heparan sulfate biosynthesis	Endoplasmic Reticulum	2.4.2.26	Irreversible
GALTg	UDP-D-galactose:D-xylose galactosyltransferase, Golgi apparatus	[g] : udpgal + xser --> h + lxser + udp	Chondroitin / heparan sulfate biosynthesis	Golgi Apparatus	2.4.1.133	Irreversible
GALT2g	UDP-D-galactose:galactosylxylose galactosyltransferase, Golgi apparatus	[g] : lxser + udpgal --> h + l2xser + udp	Chondroitin / heparan sulfate biosynthesis	Golgi Apparatus	2.4.1.134	Irreversible
GLCATg	UDP-D-glucuronate:galactosylgalactosylxylose glucuronosyltransferase, Golgi apparatus	[g] : l2xser + udpglcur --> cs,hs_linkage + h + udp	Chondroitin / heparan sulfate biosynthesis	Golgi Apparatus	2.4.1.135	Irreversible
GALNACT1g	UDPGal-chondroitin acetylgalactosaminyltransferase I, Golgi	[g] : cs,hs_linkage + udpacgal --> cs_pre + h + udp	Chondroitin / heparan sulfate biosynthesis	Golgi Apparatus	2.4.1.174	Irreversible
S4T1g	chondroitin 4-sulfotransferase, Golgi apparatus	[g] : cs_pre + (2) paps --> cs_a,b,e_pre1 + (2) h + (2) pap	Chondroitin / heparan sulfate biosynthesis	Golgi Apparatus	2.8.2.5	Irreversible
GLCAT2g	chondroitin glucuronyltransferase II, Golgi apparatus	[g] : cs_a,b,e_pre1 + udpglcur --> cs_a,b_pre2 + h + udp	Chondroitin / heparan sulfate biosynthesis	Golgi Apparatus		Irreversible
GALNACT2g	uridine diphosphoacetylgalactosamine-chondroitin acetylgalactosaminyltransferase II, Golgi	[g] : cs_a,b_pre2 + uacgam --> cs_a,b_pre3 + h + udp	Chondroitin / heparan sulfate biosynthesis	Golgi Apparatus	2.4.1.175	Irreversible
S4T2g	chondroitin 4-sulfotransferase, Golgi apparatus	[g] : cs_a,b_pre3 + paps --> cspg_a + h + pap	Chondroitin / heparan sulfate biosynthesis	Golgi Apparatus	2.8.2.5	Irreversible
S6T19g	chondroitin 6-sulfotransferase, Golgi apparatus	[g] : cs_pre + (2) paps --> cs_c,d,e_pre1 + (2) h + (2) pap	Chondroitin / heparan sulfate biosynthesis	Golgi Apparatus	2.8.2.17	Irreversible
GLCAT3g	chondroitin glucuronyltransferase II, Golgi apparatus	[g] : cs_c,d,e_pre1 + udpglcur --> cs_c_pre2 + h + udp	Chondroitin / heparan sulfate biosynthesis	Golgi Apparatus		Irreversible
GALNACT3g	uridine diphosphoacetylgalactosamine-chondroitin acetylgalactosaminyltransferase II, Golgi	[g] : cs_c_pre2 + uacgam --> cs_c_pre3 + h + udp	Chondroitin / heparan sulfate biosynthesis	Golgi Apparatus	2.4.1.175	Irreversible
S6T20g	chondroitin 6-sulfotransferase, Golgi apparatus	[g] : cs_c_pre3 + paps --> cspg_c + h + pap	Chondroitin / heparan sulfate biosynthesis	Golgi Apparatus	2.8.2.17	Irreversible
S2T1g	chondroitin 2-sulfotransferase, Golgi	[g] : cs_c,d,e_pre1 + paps --> cs_d_pre2 + h + pap	Chondroitin / heparan sulfate biosynthesis	Golgi Apparatus		Irreversible
GLCAT4g	chondroitin glucuronyltransferase II, Golgi apparatus	[g] : cs_d_pre2 + udpglcur --> cs_d_pre3 + h + udp	Chondroitin / heparan sulfate biosynthesis	Golgi Apparatus		Irreversible
GALNACT4g	uridine diphosphoacetylgalactosamine-chondroitin acetylgalactosaminyltransferase II, Golgi	[g] : cs_d_pre3 + uacgam --> cs_d_pre4 + h + udp	Chondroitin / heparan sulfate biosynthesis	Golgi Apparatus	2.4.1.175	Irreversible
S6T21g	chondroitin 6-sulfotransferase, Golgi apparatus	[g] : cs_d_pre4 + paps --> cs_d_pre5 + h + pap	Chondroitin / heparan sulfate biosynthesis	Golgi Apparatus	2.8.2.17	Irreversible
S2T2g	chondroitin 2-sulfotransferase, Golgi	[g] : cs_d_pre5 + paps --> cspg_d + h + pap	Chondroitin / heparan sulfate biosynthesis	Golgi Apparatus		Irreversible
ETF	electron transfer flavoprotein	[m] : etfox + fadh2 --> etfrd + fad	Fatty acid oxidation	Mitochondria		Irreversible
ETFQO	Electron transfer flavoprotein-ubiquinone oxidoreductase	[m] : etfrd + q10 --> etfox + q10h2	Fatty acid oxidation	Mitochondria	1.5.5.1	Irreversible
34DHXMANDACOX	3,4-Dihydroxymandelaldehyde:NAD+ oxidoreductase	[c] : 34dhmald + h2o + nad --> 34dhoxmand + (2) h + nadh	Tyrosine metabolism	Cytosol	1.2.1.5	Irreversible
34DHPLACOX	3,4-Dihydroxyphenylacetaldehyde:NAD+ oxidoreductase	[c] : 34dhpac + h2o + nad --> 34dhpha + (2) h + nadh	Tyrosine metabolism	Cytosol	1.2.1.5	Irreversible
P4504F121r	cytochrome p450 4F12/4F2	[r] : arachd + h + nadph + o2 --> h2o + nadp + wharachd	Eicosanoid Metabolism	Endoplasmic Reticulum		Irreversible
P4504F122r	cytochrome p450 4F12/4F2	[r] : h + leuktrB4 + nadph + o2 --> h2o + leuktrB4woh + nadp	Eicosanoid Metabolism	Endoplasmic Reticulum		Irreversible
P4504F123r	cytochrome p450 4F12/4F2	[r] : ebastine + h + nadph + o2 --> ebastineoh + h2o + nadp	CYP Metabolism	Endoplasmic Reticulum		Irreversible
P4504F81r	cytochrome p450 4F8	[r] : arachd + h + nadph + o2 --> 18harachd + h2o + nadp	Eicosanoid Metabolism	Endoplasmic Reticulum		Irreversible
S6T22g	chondroitin 6-sulfotransferase, Golgi apparatus	[g] : cs_a,b,e_pre1 + (2) paps --> cs_e_pre2 + (2) h + (2) pap	Chondroitin / heparan sulfate biosynthesis	Golgi Apparatus	2.8.2.17	Irreversible
GLCAT5g	chondroitin glucuronyltransferase II, Golgi apparatus	[g] : cs_e_pre2 + udpglcur --> cs_e_pre3 + h + udp	Chondroitin / heparan sulfate biosynthesis	Golgi Apparatus		Irreversible
GALNACT5g	uridine diphosphoacetylgalactosamine-chondroitin acetylgalactosaminyltransferase II, Golgi	[g] : cs_e_pre3 + uacgam --> cs_e_pre4 + h + udp	Chondroitin / heparan sulfate biosynthesis	Golgi Apparatus	2.4.1.175	Irreversible
S4T3g	chondroitin 4-sulfotransferase, Golgi apparatus	[g] : cs_e_pre4 + paps --> cs_e_pre5a + h + pap	Chondroitin / heparan sulfate biosynthesis	Golgi Apparatus	2.8.2.5	Irreversible
S6T23g	chondroitin 6-sulfotransferase, Golgi apparatus	[g] : cs_e_pre5a + paps --> cspg_e + h + pap	Chondroitin / heparan sulfate biosynthesis	Golgi Apparatus	2.8.2.17	Irreversible
3MOX4HOXPGALDOX	3-Methoxy-4-hydroxyphenylglycolaldehyde:NAD+ oxidoreductase	[c] : 3m4hpga + h2o + nad --> 3mox4hoxm + (2) h + nadh	Tyrosine metabolism	Cytosol	1.2.1.5	Irreversible
S4T4g	chondroitin 4-sulfotransferase, Golgi apparatus	[g] : cs_c,d,e_pre1 + (2) paps --> cs_e_pre2 + (2) h + (2) pap	Chondroitin / heparan sulfate biosynthesis	Golgi Apparatus	2.8.2.5	Irreversible
S4T5g	chondroitin 4-sulfotransferase, Golgi apparatus	[g] : cs_e_pre5b + paps --> cspg_e + h + pap	Chondroitin / heparan sulfate biosynthesis	Golgi Apparatus	2.8.2.5	Irreversible
S6T24g	chondroitin 6-sulfotransferase, Golgi apparatus	[g] : cs_e_pre4 + paps --> cs_e_pre5b + h + pap	Chondroitin / heparan sulfate biosynthesis	Golgi Apparatus	2.8.2.17	Irreversible
TYRCBOX	L-Tyrosine carboxy-lyase	[c] : h + tyr-L --> co2 + tym	Tyrosine metabolism	Cytosol	4.1.1.25	Irreversible
S4T6g	chondroitin 4-sulfotransferase, Golgi apparatus	[g] : cs_b_pre4 + paps --> cs_b_pre5 + h + pap	Chondroitin / heparan sulfate biosynthesis	Golgi Apparatus	2.8.2.5	Irreversible
S2T3g	uronyl 2-sulfotransferase, Golgi	[g] : cs_b_pre5 + paps --> cspg_b + h + pap	Chondroitin / heparan sulfate biosynthesis	Golgi Apparatus		Irreversible
TYROXDAc	Tyramine:oxygen oxidoreductase(deaminating)(flavin-containing) (cytosol)	[c] : h2o + o2 + tym --> 4hoxpacd + h2o2 + nh4	Tyrosine metabolism	Cytosol	1.4.3.6	Irreversible
P4504B1r	cytochrome P450 4B1	[r] : arachd + h + nadph + o2 --> 12harachd + h2o + nadp	Eicosanoid Metabolism	Endoplasmic Reticulum	1.14.14.1	Irreversible
KYNATESYN	4-(2-Aminophenyl)-2,4-dioxobutanoate dehydratase	[c] : 4aphdob --> h2o + kynate	Tryptophan metabolism	Cytosol		Irreversible
GLCAT6g	heparan glucuronyltransferase II	[g] : hs_pre1 + udpglcur --> h + hs_pre2 + udp	Chondroitin / heparan sulfate biosynthesis	Golgi Apparatus		Irreversible
GLCNACT2g	alpha-N-acetylglucosaminyltransferase II	[g] : hs_pre2 + uacgam --> h + hs_pre3 + udp	Chondroitin / heparan sulfate biosynthesis	Golgi Apparatus		Irreversible
GLCNACT3g	alpha-N-acetylglucosaminyltransferase II	[g] : hs_pre4 + uacgam --> h + hs_pre5 + udp	Chondroitin / heparan sulfate biosynthesis	Golgi Apparatus		Irreversible
GLCNACT4g	alpha-N-acetylglucosaminyltransferase II	[g] : hs_pre6 + uacgam --> h + hs_pre7 + udp	Chondroitin / heparan sulfate biosynthesis	Golgi Apparatus		Irreversible
GLCNACT5g	alpha-N-acetylglucosaminyltransferase II	[g] : hs_pre8 + uacgam --> h + hs_pre9 + udp	Chondroitin / heparan sulfate biosynthesis	Golgi Apparatus		Irreversible
GLCAT7g	heparan glucuronyltransferase II	[g] : hs_pre3 + udpglcur --> h + hs_pre4 + udp	Chondroitin / heparan sulfate biosynthesis	Golgi Apparatus		Irreversible
GLCAT8g	heparan glucuronyltransferase II	[g] : hs_pre5 + udpglcur --> h + hs_pre6 + udp	Chondroitin / heparan sulfate biosynthesis	Golgi Apparatus		Irreversible
GLCAT9g	heparan glucuronyltransferase II	[g] : hs_pre7 + udpglcur --> h + hs_pre8 + udp	Chondroitin / heparan sulfate biosynthesis	Golgi Apparatus		Irreversible
GLCNACDASg	GlcNAc N-deacetylase / N-sulfotransferase	[g] : (4) h2o + hs_pre9 + (4) paps --> (4) ac + (4) h + hs_pre10 + (4) pap	Chondroitin / heparan sulfate biosynthesis	Golgi Apparatus		Irreversible
GLCAE1g	chondroitin-glucuronate 5-epimerase	[g] : cs_a,b_pre3 --> cs_b_pre4	Chondroitin / heparan sulfate biosynthesis	Golgi Apparatus	5.1.3.19	Irreversible
GLCAE2g	heparosan-N-sulfate-glucuronate 5-epimerase	[g] : hs_pre10 --> hs_pre11	Chondroitin / heparan sulfate biosynthesis	Golgi Apparatus	5.1.3.17	Irreversible
S2T4g	uronyl 2-sulfotransferase, Golgi	[g] : hs_pre11 + (2) paps --> (2) h + hs_pre12 + (2) pap	Chondroitin / heparan sulfate biosynthesis	Golgi Apparatus		Irreversible
S6T25g	heparan sulfate 6-sulfotransferase, Golgi apparatus	[g] : hs_pre12 + (3) paps --> (3) h + hs_pre13 + (3) pap	Chondroitin / heparan sulfate biosynthesis	Golgi Apparatus		Irreversible
PHACCOAGLNAC	Phenylacetyl-CoA:L-glutamine alpha-N-phenylacetyltransferase	[c] : gln-L + phaccoa --> coa + pheacgln	Phenylalanine metabolism	Cytosol	2.3.1.14	Irreversible
GTPCIn	GTP cyclohydrolase I, nuclear	[n] : gtp + h2o --> ahdt + for + h	Tetrahydrobiopterin	Nucleus	3.5.4.16	Irreversible
PTHPSn	6-pyruvoyltetrahydropterin synthase, nuclear	[n] : ahdt --> 6pthp + pppi	Tetrahydrobiopterin	Nucleus	4.2.3.12	Irreversible
SPR	sepiapterin reductase	[c] : 6pthp + (2) h + (2) nadph --> (2) nadp + thbpt	Tetrahydrobiopterin	Cytosol	1.1.1.153	Irreversible
P4503A7r	cytochrome p450 P450 3A7	[r] : h + nadph + o2 + tststerone --> 6htststerone + h2o + nadp	Steroid Metabolism	Endoplasmic Reticulum		Irreversible
P4503A43r	cytochrome p450 P450 3A43	[r] : h + nadph + o2 + tststerone --> h2o + nadp + whtststerone	Steroid Metabolism	Endoplasmic Reticulum		Irreversible
P4503A5	cytochrome P450 3A5	[c] : aflatoxin + h + nadph + o2 --> eaflatoxin + h2o + nadp	CYP Metabolism	Cytosol		Irreversible
P4503A4	cytochrome P450 3A4	[c] : h + nadph + nifedipine + o2 --> h2o + hnifedipine + nadp	CYP Metabolism	Cytosol		Irreversible
P4502F1	cytochrome P450 2F1	[c] : h + nadph + npthl + o2 --> h2o + nadp + onpthl	CYP Metabolism	Cytosol		Irreversible
P4502E1	cytochrome P450 2E1	[c] : 4nph + h + nadph + o2 --> 24nph + h2o + nadp	CYP Metabolism	Cytosol		Irreversible
P4502D6	cytochrome P450 2D6	[c] : debrisoquine + h + nadph + o2 --> 4hdebrisoquine + h2o + nadp	CYP Metabolism	Cytosol		Irreversible
P4502C19	cytochrome P450 2C19	[c] : h + nadph + o2 + omeprazole --> 5homeprazole + h2o + nadp	CYP Metabolism	Cytosol		Irreversible
P4502C18	cytochrome P450 2C18	[c] : antipyrene + h + nadph + (0.5) o2 --> dmantipyrine + meoh + nadp	CYP Metabolism	Cytosol		Irreversible
P4502C9	cytochrome P450 2C9	[c] : h + nadph + o2 + tolbutamide --> 4mtolbutamide + h2o + nadp	CYP Metabolism	Cytosol		Irreversible
P4502C8	cytochrome P450 2C8	[c] : h + nadph + o2 + taxol --> h2o + htaxol + nadp	CYP Metabolism	Cytosol		Irreversible
P4502A6	cytochrome P450 2A6	[c] : coumarin + h + nadph + o2 --> h2o + hcoumarin + nadp	CYP Metabolism	Cytosol		Irreversible
P4501B1r	cytochrome P450 1B1	[r] : estradiol + h + nadph + o2 --> h2o + hestratriol + nadp	Steroid Metabolism	Endoplasmic Reticulum	1.14.14.1	Irreversible
S3T1g	heparin-glucosamine 3-O-sulfotransferase	[g] : hs_pre13 + paps --> h + hs_pre14 + pap	Chondroitin / heparan sulfate biosynthesis	Golgi Apparatus	2.8.2.23	Irreversible
S3T2g	heparin-glucosamine 3-O-sulfotransferase	[g] : hs_pre14 + paps --> h + hs_pre15 + pap	Chondroitin / heparan sulfate biosynthesis	Golgi Apparatus	2.8.2.23	Irreversible
S3T3g	heparin-glucosamine 3-O-sulfotransferase	[g] : hs_pre15 + paps --> h + hspg + pap	Chondroitin / heparan sulfate biosynthesis	Golgi Apparatus	2.8.2.23	Irreversible
ALAt2rL	L-alanine reversible transport via proton symport (lysosome)	ala-L[l] + h[l] <==> ala-L[c] + h[c]	Transport, Lysosomal	Cytosol, Lysosome		Reversible
PROt2rL	L-proline reversible transport via proton symport (lysosome)	h[l] + pro-L[l] <==> h[c] + pro-L[c]	Transport, Lysosomal	Cytosol, Lysosome		Reversible
GLYt2rL	glycine reversible transport via proton symport (lysosome)	gly[l] + h[l] <==> gly[c] + h[c]	Transport, Lysosomal	Cytosol, Lysosome		Reversible
DALAt2rL	D-alanine transport via proton symport (lysosome)	ala-D[l] + h[l] <==> ala-D[c] + h[c]	Transport, Lysosomal	Cytosol, Lysosome		Reversible
PRODt2rL	D-proline reversible transport via proton symport (lysosome)	h[l] + pro-D[l] <==> h[c] + pro-D[c]	Transport, Lysosomal	Cytosol, Lysosome		Reversible
ABUTt2rL	4-aminobutyrate reversible transport in via proton symport (lysosome)	4abut[l] + h[l] <==> 4abut[c] + h[c]	Transport, Lysosomal	Cytosol, Lysosome		Reversible
DMGDHm	dimethylglycine dehydrogenase, mitochondrial	[m] : dmgly + fad + h2o --> fadh2 + fald + sarcs	Glycine, Serine, and Threonine Metabolism	Mitochondria	1.5.99.2	Irreversible
AACTOOR	Aminoacetone:oxygen oxidoreductase(deaminating)(flavin-containing)	[c] : aact + h2o + o2 --> h2o2 + mthgxl + nh4	Glycine, Serine, and Threonine Metabolism	Cytosol		Irreversible
GLCNACASE1ly	alpha-N-acetylglucosaminidase, lysosomal	[l] : h2o + hs_deg3 --> acgam + hs_deg4	Heparan sulfate degradation	Lysosome	3.2.1.50	Irreversible
IDOAASE1ly	alpha-L-iduronidase, lysosomal	[l] : h2o + hs_deg4 --> hs_deg5 + idour	Heparan sulfate degradation	Lysosome	3.2.1.76	Irreversible
GLCNACASE2ly	alpha-N-acetylglucosaminidase, lysosomal	[l] : h2o + hs_deg8 --> acgam + hs_deg9	Heparan sulfate degradation	Lysosome	3.2.1.50	Irreversible
GLCAASE1ly	beta-glucuronidase, lysosomal	[l] : h2o + hs_deg9 --> glcur + hs_deg10	Heparan sulfate degradation	Lysosome	3.2.1.31	Irreversible
GLCNACASE3ly	alpha-N-acetylglucosaminidase, lysosomal	[l] : h2o + hs_deg14 --> acgam + hs_deg15	Heparan sulfate degradation	Lysosome	3.2.1.50	Irreversible
GLCNACASE4ly	alpha-N-acetylglucosaminidase, lysosomal	[l] : h2o + hs_deg20 --> acgam + hs_deg21	Heparan sulfate degradation	Lysosome	3.2.1.50	Irreversible
S2TASE1ly	iduronate-2-sulfatase, lysosomal	[l] : h2o + hs_deg15 --> h + hs_deg16 + so4	Heparan sulfate degradation	Lysosome	3.1.6.13	Irreversible
S2TASE2ly	iduronate-2-sulfatase, lysosomal	[l] : h2o + hs_deg21 --> h + hs_deg22 + so4	Heparan sulfate degradation	Lysosome	3.1.6.13	Irreversible
IDOAASE2ly	alpha-L-iduronidase, lysosomal	[l] : h2o + hs_deg16 --> hs_deg17 + idour	Heparan sulfate degradation	Lysosome	3.2.1.76	Irreversible
IDOAASE3ly	alpha-L-iduronidase, lysosomal	[l] : h2o + hs_deg22 --> hs_deg23 + idour	Heparan sulfate degradation	Lysosome	3.2.1.76	Irreversible
FPGS	folylpolyglutamate synthetase	[c] : (4) atp + (4) glu-L + thf --> 5thf + (4) adp + (4) h + (4) pi	Folate Metabolism	Cytosol	6.3.2.17	Irreversible
FPGS2	folylpolyglutamate synthetase	[c] : 5thf + atp + glu-L --> 6thf + adp + h + pi	Folate Metabolism	Cytosol	6.3.2.17	Irreversible
FPGS3	folylpolyglutamate synthetase	[c] : 6thf + atp + glu-L --> 7thf + adp + h + pi	Folate Metabolism	Cytosol	6.3.2.17	Irreversible
FPGSm	folylpolyglutamate synthetase, mitochondrial	[m] : (4) atp + (4) glu-L + thf --> 5thf + (4) adp + (4) h + (4) pi	Folate Metabolism	Mitochondria	6.3.2.17	Irreversible
FPGS2m	folylpolyglutamate synthetase, mitochondrial	[m] : 5thf + atp + glu-L --> 6thf + adp + h + pi	Folate Metabolism	Mitochondria	6.3.2.17	Irreversible
FPGS3m	folylpolyglutamate synthetase, mitochondrial	[m] : 6thf + atp + glu-L --> 7thf + adp + h + pi	Folate Metabolism	Mitochondria	6.3.2.17	Irreversible
FPGS4	folylpolyglutamate synthetase (DHF)	[c] : (4) atp + dhf + (4) glu-L --> 5dhf + (4) adp + (4) h + (4) pi	Folate Metabolism	Cytosol	6.3.2.17	Irreversible
FPGS5	folylpolyglutamate synthetase (DHF)	[c] : 5dhf + atp + glu-L --> 6dhf + adp + h + pi	Folate Metabolism	Cytosol	6.3.2.17	Irreversible
FPGS6	folylpolyglutamate synthetase (DHF)	[c] : 6dhf + atp + glu-L --> 7dhf + adp + h + pi	Folate Metabolism	Cytosol	6.3.2.17	Irreversible
FPGS7	folylpolyglutamate synthetase (10fthf)	[c] : 10fthf + (4) atp + (4) glu-L --> 10fthf5glu + (4) adp + (4) h + (4) pi	Folate Metabolism	Cytosol	6.3.2.17	Irreversible
FPGS8	folylpolyglutamate synthetase (10fthf)	[c] : 10fthf5glu + atp + glu-L --> 10fthf6glu + adp + h + pi	Folate Metabolism	Cytosol	6.3.2.17	Irreversible
FPGS9	folylpolyglutamate synthetase (10fthf)	[c] : 10fthf6glu + atp + glu-L --> 10fthf7glu + adp + h + pi	Folate Metabolism	Cytosol	6.3.2.17	Irreversible
FPGS7m	folylpolyglutamate synthetase (10fthf), mitochondrial	[m] : 10fthf + (4) atp + (4) glu-L --> 10fthf5glu + (4) adp + (4) h + (4) pi	Folate Metabolism	Mitochondria	6.3.2.17	Irreversible
FPGS8m	folylpolyglutamate synthetase (10fthf), mitochondrial	[m] : 10fthf5glu + atp + glu-L --> 10fthf6glu + adp + h + pi	Folate Metabolism	Mitochondria	6.3.2.17	Irreversible
FPGS9m	folylpolyglutamate synthetase (10fthf), mitochondrial	[m] : 10fthf6glu + atp + glu-L --> 10fthf7glu + adp + h + pi	Folate Metabolism	Mitochondria	6.3.2.17	Irreversible
FPGS4m	folylpolyglutamate synthetase (DHF), mitochondrial	[m] : (4) atp + dhf + (4) glu-L --> 5dhf + (4) adp + (4) h + (4) pi	Folate Metabolism	Mitochondria	6.3.2.17	Irreversible
FPGS5m	folylpolyglutamate synthetase (DHF), mitochondrial	[m] : 5dhf + atp + glu-L --> 6dhf + adp + h + pi	Folate Metabolism	Mitochondria	6.3.2.17	Irreversible
FPGS6m	folylpolyglutamate synthetase (DHF), mitochondrial	[m] : 6dhf + atp + glu-L --> 7dhf + adp + h + pi	Folate Metabolism	Mitochondria	6.3.2.17	Irreversible
FTHFDH	formyltetrahydrofolate dehydrogenase	[c] : 10fthf + h2o + nadp --> co2 + h + nadph + thf	Folate Metabolism	Cytosol	1.5.1.6	Irreversible
FTCD	formimidoyltransferase cyclodeaminase	[c] : 5forthf + (2) h --> methf + nh4	Folate Metabolism	Cytosol	4.3.1.4	Irreversible
GLCNACASE5ly	alpha-N-acetylglucosaminidase, lysosomal	[l] : h2o + hs_deg24 --> acgam + hs_deg25	Heparan sulfate degradation	Lysosome	3.2.1.50	Irreversible
S3TASE3ly	N-acetylglucosamine-3-sulfatase, lysosomal	[l] : h2o + hs_deg23 <==> h + hs_deg24 + so4	Heparan sulfate degradation	Lysosome	3.1.6.15	Reversible
HSPASEly	heparan sulfate proteoglycan protease, lysosome (endosome)	[l] : h2o + hspg --> Ser-Gly/Ala-X-Gly + hs	Heparan sulfate degradation	Lysosome		Irreversible
FAH1	Fatty acid omega-hydroxylase	[c] : ddca + h + nadph + o2 --> h2o + nadp + whddca	CYP Metabolism	Cytosol		Irreversible
FAH2	Fatty acid omega-hydroxylase	[c] : h + nadph + o2 + ttdca --> h2o + nadp + whttdca	CYP Metabolism	Cytosol		Irreversible
FAH3	Fatty acid omega-hydroxylase	[c] : h + hdca + nadph + o2 --> h2o + nadp + whhdca	CYP Metabolism	Cytosol		Irreversible
UGT1A1r	UDP-glucuronosyltransferase 1-10 precursor, microsomal	[r] : estrone + udpglcur --> estroneglc + udp	Steroid Metabolism	Endoplasmic Reticulum	2.4.1.17	Irreversible
UGT1A3r	UDP-glucuronosyltransferase 1-10 precursor, microsomal	[r] : andrstrn + udpglcur --> andrstrnglc + udp	Steroid Metabolism	Endoplasmic Reticulum	2.4.1.17	Irreversible
UGT1A2r	UDP-glucuronosyltransferase 1-10 precursor, microsomal	[r] : bilirub + (2) udpglcur --> bildglcur + (2) udp	Steroid Metabolism	Endoplasmic Reticulum	2.4.1.17	Irreversible
UGT1A4r	UDP-glucuronosyltransferase 1-10 precursor, microsomal	[r] : tststerone + udpglcur --> tststeroneglc + udp	Steroid Metabolism	Endoplasmic Reticulum	2.4.1.17	Irreversible
UGT1A5r	UDP-glucuronosyltransferase 1-10 precursor, microsomal	[r] : retn + udpglcur --> retnglc + udp	Vitamin A Metabolism	Endoplasmic Reticulum	2.4.1.17	Irreversible
UGT1A6r	UDP-glucuronosyltransferase 1-10 precursor, microsomal	[r] : estradiol + udpglcur --> estradiolglc + udp	Steroid Metabolism	Endoplasmic Reticulum	2.4.1.17	Irreversible
UGT1A7r	UDP-glucuronosyltransferase 1-10 precursor, microsomal	[r] : ahandrostan + udpglcur --> ahandrostanglc + udp	Steroid Metabolism	Endoplasmic Reticulum	2.4.1.17	Irreversible
UGT1A8r	UDP-glucuronosyltransferase 1-10 precursor, microsomal	[r] : estriol + udpglcur --> estriolglc + udp	Steroid Metabolism	Endoplasmic Reticulum	2.4.1.17	Irreversible
CYSGLTH	Glutathione:cystine oxidoreductase	[c] : Lcystin + (2) gthrd <==> (2) cys-L + gthox	Cysteine Metabolism	Cytosol	1.8.4.4	Reversible
CYSLYSL	L-Cystine Lysteine-lyase (deaminating)	[c] : Lcystin + h2o --> nh4 + pyr + thcys	Cysteine Metabolism	Cytosol	4.4.1.1	Irreversible
CYSTA	cysteine transaminase	[c] : akg + cys-L <==> glu-L + mercppyr	Cysteine Metabolism	Cytosol	2.6.1.3	Reversible
CYSTAm	cysteine transaminase (mitochondrial)	[m] : akg + cys-L <==> glu-L + mercppyr	Cysteine Metabolism	Mitochondria	2.6.1.3	Reversible
CYANSTm	Cyanide sulfurtransferase, mitochondrial	[m] : cyan + tsul --> h + so3 + tcynt	Cysteine Metabolism	Mitochondria	2.8.1.1	Irreversible
PSDm_hs	Phosphatidylserine decarboxylase	[m] : h + ps_hs --> co2 + pe_hs	Glycerophospholipid Metabolism	Mitochondria	4.1.1.65	Irreversible
TRIOK	triokinase	[c] : atp + glyald --> adp + g3p + h	Fructose and Mannose Metabolism	Cytosol	2.7.1.28	Irreversible
CBR1	Carbonyl reductase [NADPH] 1	[c] : h + nadph + prostg1 --> nadp + prostge1	Eicosanoid Metabolism	Cytosol		Irreversible
CBR2	Carbonyl reductase [NADPH] 1	[c] : h + nadph + prostge2 --> nadp + prostgf2	Eicosanoid Metabolism	Cytosol		Irreversible
PCHOLPm_hs	choline phosphatase	[m] : h2o + pchol_hs --> chol + h + pa_hs	Glycerophospholipid Metabolism	Mitochondria	3.1.4.4	Irreversible
PCHOLPr_hs	choline phosphatase	[r] : h2o + pchol_hs --> chol + h + pa_hs	Glycerophospholipid Metabolism	Endoplasmic Reticulum	3.1.4.4	Irreversible
PCHOLPg_hs	choline phosphatase	[g] : h2o + pchol_hs --> chol + h + pa_hs	Glycerophospholipid Metabolism	Golgi Apparatus	3.1.4.4	Irreversible
PCHOLP_hs	choline phosphatase	[c] : h2o + pchol_hs --> chol + h + pa_hs	Glycerophospholipid Metabolism	Cytosol	3.1.4.4	Irreversible
CHAT	Choline O-acetyltransferase	[c] : accoa + chol <==> ach + coa	Glycerophospholipid Metabolism	Cytosol		Reversible
CHATn	Choline O-acetyltransferase	[n] : accoa + chol <==> ach + coa	Glycerophospholipid Metabolism	Nucleus		Reversible
CHLP	choline phosphate phosphatase	[c] : cholp + h2o --> chol + pi	Glycerophospholipid Metabolism	Cytosol	2.7.7.15	Irreversible
ETHP	ethanolamine phosphate phosphatase	[c] : ethamp + h2o --> etha + pi	Glycerophospholipid Metabolism	Cytosol		Irreversible
P4502C92	cytochrome P450 2C9	[c] : h + limnen + nadph + o2 --> carveol + h2o + nadp	Limonene and pinene degradation	Cytosol		Irreversible
P4502C93	cytochrome P450 2C9	[c] : h + limnen + nadph + o2 --> h2o + nadp + perillyl	Limonene and pinene degradation	Cytosol		Irreversible
P4502C94	cytochrome P450 2C9	[c] : appnn + h + nadph + o2 --> apnnox + h2o + nadp	Limonene and pinene degradation	Cytosol		Irreversible
HOXG	Heme oxygenase 1	[c] : (5) h + (3) nadph + (3) o2 + pheme --> biliverd + co + fe2 + (3) h2o + (3) nadp	Heme Degradation	Cytosol	1.14.99.3	Irreversible
SALMCOM2	S-Adenosyl-L-methionine:catechol O-methyltransferase	[c] : adrnl + amet --> ahcys + h + mepi	Tyrosine metabolism	Cytosol	2.1.1.6	Irreversible
DASPO1p	D-aspartate oxidase, peroxisomal	[x] : asp-D + h2o + o2 --> h2o2 + nh4 + oaa	Alanine and Aspartate Metabolism	Peroxisome	1.4.3.1	Irreversible
ASPDxt	D-aspartate transport, peroxisomal	asp-D[x] <==> asp-D[c]	Transport, Peroxisomal	Cytosol, Peroxisome		Reversible
PRDX	Peroxidase (multiple substrates)	[c] : h2o2 + meoh --> fald + (2) h2o	Miscellaneous	Cytosol	1.11.1.7	Irreversible
PRDXl	Peroxidase (multiple substrates)	[l] : h2o2 + meoh --> fald + (2) h2o	Miscellaneous	Lysosome	1.11.1.7	Irreversible
GLNtm	L-glutamine transport via electroneutral transporter	gln-L[c] --> gln-L[m]	Transport, Mitochondrial	Cytosol, Mitochondria		Irreversible
ASNtm	L-asparagine transport, mitochondrial	asn-L[c] --> asn-L[m]	Transport, Mitochondrial	Cytosol, Mitochondria		Irreversible
DHEASULT	Dehydroepiandrosterone sulfotransferase	[c] : dhea + paps --> dheas + h + pap	Steroid Metabolism	Cytosol	2.8.2.2	Irreversible
ESTSULT	Estrogen sulfotransferase	[c] : estrone + paps --> estrones + h + pap	Steroid Metabolism	Cytosol	2.8.2.4	Irreversible
STS1r	Steryl-sulfatase	[r] : dheas + h2o --> dhea + h + so4	Steroid Metabolism	Endoplasmic Reticulum	3.1.6.2	Irreversible
STS2r	Steryl-sulfatase	[r] : estrones + h2o --> estrone + h + so4	Steroid Metabolism	Endoplasmic Reticulum	3.1.6.2	Irreversible
PAFH	Platelet-activating factor acetylhydrolase	[c] : h2o + paf_hs --> ac + ak2lgchol_hs + h	Glycerophospholipid Metabolism	Cytosol	3.1.1.47	Irreversible
XAO2x	xanthine oxidase	[x] : h2o + hxan + o2 --> h2o2 + xan	Purine Catabolism	Peroxisome		Irreversible
XAOx	xanthine oxidase,peroxisomal	[x] : h2o + o2 + xan --> h2o2 + urate	Purine Catabolism	Peroxisome		Irreversible
DHORD9	dihydoorotic acid dehydrogenase (quinone10)	dhor-S[c] + q10[m] --> orot[c] + q10h2[m]	Pyrimidine Biosynthesis	Cytosol, Mitochondria		Irreversible
NORANMT	noradrenaline N-methyltransferase	[c] : amet + nrpphr --> adrnl + ahcys + h	Tyrosine metabolism	Cytosol	2.1.1.28	Irreversible
41R2A1H12BOOX	4-[(1R)-2-Amino-1-hydroxyethyl]-1,2-benzenediol:oxygen oxidoreductase(deaminating)(flavin-containing)	[c] : h2o + nrpphr + o2 --> 34dhmald + h2o2 + nh4	Tyrosine metabolism	Cytosol	1.4.3.4	Irreversible
DOPABMO	dopamine beta-monooxygenase	[c] : ascb-L + dopa + o2 --> dhdascb + h2o + nrpphr	Tyrosine metabolism	Cytosol	1.14.17.1	Irreversible
SALMCOM	S-Adenosyl-L-methionine:catechol O-methyltransferase	[c] : amet + nrpphr --> ahcys + h + normete-L	Tyrosine metabolism	Cytosol	2.1.1.6	Irreversible
DOPASULT	Dopamine Sulfotransferase	[c] : dopa + paps --> dopasf + h + pap	Tyrosine metabolism	Cytosol	2.8.2.1	Irreversible
TYMSULT	Tyramine Sulfotransferase	[c] : paps + tym --> h + pap + tymsf	Tyrosine metabolism	Cytosol	2.8.2.1	Irreversible
4NPHSULT	4-Nitrophenol Sulfotransferase	[c] : 4nph + paps --> 4nphsf + h + pap	CYP Metabolism	Cytosol	2.8.2.1	Irreversible
NRPPHRSULT	Norepinephrine Sulfotransferase	[c] : nrpphr + paps --> h + nrpphrsf + pap	Tyrosine metabolism	Cytosol	2.8.2.1	Irreversible
TRIODTHYSULT	Triiodothyronine Sulfotransferase	[c] : paps + triodthy --> h + pap + triodthysuf	Tyrosine metabolism	Cytosol	2.8.2.1	Irreversible
AMETt2m	S-Adenosyl-L-methionine reversible transport, mitochondrial	ahcys[m] + amet[c] <==> ahcys[c] + amet[m]	Transport, Mitochondrial	Cytosol, Mitochondria		Reversible
THYPX	thyroid peroxidase	[c] : (2) h + h2o2 + (2) i --> (2) h2o + iodine	Tyrosine metabolism	Cytosol		Irreversible
BTNDm	biotinidase (biotin), mitochondrial	[m] : biocyt + h2o --> btn + lys-L	Biotin Metabolism	Mitochondria	3.5.1.12	Irreversible
CMPACNAtg	CMP-Sia Golgi transport via CMP antiport	cmp[g] + cmpacna[c] <==> cmp[c] + cmpacna[g]	Transport, Golgi Apparatus	Cytosol, Golgi Apparatus		Reversible
UDPGALtg	UDP-Gal Golgi transport via CMP antiport	udpgal[c] + ump[g] <==> udpgal[g] + ump[c]	Transport, Golgi Apparatus	Cytosol, Golgi Apparatus		Reversible
UDPGLCtg	UDP-Glc Golgi transport via CMP antiport	udpg[c] + ump[g] <==> udpg[g] + ump[c]	Transport, Golgi Apparatus	Cytosol, Golgi Apparatus		Reversible
ADNtm	adenosine facilated transport in mitochondria	adn[c] <==> adn[m]	Transport, Mitochondrial	Cytosol, Mitochondria		Reversible
GSNtm	guanosine facilated transport in mitochondria	gsn[c] <==> gsn[m]	Transport, Mitochondrial	Cytosol, Mitochondria		Reversible
Uritm	uridine facilated transport in mitochondria	uri[c] <==> uri[m]	Transport, Mitochondrial	Cytosol, Mitochondria		Reversible
CYTDtm	cytidine facilated transport in mitochondria	cytd[c] <==> cytd[m]	Transport, Mitochondrial	Cytosol, Mitochondria		Reversible
UGALNACtg	UDP-GalNAc Golgi transport via CMP antiport	udpacgal[c] + ump[g] <==> udpacgal[g] + ump[c]	Transport, Golgi Apparatus	Cytosol, Golgi Apparatus		Reversible
PAPStg	3'-Phosphoadenylyl sufate Golgi transport	paps[c] <==> paps[g]	Transport, Golgi Apparatus	Cytosol, Golgi Apparatus		Reversible
GDPFUCtg	GDPFuc Golgi transport via CMP antiport	gdpfuc[c] + gmp[g] <==> gdpfuc[g] + gmp[c]	Transport, Golgi Apparatus	Cytosol, Golgi Apparatus		Reversible
UGLCNACtg	UDP-GlcNAc Golgi transport via CMP antiport	uacgam[c] + ump[g] <==> uacgam[g] + ump[c]	Transport, Golgi Apparatus	Cytosol, Golgi Apparatus		Reversible
UDPGLCAter	UDPGlcA endoplasmic reticulum transport via UMP antiport	udpglcur[r] + ump[c] <==> udpglcur[c] + ump[r]	Transport, Endoplasmic Reticular	Cytosol, Endoplasmic Reticulum		Reversible
UGALNACter	UDP-GalNAc endoplasmic reticulum transport via CMP antiport	udpacgal[c] + ump[r] <==> udpacgal[r] + ump[c]	Transport, Endoplasmic Reticular	Cytosol, Endoplasmic Reticulum		Reversible
PPA2	inorganic triphosphatase	[c] : h2o + pppi --> h + pi + ppi	Others	Cytosol	3.6.1.1	Irreversible
ACCOAgt	acetyl-coa transport	accoa[c] <==> accoa[g]	Transport, Extracellular	Cytosol, Golgi Apparatus		Reversible
INStm	inosine facilated transport in mitochondria	ins[c] <==> ins[m]	Transport, Mitochondrial	Cytosol, Mitochondria		Reversible
ACCOAtr	acetyl-coa transport	accoa[c] <==> accoa[r]	Transport, Endoplasmic Reticular	Cytosol, Endoplasmic Reticulum		Reversible
GAO1g	Ganglioside O-acetylation	[g] : accoa + gd3_hs --> coa + oagd3_hs	Sphingolipid Metabolism	Golgi Apparatus		Irreversible
GAO2g	Ganglioside O-acetylation	[g] : accoa + gt3_hs --> coa + oagt3_hs	Sphingolipid Metabolism	Golgi Apparatus		Irreversible
Uritl	uridine facilated transport from lysosome	uri[l] <==> uri[c]	Transport, Lysosomal	Cytosol, Lysosome		Reversible
INStl	inosine facilated transport from lysosome	ins[l] <==> ins[c]	Transport, Lysosomal	Cytosol, Lysosome		Reversible
CYTDtl	Cytidine facilated transport from lysosome	cytd[l] <==> cytd[c]	Transport, Lysosomal	Cytosol, Lysosome		Reversible
ADEtl	adenine facilated transport from lysosome	ade[l] <==> ade[c]	Transport, Lysosomal	Cytosol, Lysosome		Reversible
HXANtl	hypoxanthine facilated transport from lysosome	hxan[l] <==> hxan[c]	Transport, Lysosomal	Cytosol, Lysosome		Reversible
THYMDtl	thymidine facilated transport from lysosome	thymd[l] <==> thymd[c]	Transport, Lysosomal	Cytosol, Lysosome		Reversible
GSNtl	guanosine facilated transport from lysosome	gsn[l] <==> gsn[c]	Transport, Lysosomal	Cytosol, Lysosome		Reversible
ADNtl	adenosine facilated transport from lysosome	adn[l] <==> adn[c]	Transport, Lysosomal	Cytosol, Lysosome		Reversible
VALt5m	Valine reversible mitochondrial transport	val-L[c] <==> val-L[m]	Transport, Mitochondrial	Cytosol, Mitochondria		Reversible
LEUt5m	leucine mitochondrial transport	leu-L[c] <==> leu-L[m]	Transport, Mitochondrial	Cytosol, Mitochondria		Reversible
ILEt5m	Isoleucine mitochondrial transport	ile-L[c] <==> ile-L[m]	Transport, Mitochondrial	Cytosol, Mitochondria		Reversible
CHSTEROLtg	cholesterol efflux (ATP depedent), golgi	atp[c] + chsterol[g] + h2o[c] --> adp[c] + chsterol[c] + h[c] + pi[c]	Transport, Golgi Apparatus	Cytosol, Golgi Apparatus		Irreversible
3NTD7l	3'-nucleotidase (AMP), lysosome	[l] : 3amp + h2o --> adn + pi	Nucleic acid degradation	Lysosome		Irreversible
NTD7l	5'-nucleotidase (AMP), lysosome	[l] : amp + h2o --> adn + pi	Nucleic acid degradation	Lysosome	3.1.3.5	Irreversible
NTD9l	5'-nucleotidase (GMP), lysosome	[l] : gmp + h2o --> gsn + pi	Nucleic acid degradation	Lysosome	3.1.3.5	Irreversible
NTD4l	5'-nucleotidase (CMP), lysosome	[l] : cmp + h2o --> cytd + pi	Nucleic acid degradation	Lysosome	3.1.3.5	Irreversible
NTD2l	5'-nucleotidase (UMP), lysosome	[l] : h2o + ump --> pi + uri	Nucleic acid degradation	Lysosome	3.1.3.5	Irreversible
NTD6l	5'-nucleotidase (dAMP), lysosome	[l] : damp + h2o --> dad-2 + pi	Nucleic acid degradation	Lysosome	3.1.3.5	Irreversible
NTD8l	5'-nucleotidase (dGMP), lysosomal	[l] : dgmp + h2o --> dgsn + pi	Nucleic acid degradation	Lysosome	3.1.3.5	Irreversible
NTD5l	5'-nucleotidase (dTMP), lysosomal	[l] : dtmp + h2o --> pi + thymd	Nucleic acid degradation	Lysosome	3.1.3.5	Irreversible
NTD3l	5'-nucleotidase (dCMP), lysosomal	[l] : dcmp + h2o --> dcyt + pi	Nucleic acid degradation	Lysosome	3.1.3.5	Irreversible
LYSOXp	L-lysine oxidase, peroxisomal	[x] : h2o + lys-L + o2 --> 6a2ohxnt + h2o2 + nh4	Lysine Metabolism	Peroxisome	1.4.3.14	Irreversible
PPD2CSPp	PPD2CSPp	[x] : 6a2ohxnt --> 1pipdn2c + h2o	Lysine Metabolism	Peroxisome		Irreversible
1PPDCRp	delta1-piperideine-2-carboxylate reductase, perixosomal	[x] : 1pipdn2c + h + nadh --> Lpipecol + nad	Lysine Metabolism	Peroxisome		Irreversible
NAt3_1g	sodium proton antiporter (H:NA is 1:1)	h[g] + na1[c] <==> h[c] + na1[g]	Transport, Golgi Apparatus	Cytosol, Golgi Apparatus		Reversible
Kt3g	potassium transport via proton antiport	h[g] + k[c] <==> h[c] + k[g]	Transport, Golgi Apparatus	Cytosol, Golgi Apparatus		Reversible
FRDPtr	lipid, flip-flop intracellular transport	frdp[x] <==> frdp[r]	Transport, Peroxisomal	Endoplasmic Reticulum, Peroxisome		Reversible
XOLDIOLONEt	lipid, flip-flop intracellular transport	xoldiolone[c] <==> xoldiolone[r]	Transport, Endoplasmic Reticular	Cytosol, Endoplasmic Reticulum		Reversible
MMMm	methylmalonyl-CoA mutase	[m] : mmcoa-R <==> succoa	Valine, Leucine, and Isoleucine Metabolism	Mitochondria	5.4.99.2	Reversible
THP2Ctp	2,3,4,5-Tetrahydropyridine-2-carboxylate transport, peroxisomal	thp2c[c] <==> thp2c[x]	Transport, Peroxisomal	Cytosol, Peroxisome		Reversible
LYStip	L-lysine transport, peroxisomal (irreversible)	lys-L[c] --> lys-L[x]	Transport, Peroxisomal	Cytosol, Peroxisome		Irreversible
C161CPT1	carnitine O-palmitoyltransferase	[c] : crn + hdcoa --> coa + hdcecrn	Carnitine shuttle	Cytosol	2.3.1.21	Irreversible
C161CPT2	C161 transport into the mitochondria	[m] : coa + hdcecrn --> crn + hdcoa	Carnitine shuttle	Mitochondria		Irreversible
C161CRNt	C161 transport into the mitochondria	hdcecrn[c] --> hdcecrn[m]	Carnitine shuttle	Cytosol, Mitochondria		Irreversible
SCP21x	Sterol carrier protein 2	phytcoa[c] <==> phytcoa[x]	Transport, Peroxisomal	Cytosol, Peroxisome		Reversible
SCP22x	Sterol carrier protein 2	dmnoncoa[c] <==> dmnoncoa[x]	Transport, Peroxisomal	Cytosol, Peroxisome		Reversible
FACOAL206	fatty-acid--CoA ligase	[c] : atp + coa + phyt <==> amp + phytcoa + ppi	Fatty acid activation	Cytosol	6.2.1.3	Reversible
C110CPT2m	C110 transport into the mitochondria	[m] : coa + dmnoncrn --> crn + dmnoncoa	Fatty Acid Metabolism	Mitochondria		Irreversible
CSNAT2x	carnitine dimethyl nonanoyl transferase, revsible, peroxisomal	[x] : crn + dmnoncoa <==> coa + dmnoncrn	Fatty Acid Metabolism	Peroxisome	2.3.1.7	Reversible
CRNtx	carnitine transport peroxisome to mitochondria	dmnoncrn[x] <==> dmnoncrn[m]	Transport, Peroxisomal	Mitochondria, Peroxisome		Reversible
FAOXC11	Beta oxidation of long chain fatty acid	[m] : coa + dmnoncoa + h2o + nad --> accoa + dmhptcoa + h + nadh	Fatty acid oxidation	Mitochondria	1.3.99.3	Irreversible
NICRNS	NICRNS	[c] : atp + nicrns --> adp + h + nicrnt	NAD Metabolism	Cytosol		Irreversible
NT5C	5'-nucleotidase	[c] : h2o + nicrnt --> nicrns + pi	NAD Metabolism	Cytosol	3.1.3.5	Irreversible
NP1	nucleotide phosphatase	[c] : h + nac + r1p --> nicrns + pi	NAD Metabolism	Cytosol	2.4.2.1	Irreversible
DCIm	dodecenoyl-Coenzyme A delta isomerase	[m] : dd2coa <==> dd3coa	Fatty Acid Metabolism	Mitochondria	5.3.3.8	Reversible
BETALDHxm	betaine-aldehyde dehydrogenase, mitochondrial	[m] : betald + h2o + nad --> glyb + (2) h + nadh	Glycine, Serine, and Threonine Metabolism	Mitochondria	1.2.1.8	Irreversible
3MOPt2im	3-Methyl-2-oxopentanoate mitochondrial transport via proton symport	3mop[c] + h[c] --> 3mop[m] + h[m]	Transport, Mitochondrial	Cytosol, Mitochondria		Irreversible
4MOPt2im	4-methyl-2-oxopentanoate mitochondrial transport via proton symport	4mop[c] + h[c] --> 4mop[m] + h[m]	Transport, Mitochondrial	Cytosol, Mitochondria		Irreversible
3MOBt2im	3-methyl-2-oxobutanoate mitochondrial transport via proton symport	3mob[c] + h[c] --> 3mob[m] + h[m]	Transport, Mitochondrial	Cytosol, Mitochondria		Irreversible
UDPXYLtg	UDP-Xyl Golgi transport via CMP antiport	udpxyl[c] + ump[g] <==> udpxyl[g] + ump[c]	Transport, Golgi Apparatus	Cytosol, Golgi Apparatus		Reversible
CHLtm	choline transport via diffusion (cytosol to mitochondria)	chol[c] <==> chol[m]	Transport, Mitochondrial	Cytosol, Mitochondria		Reversible
GLYBtm	Glycine betaine transport via diffusion (mitochondria to cytosol)	glyb[m] <==> glyb[c]	Transport, Mitochondrial	Cytosol, Mitochondria		Reversible
DMGtm	dimethylglycine transport via diffusion (cytosol to mitochondria)	dmgly[c] <==> dmgly[m]	Transport, Mitochondrial	Cytosol, Mitochondria		Reversible
CERT1gt	ceramide transport protein	crm_hs[c] <==> crm_hs[g]	Transport, Golgi Apparatus	Cytosol, Golgi Apparatus		Reversible
CERT1rt	ceramide transport protein	crm_hs[c] <==> crm_hs[r]	Transport, Endoplasmic Reticular	Cytosol, Endoplasmic Reticulum		Reversible
CERT2gt	ceramide transport protein	gluside_hs[c] <==> gluside_hs[g]	Transport, Golgi Apparatus	Cytosol, Golgi Apparatus		Reversible
CERT2rt	ceramide transport protein	gluside_hs[c] <==> gluside_hs[r]	Transport, Endoplasmic Reticular	Cytosol, Endoplasmic Reticulum		Reversible
G3PD2m	glycerol-3-phosphate dehydrogenase (FAD), mitochondrial	fad[m] + glyc3p[c] --> dhap[c] + fadh2[m]	Glycolysis/Gluconeogenesis	Cytosol, Mitochondria	1.1.99.5	Irreversible
UDPG1P	UDPglucuronate uridine-monophosphohydrolase	[c] : h2o + udpglcur --> glcur1p + (2) h + ump	Pentose and Glucuronate Interconversions	Cytosol		Irreversible
GUR1PP	Glucuronate 1-phosphate phosphatase	[c] : glcur1p + h2o --> glcur + pi	Pentose and Glucuronate Interconversions	Cytosol		Irreversible
GULLACter	gulonolactone endoplasmic reticular transport	gullac[c] --> gullac[r]	Transport, Endoplasmic Reticular	Cytosol, Endoplasmic Reticulum		Irreversible
GLCURter	glucuronate endoplasmic reticular transport	glcur[c] --> glcur[r]	Transport, Endoplasmic Reticular	Cytosol, Endoplasmic Reticulum		Irreversible
GULNter	L-gulonate endoplasmic reticular export	guln[r] --> guln[c]	Transport, Endoplasmic Reticular	Cytosol, Endoplasmic Reticulum		Irreversible
MAOX	Methylamine oxidase	[c] : h2o + mma + o2 --> fald + h2o2 + nh4	Tyrosine metabolism	Cytosol	1.4.3.6	Irreversible
SERHL	L-Serine hydro-lyase	[c] : ser-L --> 2amac + h2o	Glycine, Serine, and Threonine Metabolism	Cytosol		Irreversible
H2Otg	H2O transport, Golgi apparatus	h2o[c] <==> h2o[g]	Transport, Golgi Apparatus	Cytosol, Golgi Apparatus		Reversible
H2Otly	H2O transport, lysosomal	h2o[c] <==> h2o[l]	Transport, Lysosomal	Cytosol, Lysosome		Reversible
H2O2tly	hydrogen peroxide lysosomal transport via diffusion	h2o2[c] <==> h2o2[l]	Transport, Lysosomal	Cytosol, Lysosome		Reversible
O2tp	O2 transport, peroxisomal	o2[c] <==> o2[x]	Transport, Peroxisomal	Cytosol, Peroxisome		Reversible
GLCtg	glucose transport, Golgi apparatus	glc-D[c] <==> glc-D[g]	Transport, Golgi Apparatus	Cytosol, Golgi Apparatus		Reversible
NDP7g	nucleoside-diphosphatase (UDP), Golgi apparatus	[g] : h2o + udp --> h + pi + ump	Nucleotides	Golgi Apparatus	3.6.1.6	Irreversible
CHSTEROLt1	cholesterol intracellular transport	chsterol[l] <==> chsterol[m]	Transport, Mitochondrial	Lysosome, Mitochondria		Reversible
CHSTEROLt2	cholesterol intracellular transport	chsterol[r] <==> chsterol[m]	Transport, Mitochondrial	Endoplasmic Reticulum, Mitochondria		Reversible
CHSTEROLt3	cholesterol intracellular transport	chsterol[c] <==> chsterol[m]	Transport, Mitochondrial	Cytosol, Mitochondria		Reversible
ATPtx	ATP transporter, peroxisomal	atp[c] <==> atp[x]	Transport, Peroxisomal	Cytosol, Peroxisome		Reversible
ADPtx	ADP transporter, peroxisomal	adp[c] <==> adp[x]	Transport, Peroxisomal	Cytosol, Peroxisome		Reversible
FADtx	FAD transporter, peroxisomal	fad[c] <==> fad[x]	Transport, Peroxisomal	Cytosol, Peroxisome		Reversible
FADH2tx	FADH2 transporter, peroxisomal	fadh2[c] <==> fadh2[x]	Transport, Peroxisomal	Cytosol, Peroxisome		Reversible
2AMACHYD	2-Aminoacrylate hydrolysis	[c] : 2amac + h2o --> nh4 + pyr	Glycine, Serine, and Threonine Metabolism	Cytosol		Irreversible
FACOAL1821	fatty-acid--CoA ligase	[c] : atp + coa + lnlc <==> amp + lnlccoa + ppi	Fatty acid activation	Cytosol	6.2.1.3	Reversible
FA1821ACPH	fatty-acyl-ACP hydrolase	[c] : h2o + lnlcACP <==> ACP + h + lnlc	Fatty Acid Metabolism	Cytosol	3.1.2.14	Reversible
FA1822ACPH	fatty-acyl-ACP hydrolase	[c] : h2o + lneldcACP <==> ACP + h + lneldc	Fatty Acid Metabolism	Cytosol	3.1.2.14	Reversible
ARTCOAL1	R group coenzyme a ligase	[c] : Rtotal + coa <==> Rtotalcoa	R Group Synthesis	Cytosol		Reversible
ARTCOAL2	R group coenzyme a ligase	[c] : Rtotal2 + coa <==> Rtotal2coa	R Group Synthesis	Cytosol		Reversible
ARTCOAL3	R group coenzyme a ligase	[c] : Rtotal3 + coa <==> Rtotal3coa	R Group Synthesis	Cytosol		Reversible
ARTPLM1	R group to palmitate conversion	[c] : Rtotalcoa <==> pmtcoa	R Group Synthesis	Cytosol		Reversible
ARTPLM2	R group to palmitate conversion	[c] : Rtotal2coa <==> pmtcoa	R Group Synthesis	Cytosol		Reversible
ARTPLM3	R group to palmitate conversion	[c] : Rtotal3coa <==> pmtcoa	R Group Synthesis	Cytosol		Reversible
IDHPOXOXb	Iodide:hydrogen-peroxide oxidoreductase	[c] : iodine + tyr-L --> 3ityr-L + h + i	Tyrosine metabolism	Cytosol	1.11.1.8	Irreversible
IDHPOXOX2b	Iodide:hydrogen-peroxide oxidoreductase 2	[c] : 3ityr-L + iodine --> 35diotyr + h + i	Tyrosine metabolism	Cytosol	1.11.1.8	Irreversible
SPODMx	superoxide dismutase, peroxisome	[x] : (2) h + (2) o2s --> h2o2 + o2	ROS Detoxification	Peroxisome	1.15.1.1	Irreversible
SPODMn	superoxide dismutase, nuclear	[n] : (2) h + (2) o2s --> h2o2 + o2	ROS Detoxification	Nucleus	1.15.1.1	Irreversible
H2O2syn	Hydrogen peroxide synthesis (NADPH dependent)	[c] : h + nadph + o2 --> h2o2 + nadp	Tyrosine metabolism	Cytosol		Irreversible
CHTNASE	chitinase	[c] : chtn + (2) h2o --> (3) acgam	Aminosugar Metabolism	Cytosol	3.2.1.14	Irreversible
MCPST	3-mercaptopyruvate sulfurtransferase	[c] : cyan + mercppyr --> h + pyr + tcynt	Cysteine Metabolism	Cytosol	2.8.1.2	Irreversible
UDPGLDCg	UDP-D-glucuronate decarboxylase, Golgi apparatus	[g] : h + udpglcur --> co2 + udpxyl	Nucleotide Sugar Metabolism	Golgi Apparatus	4.1.1.35	Irreversible
GLACter	D-glucurono-6,3-lactone transport, endoplasmic reticulum	glac[c] <==> glac[r]	Transport, Endoplasmic Reticular	Cytosol, Endoplasmic Reticulum		Reversible
GLCURtly	glucuronate transport into lysososme	glcur[c] + h[c] <==> glcur[l] + h[l]	Transport, Lysosomal	Cytosol, Lysosome		Reversible
ACNAMlt	N-acetylneuraminate transport into lysososme	acnam[c] + h[c] <==> acnam[l] + h[l]	Transport, Lysosomal	Cytosol, Lysosome		Reversible
PTE2x	peroxisomal acyl-CoA thioesterase	[x] : h2o + pmtcoa --> coa + h + hdca	Fatty Acid Metabolism	Peroxisome		Irreversible
AKR1C1	aldo-keto reductase family 1, member C1 (chlordecone reductase; 3-alpha hydroxysteroid dehydrogenase, type I; dihydrodiol dehydrogenase 4)	[c] : h + nadph + prgstrn --> aprgstrn + nadp	Steroid Metabolism	Cytosol		Irreversible
DDPGAm	2-dehydro-3-deoxy-phosphogluconate aldolase, mitochondrial	[m] : 4h2oglt <==> glx + pyr	Arginine and Proline Metabolism	Mitochondria	4.1.2.14	Reversible
GLXtm	glyoxylate transport, mitochondrial	glx[c] <==> glx[m]	Transport, Mitochondrial	Cytosol, Mitochondria		Reversible
GLXO2p	glyoxylate oxidase, peroxisomal	[x] : glx + h2o + o2 --> h + h2o2 + oxa	Glyoxylate and Dicarboxylate Metabolism	Peroxisome		Irreversible
GLYCLTDym	Glycolate dehydrogenase (NADP), mitochondrial	[m] : glx + h + nadph --> glyclt + nadp	Glyoxylate and Dicarboxylate Metabolism	Mitochondria		Irreversible
HPYRDCm	hydroxypyruvate decarboxylase, mitochondria	[m] : h + hpyr --> co2 + gcald	Glyoxylate and Dicarboxylate Metabolism	Mitochondria	4.1.1.40	Irreversible
KHK2	ketohexokinase (D-xylulose)	[c] : atp + xylu-D --> adp + h + xu1p-D	Glyoxylate and Dicarboxylate Metabolism	Cytosol	2.7.1.3	Irreversible
FBA4	D-Fructose 1-phosphate D-glyceraldehyde-3-phosphate-lyase	[c] : xu1p-D <==> dhap + gcald	Glyoxylate and Dicarboxylate Metabolism	Cytosol	4.1.2.13	Reversible
EHGLAT2m	L-erythro-4-Hydroxyglutamate:2-oxoglutarate aminotransferase 2, mitochondrial	[m] : e4hglu + oaa --> 4h2oglt + asp-L	Arginine and Proline Metabolism	Mitochondria	2.6.1.21	Irreversible
P45027A14m	5-beta-cytochrome P450, family 27, subfamily A, polypeptide 1	[m] : h + nadph + o2 + xol7ah2 --> h2o + nadp + xol7ah3	Bile Acid Biosynthesis	Mitochondria	1.14.13.15	Irreversible
BAAT1x	bile acid Coenzyme A: amino acid N-acyltransferase	[x] : cholcoa + gly --> coa + gchola	Bile Acid Biosynthesis	Peroxisome	2.3.1.65	Irreversible
BAAT2x	bile acid Coenzyme A: amino acid N-acyltransferase	[x] : cholcoa + taur --> coa + tchola	Bile Acid Biosynthesis	Peroxisome	2.3.1.65	Irreversible
VLCSp	Very-long-chain-fatty-acid-CoA ligase	[x] : atp + coa + thcholstoic --> amp + cholcoar + ppi	Bile Acid Biosynthesis	Peroxisome	6.2.1.7	Irreversible
P45027A13m	5-beta-cholestane-3-alpha,7-alpha,12-alpha-triol 27-hydroxylase	[m] : nadph + o2 + thcholst --> h2o + nadp + thcholstoic	Bile Acid Biosynthesis	Mitochondria	1.14.13.15	Irreversible
VLCSr	Very-long-chain-fatty-acid-CoA ligase	[r] : atp + coa + thcholstoic --> amp + cholcoar + ppi	Bile Acid Biosynthesis	Endoplasmic Reticulum	6.2.1.7	Irreversible
P45027A15m	5-beta-cytochrome P450, family 27, subfamily A, polypeptide 1	[m] : h + nadph + o2 + xol7ah3 --> (2) h2o + nadp + xol7ah2al	Bile Acid Biosynthesis	Mitochondria	1.14.13.15	Irreversible
P45027A16m	Cytochrome P450 27	[m] : nadph + o2 + xol7ah2al --> dhcholestanate + h2o + nadp	Bile Acid Biosynthesis	Mitochondria	1.14.13.15	Irreversible
VLCS2p	Very-long-chain-fatty-acid-CoA ligase	[x] : atp + coa + dhcholestanate --> amp + dhcholestancoa + ppi	Bile Acid Biosynthesis	Peroxisome	6.2.1.7	Irreversible
VLCS2r	Very-long-chain-fatty-acid-CoA ligase	[r] : atp + coa + dhcholestanate --> amp + dhcholestancoa + ppi	Bile Acid Biosynthesis	Endoplasmic Reticulum	6.2.1.7	Irreversible
AMACR2p	alpha-methylacyl-CoA racemase (reductase)	[x] : dhcholestancoa + (0.5) o2 --> dhcholoylcoa + h2o	Bile Acid Biosynthesis	Peroxisome	5.1.99.4	Irreversible
AMACR2r	alpha-methylacyl-CoA racemase (reductase)	[r] : dhcholestancoa + (0.5) o2 --> dhcholoylcoa + h2o	Bile Acid Biosynthesis	Endoplasmic Reticulum	5.1.99.4	Irreversible
ACOX22x	acyl-Coenzyme A oxidase 2, branched chain	[x] : dhcholoylcoa + fadh2 + (0.5) o2 --> fad + thcholoylcoa	Bile Acid Biosynthesis	Peroxisome	1.3.3.6	Irreversible
HSD17B42x	hydroxysteroid (17-beta) dehydrogenase 4	[x] : h + nadph + o2 + thcholoylcoa --> dhocholoylcoa + (2) h2o + nadp	Bile Acid Biosynthesis	Peroxisome		Irreversible
SCP2x	peroxisomal thiolase 2	[x] : coa + dhocholoylcoa --> dgcholcoa + ppcoa	Bile Acid Biosynthesis	Peroxisome		Irreversible
BAAT3x	bile acid Coenzyme A: amino acid N-acyltransferase	[x] : dgcholcoa + gly --> coa + dgchol	Bile Acid Biosynthesis	Peroxisome	2.3.1.65	Irreversible
SCP3x	peroxisomal thiolase 2	[x] : coa + dhcholestancoa + o2 --> dcholcoa + h2o + ppcoa	Bile Acid Biosynthesis	Peroxisome		Irreversible
BAAT4x	bile acid Coenzyme A: amino acid N-acyltransferase	[x] : dcholcoa + gly --> coa + gdchola	Bile Acid Biosynthesis	Peroxisome	2.3.1.65	Irreversible
BAAT5x	bile acid Coenzyme A: amino acid N-acyltransferase	[x] : dcholcoa + taur --> coa + tdchola	Bile Acid Biosynthesis	Peroxisome	2.3.1.65	Irreversible
Htr	H transporter, endoplasmic reticulum	h[c] <==> h[r]	Transport, Endoplasmic Reticular	Cytosol, Endoplasmic Reticulum		Reversible
NADtru	NAD transporter, endoplasmic reticulum	nad[r] --> nad[c]	Transport, Endoplasmic Reticular	Cytosol, Endoplasmic Reticulum		Irreversible
FADtru	FAD transporter, endoplasmic reticulum	fad[r] --> fad[c]	Transport, Endoplasmic Reticular	Cytosol, Endoplasmic Reticulum		Irreversible
NADHtru	NADH transporter, endoplasmic reticulum	nadh[c] --> nadh[r]	Transport, Endoplasmic Reticular	Cytosol, Endoplasmic Reticulum		Irreversible
NADPHtru	NADPH transporter, endoplasmic reticulum	nadph[c] --> nadph[r]	Transport, Endoplasmic Reticular	Cytosol, Endoplasmic Reticulum		Irreversible
NADPtru	NADP transporter, endoplasmic reticulum	nadp[r] --> nadp[c]	Transport, Endoplasmic Reticular	Cytosol, Endoplasmic Reticulum		Irreversible
FADH2tru	FADH2 transporter, endoplasmic reticulum	fadh2[c] --> fadh2[r]	Transport, Endoplasmic Reticular	Cytosol, Endoplasmic Reticulum		Irreversible
BZtr	Benzene transporter, endoplasmic reticulum	bz[c] <==> bz[r]	Transport, Endoplasmic Reticular	Cytosol, Endoplasmic Reticulum		Reversible
PPItr	Diphosphate transporter, endoplasmic reticulum	ppi[c] <==> ppi[r]	Transport, Endoplasmic Reticular	Cytosol, Endoplasmic Reticulum		Reversible
MEOHtr	Methanol transporter, endoplasmic reticulum	meoh[c] <==> meoh[r]	Transport, Endoplasmic Reticular	Cytosol, Endoplasmic Reticulum		Reversible
AMPtr	AMP transporter, endoplasmic reticulum	amp[c] <==> amp[r]	Transport, Endoplasmic Reticular	Cytosol, Endoplasmic Reticulum		Reversible
COAtr	COA transporter, endoplasmic reticulum	coa[c] <==> coa[r]	Transport, Endoplasmic Reticular	Cytosol, Endoplasmic Reticulum		Reversible
FORtr	FOR transporter, endoplasmic reticulum	for[c] <==> for[r]	Transport, Endoplasmic Reticular	Cytosol, Endoplasmic Reticulum		Reversible
PPItx	Diphosphate transporter, peroxisome	ppi[c] <==> ppi[x]	Transport, Peroxisomal	Cytosol, Peroxisome		Reversible
PItx	Phosphate transporter, peroxisome	pi[c] <==> pi[x]	Transport, Peroxisomal	Cytosol, Peroxisome		Reversible
Htx	H transporter, peroxisome	h[c] <==> h[x]	Transport, Peroxisomal	Cytosol, Peroxisome		Reversible
NADPHtxu	NADPH transporter, peroxisome	nadph[c] --> nadph[x]	Transport, Peroxisomal	Cytosol, Peroxisome		Irreversible
NADPtxu	NADP transporter, peroxisome	nadp[x] --> nadp[c]	Transport, Peroxisomal	Cytosol, Peroxisome		Irreversible
HMGCOAtx	Hydroxymethylglutaryl-CoA reversible peroxisomal transport	hmgcoa[c] <==> hmgcoa[x]	Transport, Peroxisomal	Cytosol, Peroxisome		Reversible
SPTix	serine-pyruvate aminotransferase (irreversible), peroxisomal	[x] : pyr + ser-L --> ala-L + hpyr	Glycine, Serine, and Threonine Metabolism	Peroxisome		Irreversible
AGTim	alanine-glyoxylate transaminase (irreversible), mitochondrial	[m] : ala-L + glx --> gly + pyr	Alanine and Aspartate Metabolism	Mitochondria	2.6.1.44	Irreversible
AGTix	alanine-glyoxylate transaminase (irreversible), (peroxisomal)	[x] : ala-L + glx --> gly + pyr	Alanine and Aspartate Metabolism	Peroxisome	2.6.1.44	Irreversible
THMt2m	Thiamine transport in via proton symport, mitochondrial	h[c] + thm[c] --> h[m] + thm[m]	Transport, Mitochondrial	Cytosol, Mitochondria		Irreversible
GLYtp	glycine passive transport to peroxisome	gly[c] <==> gly[x]	Transport, Peroxisomal	Cytosol, Peroxisome		Reversible
HPYRtp	hydroxypyruate transport, peroxisomal	hpyr[c] <==> hpyr[x]	Transport, Peroxisomal	Cytosol, Peroxisome		Reversible
TDPm	thiamin pyrophosphatase, mitochondrial	[m] : h2o + thmpp --> h + pi + thmmp	Thiamine Metabolism	Mitochondria	3.6.1.15	Irreversible
ACTNMO	acetone monooxygenase	[c] : acetone + h + nadph + o2 --> acetol + h2o + nadp	Pyruvate Metabolism	Cytosol		Irreversible
THMMPtm	Thiamine monophosphate transport, mitochondrial	oh1[m] + thmmp[c] <==> oh1[c] + thmmp[m]	Transport, Mitochondrial	Cytosol, Mitochondria		Reversible
ACTLMO	acetol monooxygenase	[c] : acetol + h + nadph + o2 --> (2) h2o + mthgxl + nadp	Pyruvate Metabolism	Cytosol		Irreversible
THMPPtm	Thiamine diphosphate transport in via anion antiport, mitochondria	(2) oh1[m] + thmpp[c] --> (2) oh1[c] + thmpp[m]	Transport, Mitochondrial	Cytosol, Mitochondria		Irreversible
MGSA2	methyglyoxylate synthase 2 (from g3p)	[c] : g3p --> mthgxl + pi	Pyruvate Metabolism	Cytosol	4.2.3.3	Irreversible
HXANtx	hypoxanthine diffusion in peroxisome	hxan[c] --> hxan[x]	Transport, Peroxisomal	Cytosol, Peroxisome		Irreversible
XANtx	xanthine diffusion in peroxisome	xan[c] --> xan[x]	Transport, Peroxisomal	Cytosol, Peroxisome		Irreversible
3AIBTm	L-3-aminoisobutyrate transaminase, mitochondrial	[m] : 2mop + glu-L <==> 3aib + akg	Valine, Leucine, and Isoleucine Metabolism	Mitochondria	2.6.1.22	Reversible
MMTSADm	malonate-semialdehyde dehydrogenase (acetylating), mitochondrial	[m] : 2mop + coa + nad --> h + mmcoa-R + nadh	Valine, Leucine, and Isoleucine Metabolism	Mitochondria	1.2.1.18	Irreversible
PHYHx	Phytanoyl-CoA dioxygenase, peroxisomal	[x] : akg + o2 + phytcoa --> co2 + phyt2ohcoa + succ	Fatty acid oxidation, peroxisome	Peroxisome	1.14.11.18	Irreversible
HPCLx	2-hydroxyphytanoyl-CoA lyase	[x] : (4) h + phyt2ohcoa --> formcoa + pristanal	Fatty Acid Metabolism	Peroxisome		Irreversible
DESAT22_2p	fatty acyl-CoA desaturase (n-C22:5CoA -> n-C22:6CoA)	[x] : clpndcoa + h + nadh + o2 --> c226coa + (2) h2o + nad	Fatty acid elongation	Peroxisome	1.14.19.1	Irreversible
FACOAL226	fatty-acid--CoA ligase	[c] : atp + coa + crvnc <==> amp + c226coa + ppi	Fatty acid activation	Cytosol	6.2.1.3	Reversible
DM_dctp(n)	DM_dctp(n)	[n] : dctp -->		Nucleus		Irreversible
DM_datp(n)	DM_datp(n)	[n] : datp -->		Nucleus		Irreversible
DM_dgtp(n)	DM_dgtp(n)	[n] : dgtp -->		Nucleus		Irreversible
DM_dttp(n)	DM_dttp(n)	[n] : dttp -->		Nucleus		Irreversible
DATPtn	dATP diffusion in nucleus	datp[c] <==> datp[n]	Transport, Nuclear	Cytosol, Nucleus		Reversible
DGTPtn	dGTP diffusion in nucleus	dgtp[c] <==> dgtp[n]	Transport, Nuclear	Cytosol, Nucleus		Reversible
DTTPtn	dTTP diffusion in nucleus	dttp[c] <==> dttp[n]	Transport, Nuclear	Cytosol, Nucleus		Reversible
DCTPtn	dCTP diffusion in nucleus	dctp[c] <==> dctp[n]	Transport, Nuclear	Cytosol, Nucleus		Reversible
PTE3x	peroxisomal acyl-CoA thioesterase	[x] : h2o + pristcoa --> coa + h + prist	Fatty Acid Metabolism	Peroxisome		Irreversible
PTE4x	peroxisomal acyl-CoA thioesterase	[x] : h2o + phytcoa --> coa + h + phyt	Fatty Acid Metabolism	Peroxisome		Irreversible
PTE5x	peroxisomal acyl-CoA thioesterase	[x] : adrncoa + h2o --> adrn + coa + h	Fatty Acid Metabolism	Peroxisome		Irreversible
GTPtn	GTP diffusion in nucleus	gtp[c] <==> gtp[n]	Transport, Nuclear	Cytosol, Nucleus		Reversible
CTPtn	CTP diffusion in nucleus	ctp[c] <==> ctp[n]	Transport, Nuclear	Cytosol, Nucleus		Reversible
ATPtn	ATP diffusion in nucleus	atp[c] <==> atp[n]	Transport, Nuclear	Cytosol, Nucleus		Reversible
UTPtn	UTP diffusion in nucleus	utp[c] <==> utp[n]	Transport, Nuclear	Cytosol, Nucleus		Reversible
DM_dgtp(m)	DM_dgtp(m)	[m] : dgtp -->		Mitochondria		Irreversible
ALR2	aldose reductase (methylglyoxal)	[c] : h + mthgxl + nadph --> acetol + nadp	Pyruvate Metabolism	Cytosol		Irreversible
ALR3	aldose reductase (acetol)	[c] : acetol + h + nadph --> 12ppd-S + nadp	Pyruvate Metabolism	Cytosol		Irreversible
ALCD21_L	alcohol dehydrogenase (L-1,2-propanediol)	[c] : 12ppd-S + nad --> h + lald-L + nadh	Pyruvate Metabolism	Cytosol		Irreversible
ALCD21_D	alcohol dehydrogenase (D-1,2-propanediol)	[c] : 12ppd-R + nad --> h + lald-D + nadh	Pyruvate Metabolism	Cytosol		Irreversible
ALCD22_D	alcohol dehydrogenase (D-lactaldehyde)	[c] : lald-D + nad --> h + mthgxl + nadh	Pyruvate Metabolism	Cytosol	1.1.1.78	Irreversible
ALCD22_L	alcohol dehydrogenase (L-lactaldehyde)	[c] : lald-L + nad --> h + mthgxl + nadh	Pyruvate Metabolism	Cytosol	1.2.1.49	Irreversible
LCADi_D	lactaldehyde dehydrogenase	[c] : h2o + lald-D + nad --> (2) h + lac-D + nadh	Pyruvate Metabolism	Cytosol	1.2.1.21	Irreversible
LCADim	lactaldehyde dehydrogenase, mitochondrial	[m] : h2o + lald-L + nad --> (2) h + lac-L + nadh	Pyruvate Metabolism	Mitochondria	1.2.1.21	Irreversible
LCADi_Dm	lactaldehyde dehydrogenase, mitochondrial	[m] : h2o + lald-D + nad --> (2) h + lac-D + nadh	Pyruvate Metabolism	Mitochondria	1.2.1.21	Irreversible
XOLDIOLONEtm	lipid, flip-flop intracellular transport	xoldiolone[m] <==> xoldiolone[r]	Transport, Endoplasmic Reticular	Endoplasmic Reticulum, Mitochondria		Reversible
XOLTRIOLtr	lipid, flip-flop intracellular transport	xoltriol[c] <==> xoltriol[r]	Transport, Endoplasmic Reticular	Cytosol, Endoplasmic Reticulum		Reversible
XOLTRIOLtm	lipid, flip-flop intracellular transport	xoltriol[c] <==> xoltriol[m]	Transport, Mitochondrial	Cytosol, Mitochondria		Reversible
XOL7AONEtr	lipid, flip-flop intracellular transport	xol7aone[c] <==> xol7aone[r]	Transport, Endoplasmic Reticular	Cytosol, Endoplasmic Reticulum		Reversible
XOL7AH2tm	lipid, flip-flop intracellular transport	xol7ah2[c] <==> xol7ah2[m]	Transport, Mitochondrial	Cytosol, Mitochondria		Reversible
XOL7AH2tr	lipid, flip-flop intracellular transport	xol7ah2[c] <==> xol7ah2[r]	Transport, Endoplasmic Reticular	Cytosol, Endoplasmic Reticulum		Reversible
THCHOLSTOICtm	lipid, flip-flop intracellular transport	thcholstoic[m] <==> thcholstoic[x]	Transport, Peroxisomal	Mitochondria, Peroxisome		Reversible
DHCHOLESTANATEtm	lipid, flip-flop intracellular transport	dhcholestanate[m] <==> dhcholestanate[x]	Transport, Peroxisomal	Mitochondria, Peroxisome		Reversible
BILIRUBtr	lipid, flip-flop intracellular transport	bilirub[c] <==> bilirub[r]	Transport, Endoplasmic Reticular	Cytosol, Endoplasmic Reticulum		Reversible
MMCDm	Methylmalonyl-CoA decarboxylase, mitochondrial	[m] : h + mmcoa-S --> co2 + ppcoa	Valine, Leucine, and Isoleucine Metabolism	Mitochondria	4.1.1.41	Irreversible
MMCDp	Methylmalonyl-CoA decarboxylase, peroxisomal	[x] : h + mmcoa-S --> co2 + ppcoa	Valine, Leucine, and Isoleucine Metabolism	Peroxisome	4.1.1.41	Irreversible
4HBZCOAFm	4-hydroxybenzoyl-CoA formation	[m] : coa + coucoa + h2o + nad --> 4hbzcoa + accoa + h + nadh	Ubiquinone Biosynthesis	Mitochondria		Irreversible
34HPLFM	3-(4-hydroxyphenyl-)lactate formation	[m] : 34hpp + h + nadh --> 34hpl + nad	Ubiquinone Biosynthesis	Mitochondria		Irreversible
T4HCINNMFM	4-hydroxycinnamate formation	[m] : 34hpl --> T4hcinnm + h2o	Ubiquinone Biosynthesis	Mitochondria		Irreversible
COUCOAFm	p-coumaroyl-CoA formation	[m] : T4hcinnm + atp + coa --> amp + coucoa + ppi	Ubiquinone Biosynthesis	Mitochondria		Irreversible
4HBZFm	4-hydroxybenzoate formation	[m] : 4hbzcoa + h2o --> 4hbz + coa + h	Ubiquinone Biosynthesis	Mitochondria		Irreversible
DPPS	decaprenyl synthase	[c] : frdp + (7) ipdp --> decdp + (7) ppi	Miscellaneous	Cytosol		Irreversible
DECDPtm	lipid, flip-flop intracellular transport	decdp[c] <==> decdp[m]	Transport, Mitochondrial	Cytosol, Mitochondria		Reversible
RTOTALCRNCPT1	carnitine fatty-acyl transferase	[c] : Rtotalcoa + crn --> Rtotalcrn + coa	Carnitine shuttle	Cytosol	2.3.1.21	Irreversible
RTOTAL2CRNCPT1	carnitine fatty-acyl transferase	[c] : Rtotal2coa + crn --> Rtotal2crn + coa	Carnitine shuttle	Cytosol	2.3.1.21	Irreversible
RTOTAL3CRNCPT1	carnitine fatty-acyl transferase	[c] : Rtotal3coa + crn --> Rtotal3crn + coa	Carnitine shuttle	Cytosol	2.3.1.21	Irreversible
RTOTALCRNCPT2	R group transport into the mitochondria	[m] : Rtotalcrn + coa --> Rtotalcoa + crn	Carnitine shuttle	Mitochondria		Irreversible
RTOTAL2CRNCPT2	R group transport into the mitochondria	[m] : Rtotal2crn + coa --> Rtotal2coa + crn	Carnitine shuttle	Mitochondria		Irreversible
RTOTAL3CRNCPT2	R group transport into the mitochondria	[m] : Rtotal3crn + coa --> Rtotal3coa + crn	Carnitine shuttle	Mitochondria		Irreversible
RTOTALCRNt	R group transport into the mitochondria	Rtotalcrn[c] --> Rtotalcrn[m]	Carnitine shuttle	Cytosol, Mitochondria		Irreversible
RTOTAL2CRNt	R group transport into the mitochondria	Rtotal2crn[c] --> Rtotal2crn[m]	Carnitine shuttle	Cytosol, Mitochondria		Irreversible
RTOTAL3CRNt	R group transport into the mitochondria	Rtotal3crn[c] --> Rtotal3crn[m]	Carnitine shuttle	Cytosol, Mitochondria		Irreversible
DESAT24_1	fatty acyl-CoA desaturase (n-C24:5CoA -> n-C24:6CoA)	[c] : h + nadh + o2 + tetpent3coa --> (2) h2o + nad + tethex3coa	Fatty acid elongation	Cytosol	1.14.19.1	Irreversible
ADRNCOAtx	fatty acid intracellular transport	adrncoa[c] <==> adrncoa[x]	Transport, Peroxisomal	Cytosol, Peroxisome		Reversible
DCSPTN1COAtx	fatty acid intracellular transport	dcsptn1coa[c] <==> dcsptn1coa[x]	Transport, Peroxisomal	Cytosol, Peroxisome		Reversible
CLPNDCOAtx	fatty acid intracellular transport	clpndcoa[c] <==> clpndcoa[x]	Transport, Peroxisomal	Cytosol, Peroxisome		Reversible
C226COAtx	fatty acid intracellular transport	c226coa[c] <==> c226coa[x]	Transport, Peroxisomal	Cytosol, Peroxisome		Reversible
FAEL183	fatty-acyl-CoA elongation (n-C18:3CoA)	[c] : (5) h + lnlncgcoa + malcoa + (4) nadph + o2 --> co2 + coa + dlnlcgcoa + (3) h2o + (4) nadp	Fatty acid elongation	Cytosol	2.3.1.86	Irreversible
FAEL204	fatty-acyl-CoA elongation (n-C20:4CoA)	[c] : arachdcoa + (5) h + malcoa + (4) nadph + o2 --> adrncoa + co2 + coa + (3) h2o + (4) nadp	Fatty acid elongation	Cytosol	2.3.1.86	Irreversible
FAEL184	fatty-acyl-CoA elongation (n-C20:4CoA)	[c] : (5) h + malcoa + (4) nadph + o2 + strdnccoa --> co2 + coa + eicostetcoa + (3) h2o + (4) nadp	Fatty acid elongation	Cytosol	2.3.1.86	Irreversible
FAEL205	fatty-acyl-CoA elongation (n-C20:5CoA)	[c] : (5) h + malcoa + (4) nadph + o2 + tmndnccoa --> clpndcoa + co2 + coa + (3) h2o + (4) nadp	Fatty acid elongation	Cytosol	2.3.1.86	Irreversible
ARTFR11	R group artificial flux	[c] : pmtcoa --> R1coa_hs	R Group Synthesis	Cytosol		Irreversible
ARTFR12	R group artificial flux (C16:1)	fadh2[m] + hdcoa[c] --> R1coa_hs[c] + fad[m]	R Group Synthesis	Cytosol, Mitochondria		Irreversible
RTOT1	R total flux	[c] : R1coa_hs --> Rtotalcoa	R Group Synthesis	Cytosol		Irreversible
SOAT11	sterol O-acyltransferase (acyl-Coenzyme A: cholesterol acyltransferase) 1	[c] : R1coa_hs + chsterol --> coa + xolest_hs	Cholesterol Metabolism	Cytosol		Irreversible
SOAT11r	sterol O-acyltransferase (acyl-Coenzyme A: cholesterol acyltransferase) 1	[r] : R1coa_hs + chsterol --> coa + xolest_hs	Cholesterol Metabolism	Endoplasmic Reticulum		Irreversible
ARTFR202	R group artificial flux (C18:3, n-3)	(2) fadh2[m] + h[m] + lnlncacoa[c] + nadph[m] --> (1.125) R2coa_hs[c] + (2) fad[m] + nadp[m]	R Group Synthesis	Cytosol, Mitochondria		Irreversible
ARTFR204	R group artificial flux	(2) fadh2[m] + (2) h[m] + (2) nadph[m] + strdnccoa[c] --> (1.125) R2coa_hs[c] + (2) fad[m] + (2) nadp[m]	R Group Synthesis	Cytosol, Mitochondria		Irreversible
ARTFR203	R group artificial flux	(2) fadh2[m] + h[m] + lnlncgcoa[c] + nadph[m] --> (1.125) R2coa_hs[c] + (2) fad[m] + nadp[m]	R Group Synthesis	Cytosol, Mitochondria		Irreversible
ARTFR205	R group artificial flux	dlnlcgcoa[c] + (2) fadh2[m] + h[m] + nadph[m] --> (1.25) R2coa_hs[c] + (2) fad[m] + nadp[m]	R Group Synthesis	Cytosol, Mitochondria		Irreversible
ARTFR206	R group artificial flux	arachdcoa[c] + (2) fadh2[m] + (2) h[m] + (2) nadph[m] --> (1.25) R2coa_hs[c] + (2) fad[m] + (2) nadp[m]	R Group Synthesis	Cytosol, Mitochondria		Irreversible
ARTFR207	R group artificial flux	[c] : arachcoa --> (1.25) R2coa_hs	R Group Synthesis	Cytosol		Irreversible
ARTFR208	R group artificial flux	(3) fadh2[m] + (2) h[m] + (2) nadph[m] + tmndnccoa[c] --> (1.25) R2coa_hs[c] + (3) fad[m] + (2) nadp[m]	R Group Synthesis	Cytosol, Mitochondria		Irreversible
ARTFR209	R group artificial flux	adrncoa[c] + (2) fadh2[m] + (2) h[m] + (2) nadph[m] --> (1.375) R2coa_hs[c] + (2) fad[m] + (2) nadp[m]	R Group Synthesis	Cytosol, Mitochondria		Irreversible
ARTFR210	R group artificial flux	fadh2[m] + h[m] + lnlccoa[c] + nadph[m] --> (1.125) R2coa_hs[c] + fad[m] + nadp[m]	R Group Synthesis	Cytosol, Mitochondria		Irreversible
ARTFR211	R group artificial flux	clpndcoa[c] + (3) fadh2[m] + (2) h[m] + (2) nadph[m] --> (1.375) R2coa_hs[c] + (3) fad[m] + (2) nadp[m]	R Group Synthesis	Cytosol, Mitochondria		Irreversible
ARTFR212	R group artificial flux	dcsptn1coa[c] + (3) fadh2[m] + (2) h[m] + (2) nadph[m] --> (1.375) R2coa_hs[c] + (3) fad[m] + (2) nadp[m]	R Group Synthesis	Cytosol, Mitochondria		Irreversible
ARTFR213	R group artificial flux	c226coa[c] + (3) fadh2[m] + (3) h[m] + (3) nadph[m] --> (1.375) R2coa_hs[c] + (3) fad[m] + (3) nadp[m]	R Group Synthesis	Cytosol, Mitochondria		Irreversible
RTOT2	R total flux	[c] : R2coa_hs --> Rtotalcoa	R Group Synthesis	Cytosol		Irreversible
RTOT_2	R total flux 2 position	[c] : R2coa_hs + R4coa_hs --> (2) Rtotal2coa	R Group Synthesis	Cytosol		Irreversible
RTOT_3	R total flux 3 position	[c] : R1coa_hs + R2coa_hs --> (2) Rtotal3coa	R Group Synthesis	Cytosol		Irreversible
SOAT12	sterol O-acyltransferase (acyl-Coenzyme A: cholesterol acyltransferase) 1	[c] : R2coa_hs + chsterol --> coa + xolest_hs	Cholesterol Metabolism	Cytosol		Irreversible
SOAT12r	sterol O-acyltransferase (acyl-Coenzyme A: cholesterol acyltransferase) 1	[r] : R2coa_hs + chsterol --> coa + xolest_hs	Cholesterol Metabolism	Endoplasmic Reticulum		Irreversible
ARTFR31	R group artificial flux	[c] : stcoa --> (1.125) R3coa_hs	R Group Synthesis	Cytosol		Irreversible
ARTFR32	R group artificial flux	fadh2[m] + odecoa[c] --> (1.125) R3coa_hs[c] + fad[m]	R Group Synthesis	Cytosol, Mitochondria		Irreversible
ARTFR33	R group artificial flux	fadh2[m] + vacccoa[c] --> (1.125) R3coa_hs[c] + fad[m]	R Group Synthesis	Cytosol, Mitochondria		Irreversible
[truncated: 809 more rows]
